# Supplementary material for: Constructing a cancer stem cell related prognostic model for predicting immune landscape and drug sensitivity in colorectal cancer
Source: PubMed Central journal article supplement (PMC10292801; doi:10.3389/fphar.2023.1200017), 2023-06-12
Supplement: DataSheet1.pdf [file DataSheet1.pdf]

| Table S2. The clinical information of GSE17538 dataset | OS.time  | OS | DFS | DFS.time | DSS | DSS.time | Age | Gender | Stage | Grade      |
|--------------------------------------------------------|----------|----|-----|----------|-----|----------|-----|--------|-------|------------|
| GSM437096                                              | 3576.3   | 0  | 0   | 3576.3   | 0   | 3576.3   | 56  | Female | 1     | Well       |
| GSM437100                                              | 3324.6   | 0  | 0   | 3276.3   | 0   | 3324.6   | 63  | Male   | 1     | Moderately |
| GSM437102                                              | 2523.9   | 0  | 0   | 2523.9   | 0   | 2523.9   | 66  | Male   | 1     | Moderately |
| GSM437111                                              | 1503     | 0  | 0   | 1503     | 0   | 1503     | 71  | Male   | 1     | Moderately |
| GSM437113                                              | 908.1    | 0  | 0   | 592.5    | 0   | 908.1    | 58  | Male   | 1     | Moderately |
| GSM437118                                              | 1659.9   | 0  | 0   | 1659.9   | 0   | 1659.9   | 77  | Female | 2     | Poorly     |
| GSM437119                                              | 4045.8   | 1  | 1   | 2809.8   | 1   | 4045.8   | 41  | Male   | 2     | Moderately |
| GSM437124                                              | 863.7    | 1  | 1   | 580.8    | 1   | 863.7    | 80  | Male   | 2     | Moderately |
| GSM437125                                              | 804.6    | 1  | 0   | 804.6    | 0   | 804.6    | 66  | Male   | 2     | Moderately |
| GSM437130                                              | 1011.9   | 1  | 1   | 423.9    | 1   | 1011.9   | 54  | Female | 2     | Moderately |
| GSM437133                                              | 1119.3   | 1  | 1   | 1119.3   | 1   | 1119.3   | 75  | Female | 2     | Well       |
| GSM437134                                              | 2592.9   | 0  | 0   | 2592.9   | 0   | 2592.9   | 74  | Female | 2     | Moderately |
| GSM437135                                              | 1677.6   | 0  | 0   | 1677.6   | 0   | 1677.6   | 74  | Female | 2     | Moderately |
| GSM437136                                              | 2119.5   | 0  | 0   | 2119.5   | 0   | 2119.5   | 83  | Female | 2     | Moderately |
| GSM437139                                              | 2519.7   | 0  | 1   | 671.4    | 0   | 2519.7   | 65  | Female | 2     | Moderately |
| GSM437144                                              | 1119.3   | 0  | 0   | 1119.3   | 0   | 1119.3   | 71  | Male   | 2     | Moderately |
| GSM437145                                              | 660.6    | 1  | 1   | 660.6    | 1   | 660.6    | 78  | Female | 2     | Moderately |
| GSM437152                                              | 1753.5   | 0  | 0   | 1401.3   | 0   | 1753.5   | 48  | Female | 2     | Moderately |
| GSM437153                                              | 1379.7   | 0  | 0   | 1379.7   | 0   | 1379.7   | 68  | Male   | 2     | Moderately |
| GSM437157                                              | 1177.5   | 0  | 0   | 1177.5   | 0   | 1177.5   | 59  | Female | 2     | Poorly     |
| GSM437159                                              | 757.2    | 0  | 0   | 757.2    | 0   | 757.2    | 71  | Male   | 2     | Moderately |
| GSM437163                                              | 1103.4   | 0  | 0   | 876.6    | 0   | 1103.4   | 64  | Female | 2     | Moderately |
| GSM437164                                              | 1245.6   | 0  | 0   | 858.9    | 0   | 1245.6   | 84  | Female | 2     | Moderately |
| GSM437174                                              | 727.8    | 1  | 1   | 357      | 1   | 727.8    | 46  | Male   | 3     | Moderately |
| GSM437175                                              | 3155.1   | 0  | 0   | 3155.1   | 0   | 3155.1   | 39  | Male   | 3     | Moderately |
| GSM437180                                              | 825.3    | 1  | 1   | 638.1    | 1   | 825.3    | 53  | Male   | 3     | Well       |
| GSM437181                                              | 1377.6   | 1  | 1   | 482.1    | 1   | 1377.6   | 53  | Female | 3     | Moderately |
| GSM437185                                              | 2985.3   | 0  | 0   | 2985.3   | 0   | 2985.3   | 48  | Female | 3     | Well       |
| GSM437187                                              | 2298     | 1  | 1   | 827.4    | 1   | 2298     | 58  | Male   | 3     | Poorly     |
| GSM437188                                              | 300.6    | 1  | 1   | 286.8    | 1   | 300.6    | 75  | Male   | 3     | Moderately |
| GSM437189                                              | 1243.5   | 1  | 1   | 700.2    | 1   | 1243.5   | 63  | Male   | 3     | Moderately |
| GSM437190                                              | 2887.8   | 0  | 0   | 2688.6   | 0   | 2887.8   | 46  | Male   | 3     | Moderately |
| GSM437191                                              | 2568.3   | 0  | 0   | 2568.3   | 0   | 2568.3   | 71  | Female | 3     | Moderately |
| GSM437197                                              | 170.4    | 1  | 1   | 99.6     | 1   | 170.4    | 83  | Female | 3     | Moderately |
| GSM437199                                              | 2222.1   | 0  | 1   | 745.5    | 0   | 2222.1   | 66  | Male   | 3     | Moderately |
| GSM437200                                              | 1522.8   | 1  | 1   | 1231.8   | 1   | 1522.8   | 69  | Male   | 3     | Moderately |
| GSM437201                                              | 2034.6   | 1  | 1   | 1107.6   | 1   | 2034.6   | 64  | Female | 3     | Moderately |
| GSM437203                                              | 1517.7   | 0  | 0   | 1517.7   | 0   | 1517.7   | 67  | Female | 3     | Poorly     |
| GSM437204                                              | 1037.4   | 1  | NA  | 0        | 1   | 1037.4   | 57  | Male   | 3     | Moderately |
| GSM437205                                              | 1161.6   | 1  | 0   | 1161.6   | 0   | 1161.6   | 73  | Female | 3     | Moderately |
| GSM437209                                              | 1780.2   | 0  | 0   | 1780.2   | 0   | 1780.2   | 69  | Male   | 3     | Poorly     |
| GSM437212                                              | 787.8    | 1  | 0   | 787.8    | 0   | 787.8    | 78  | Female | 3     | Poorly     |
| GSM437214                                              | 961.5    | 1  | 1   | 631.2    | 1   | 961.5    | 46  | Male   | 3     | Moderately |
| GSM437215                                              | 1678.5   | 0  | 0   | 1340.1   | 0   | 1678.5   | 67  | Male   | 3     | Moderately |
| GSM437219                                              | 1473.3   | 0  | 0   | 1473.3   | 0   | 1473.3   | 71  | Female | 3     | Moderately |
| GSM437224                                              | 27.6     | 0  | 0   | 27.6     | 0   | 27.6     | 54  | Male   | 3     | Moderately |
| GSM437225                                              | 940.8    | 0  | 0   | 940.8    | 0   | 940.8    | 78  | Female | 3     | Moderately |
| GSM437226                                              | 1209     | 0  | 0   | 568.8    | 0   | 1209     | 61  | Female | 3     | Moderately |
| GSM437227                                              | 3499.2   | 0  | 1   | 2575.2   | 0   | 3499.2   | 74  | Male   | 3     | Moderately |
| GSM437229                                              | 599.4    | 0  | 0   | 599.4    | 0   | 599.4    | 81  | Female | 3     | Poorly     |
| GSM437230                                              | 738.6    | 0  | 0   | 156.6    | 0   | 738.6    | 62  | Female | 3     | Moderately |
| GSM437234                                              | 159.6    | 1  | NA  | 0        | 1   | 159.6    | 46  | Male   | 4     | Moderately |
| GSM437235                                              | 70.8     | 1  | NA  | 0        | 1   | 70.8     | 69  | Male   | 4     | Poorly     |
| GSM437236                                              | 171.6    | 1  | NA  | 0        | 1   | 171.6    | 73  | Male   | 4     | Moderately |
| GSM437239                                              | 148.8    | 1  | NA  | 0        | 1   | 148.8    | 88  | Male   | 4     | Moderately |
| GSM437243                                              | 563.1    | 1  | 1   | 318.3    | 1   | 563.1    | 69  | Male   | 4     | Moderately |
| GSM437251                                              | 240.6    | 1  | NA  | 0        | 1   | 240.6    | 63  | Male   | 4     | Moderately |
| GSM437254                                              | 1108.5   | 1  | NA  | 0        | 0   | 1108.5   | 76  | Male   | 4     | Poorly     |
| GSM437257                                              | 692.1    | 1  | NA  | 0        | 1   | 692.1    | 42  | Female | 4     | Moderately |
| GSM437258                                              | 595.5    | 1  | NA  | 0        | 1   | 595.5    | 78  | Female | 4     | Moderately |
| GSM437262                                              | 457.5    | 1  | NA  | 0        | 1   | 457.5    | 73  | Male   | 4     | Moderately |
| GSM437268                                              | 683.4    | 1  | NA  | 0        | 1   | 683.4    | 68  | Male   | 4     | Moderately |
| GSM437270                                              | 1621.479 | 0  | 0   | 1621.479 | NA  | NA       | 70  | Female | 2     | NA         |
| GSM437271                                              | 1917.37  | 0  | 0   | 1917.37  | NA  | NA       | 48  | Female | 3     | Moderately |
| GSM437272                                              | 1388.712 | 1  | 0   | 1388.712 | NA  | NA       | 72  | Male   | 2     | Moderately |
| GSM437273                                              | 1800.986 | 0  | 0   | 1800.986 | NA  | NA       | 61  | Female | 3     | Well       |
| GSM437274                                              | 1447.89  | 1  | 1   | 1247.671 | NA  | NA       | 56  | Male   | 3     | NA         |
| GSM437275                                              | 1800.986 | 0  | 0   | 1800.986 | NA  | NA       | 57  | Female | 3     | Moderately |
| GSM437276                                              | 1816.767 | 0  | 1   | 1806.904 | NA  | NA       | 74  | Female | 3     | Moderately |
| GSM437277                                              | 1712.219 | 0  | 0   | 1712.219 | NA  | NA       | 52  | Male   | 3     | Moderately |
| GSM437278                                              | 1675.726 | 0  | 0   | 1675.726 | NA  | NA       | 70  | Female | 2     | Moderately |
| GSM437280                                              | 1642.192 | 0  | 0   | 1642.192 | NA  | NA       | 84  | Male   | 3     | Moderately |
| GSM437281                                              | 1738.849 | 0  | 0   | 1738.849 | NA  | NA       | 59  | Male   | 2     | NA         |
| GSM437283                                              | 1793.096 | 0  | 0   | 1793.096 | NA  | NA       | 66  | Female | 1     | Moderately |
| GSM437284                                              | 1872     | 0  | 0   | 1872     | NA  | NA       | 55  | Male   | 1     | NA         |
| GSM437285                                              | 1635.288 | 0  | 0   | 1635.288 | NA  | NA       | 81  | Female | 1     | Moderately |
| GSM437286                                              | 108.4932 | 1  | 1   | 0        | NA  | NA       | 23  | Female | 4     | NA         |
| GSM437287                                              | 1483.397 | 0  | 0   | 54.24658 | NA  | NA       | 69  | Male   | 2     | NA         |
| GSM437288                                              | 1925.26  | 0  | 0   | 88.76712 | NA  | NA       | 63  | Male   | 2     | NA         |
| GSM437289                                              | 1506.082 | 0  | 0   | 14.79452 | NA  | NA       | 47  | Male   | 3     | NA         |
| GSM437290                                              | 925.1507 | 1  | 1   | 881.7534 | NA  | NA       | 62  | Male   | 4     | NA         |
| GSM437291                                              | 1747.726 | 0  | 0   | 1628.384 | NA  | NA       | 72  | Male   | 2     | NA         |
| GSM437292                                              | 1229.918 | 1  | 1   | 1048.438 | NA  | NA       | 88  | Female | 4     | NA         |
| GSM437293                                              | 244.6027 | 1  | 1   | 0        | NA  | NA       | 29  | Female | 4     | NA         |
| GSM437294                                              | 1563.288 | 0  | 0   | 1382.795 | NA  | NA       | 74  | Female | 3     | NA         |
| GSM437295                                              | 156.8219 | 1  | 1   | 0        | NA  | NA       | 49  | Male   | 4     | NA         |
| GSM437296                                              | 3344.548 | 0  | 0   | 1363.068 | NA  | NA       | 51  | Female | 3     | NA         |
| GSM437297                                              | 234.7397 | 1  | 0   | 234.7397 | NA  | NA       | 78  | Female | 3     | Poorly     |
| GSM437298                                              | 2058.411 | 0  | 0   | 1918.356 | NA  | NA       | 67  | Male   | 2     | NA         |
| GSM437299                                              | 2041.644 | 0  | 0   | 2041.644 | NA  | NA       | 72  | Male   | 2     | Moderately |
| GSM437300                                              | 1504.11  | 0  | 0   | 1504.11  | NA  | NA       | 61  | Male   | 3     | Moderately |
| GSM437301                                              | 2125.479 | 0  | 1   | 541.4795 | NA  | NA       | 42  | Male   | 4     | Moderately |
| GSM437302                                              | 2229.041 | 0  | 1   | 0        | NA  | NA       | 57  | Female | 4     | Moderately |
| GSM437303                                              | 1393.644 | 0  | 0   | 1393.644 | NA  | NA       | 51  | Male   | 3     | Moderately |
| GSM437304                                              | 2303.014 | 0  | 0   | 2303.014 | NA  | NA       | 54  | Female | 4     | Moderately |
| GSM437305                                              | 702.2466 | 1  | 1   | 0        | NA  | NA       | 65  | Male   | 4     | Moderately |
| GSM437306                                              | 648.9863 | 1  | 0   | 648.9863 | NA  | NA       | 75  | Male   | 2     | Moderately |
| GSM437307                                              | 993.2055 | 1  | 0   | 993.2055 | NA  | NA       | 94  | Female | 2     | Moderately |
| GSM437308                                              | 2075.178 | 0  | 1   | 0        | NA  | NA       | 78  | Female | 4     | Moderately |
| GSM437309                                              | 1409.425 | 0  | 0   | 1409.425 | NA  | NA       | 63  | Female | 3     | Poorly     |
| GSM437310                                              | 1597.808 | 0  | 0   | 159.7808 | NA  | NA       | 57  | Female | 2     | NA         |
| GSM437311                                              | 1625.425 | 0  | 0   | 1493.26  | NA  | NA       | 56  | Female | 3     | NA         |
| GSM437312                                              | 1220.055 | 0  | 0   | 1220.055 | NA  | NA       | 47  | Male   | 3     | Moderately |
| GSM437313                                              | 1222.027 | 0  | 0   | 1222.027 | NA  | NA       | 51  | Male   | 2     | Moderately |
| GSM437314                                              | 415.2329 | 1  | 1   | 116.3836 | NA  | NA       | 80  | Female | 3     | Moderately |
| GSM437315                                              | 2113.644 | 0  | 0   | 2113.644 | NA  | NA       | 54  | Female | 3     | Moderately |
| GSM437317                                              | 46.35616 | 1  | 1   | 0        | NA  | NA       | 77  | Female | 4     | Poorly     |
| GSM437318                                              | 529.6438 | 1  | 1   | 0        | NA  | NA       | 56  | Male   | 4     | Moderately |
| GSM437319                                              | 379.726  | 1  | 1   | 0        | NA  | NA       | 38  | Female | 4     | Moderately |
| GSM437320                                              | 207.1233 | 1  | 1   | 0        | NA  | NA       | 64  | Female | 4     | Moderately |
| GSM437321                                              | 975.4521 | 1  | 1   | 0        | NA  | NA       | 62  | Female | 4     | Moderately |
| GSM437322                                              | 484.274  | 1  | 1   | 0        | NA  | NA       | 60  | Female | 4     | Moderately |
| GSM437323                                              | 12.82192 | 1  | 0   | 12.82192 | NA  | NA       | 93  | Male   | 2     | Moderately |
| GSM437324                                              | 1242.74  | 0  | 0   | 1242.74  | NA  | NA       | 69  | Male   | 2     | Moderately |
| GSM437093                                              | 4276.5   | 0  | 0   | 4276.5   | 0   | 4276.5   | 73  | Male   | 1     | Moderately |
| GSM437094                                              | 3681.6   | 0  | 0   | 3681.6   | 0   | 3681.6   | 63  | Male   | 1     | Well       |
| GSM437095                                              | 868.8    | 1  | 0   | 868.8    | 0   | 868.8    | 51  | Male   | 1     | Moderately |
| GSM437097                                              | 1785.9   | 0  | 0   | 1785.9   | 0   | 1785.9   | 50  | Male   | 1     | Moderately |
| GSM437098                                              | 2064.3   | 1  | 1   | 810.6    | 1   | 2064.3   | 63  | Female | 1     | Moderately |
| GSM437099                                              | 2468.7   | 0  | 0   | 2468.7   | 0   | 2468.7   | 66  | Male   | 1     | Well       |
| GSM437101                                              | 1976.4   | 1  | 0   | 1976.4   | 0   | 1976.4   | 88  | Male   | 1     | Moderately |
| GSM437103                                              | 494.1    | 1  | 0   | 494.1    | 0   | 494.1    | 80  | Female | 1     | Moderately |
| GSM437104                                              | 2692.5   | 0  | 0   | 2508     | 0   | 2692.5   | 62  | Male   | 1     | Moderately |
| GSM437105                                              | 2282.1   | 0  | 0   | 2282.1   | 0   | 2282.1   | 82  | Male   | 1     | Moderately |
| GSM437106                                              | 2034.6   | 0  | 0   | 2034.6   | 0   | 2034.6   | 78  | Female | 1     | Moderately |
| GSM437107                                              | 1567.2   | 0  | 0   | 1567.2   | 0   | 1567.2   | 76  | Male   | 1     | Well       |
| GSM437108                                              | 1923     | 0  | 0   | 1923     | 0   | 1923     | 87  | Female | 1     | Moderately |
| GSM437109                                              | 1653.9   | 0  | 0   | 1653.9   | 0   | 1653.9   | 74  | Female | 1     | Moderately |
| GSM437110                                              | 1733.7   | 0  | 0   | 1733.7   | 0   | 1733.7   | 55  | Male   | 1     | Moderately |
| GSM437112                                              | 1313.7   | 0  | 0   | 1313.7   | 0   | 1313.7   | 86  | Female | 1     | Moderately |
| GSM437114                                              | 109.2    | 0  | 0   | 109.2    | 0   | 109.2    | 78  | Male   | 1     | Moderately |
| GSM437115                                              | 1097.7   | 0  | 0   | 718.8    | 0   | 1097.7   | 57  | Male   | 1     | Well       |
| GSM437116                                              | 600.6    | 0  | 0   | 600.6    | 0   | 600.6    | 81  | Male   | 1     | Moderately |
| GSM437117                                              | 3557.4   | 0  | 0   | 3557.4   | 0   | 3557.4   | 74  | Female | 2     | Moderately |
| GSM437120                                              | 3818.7   | 0  | 0   | 3323.7   | 0   | 3818.7   | 43  | Female | 2     | Moderately |
| GSM437121                                              | 3618.6   | 0  | 1   | 829.2    | 0   | 3618.    |     |        |       |            |

| Table 53: The clinical information of GSE39582 dataset |         |          |     |      |        |       |         |         |         |
|--------------------------------------------------------|---------|----------|-----|------|--------|-------|---------|---------|---------|
| Sample                                                 | OS time | RFS time | RFS | Age  | Gender | Stage | T Stage | N Stage | M Stage |
| GSM97195270                                            | 1       | 0        | 1   | 36.4 | Female | 4     | T3      | N2      | M1      |
| GSM97196960                                            | 1       | 30       | 1   | 39.2 | Female | 4     | T3      | N1      | M1      |
| GSM971962190                                           | 0       | 2190     | 0   | 60.9 | Male   | 3     | T4      | N2      | M0      |
| GSM97196600                                            | 1       | 510      | 1   | 78.2 | Male   | 2     | T3      | N0      | M0      |
| GSM971963660                                           | 0       | 2790     | 1   | 44.9 | Female | 2     | T4      | N0      | M0      |
| GSM971931880                                           | 0       | 1380     | 0   | 24.9 | Male   | 2     | T3      | N0      | M0      |
| GSM971931680                                           | 0       | 1680     | 0   | 40.7 | Female | 4     | T4      | N1      | M1      |
| GSM971931380                                           | 0       | 1380     | 0   | 41.9 | Female | 2     | T3      | N0      | M0      |
| GSM971931470                                           | 0       | 1470     | 0   | 40.8 | Female | 3     | T4      | N1      | M0      |
| GSM971931440                                           | 0       | 1440     | 0   | 81.8 | Male   | 2     | T3      | N0      | M0      |
| GSM971932040                                           | 1       | 1260     | 0   | 79.3 | Male   | 3     | T4      | N2      | M0      |
| GSM971932040                                           | 0       | 2040     | 0   | 66.3 | Male   | 2     | T3      | N0      | M0      |
| GSM971932040                                           | 0       | 2040     | 0   | 66.7 | Male   | 2     | T3      | N0      | M0      |
| GSM97193540                                            | 1       | 480      | 1   | 77.2 | Female | 4     | T4      | N1      | M1      |
| GSM97193720                                            | 1       | 450      | 1   | 71.3 | Male   | 1     | T2      | N0      | M0      |
| GSM97193750                                            | 0       | 750      | 0   | 61.8 | Female | 2     | T4      | N0      | M0      |
| GSM971932280                                           | 0       | 2280     | 0   | 63   | Female | 3     | T3      | N1      | M0      |
| GSM971932670                                           | 0       | 2670     | 0   | 72   | Male   | 3     | T3      | N2      | M0      |
| GSM971932670                                           | 0       | 270      | 1   | 76.4 | Female | 3     | T3      | N2      | M0      |
| GSM971932670                                           | 1       | 0        | 1   | 64.9 | Female | 4     | T3      | N2      | M1      |
| GSM971932670                                           | 0       | 2670     | 0   | 62.6 | Male   | 4     | T3      | N1      | M1      |
| GSM971932690                                           | 1       | 0        | 1   | 67.5 | Female | 4     | T3      | N0      | M1      |
| GSM971932690                                           | 1       | 60       | 0   | 71   | Male   | 4     | T3      | N2      | M1      |
| GSM971932690                                           | 1       | 60       | 1   | 67.3 | Male   | 4     | T4      | N2      | M1      |
| GSM971932690                                           | 1       | 60       | 1   | 68.1 | Male   | 4     | T3      | N2      | M1      |
| GSM97193500                                            | 1       | 540      | 1   | 75.3 | Female | 4     | T4      | N1      | M1      |
| GSM971932730                                           | 0       | 2730     | 0   | 92.4 | Female | 2     | T3      | N0      | M0      |
| GSM971932730                                           | 1       | 420      | 1   | 74.5 | Female | 2     | T3      | N0      | M0      |
| GSM971931290                                           | 0       | 1290     | 0   | 73   | Female | 3     | T3      | N2      | M0      |
| GSM971931750                                           | 1       | 630      | 1   | 54   | Male   | 3     | T3      | N2      | M0      |
| GSM971931110                                           | 1       | 150      | 1   | 58   | Female | 3     | T3      | N3      | M0      |
| GSM971932460                                           | 0       | 2460     | 0   | 76   | Female | 3     | T3      | N2      | M0      |
| GSM971932020                                           | 1       | 960      | 1   | 75   | Male   | 3     | T3      | N2      | M0      |
| GSM971932820                                           | 0       | 2820     | 0   | 76   | Female | 3     | T3      | N2      | M0      |
| GSM971932340                                           | 0       | 2340     | 0   | 40   | Female | 3     | T3      | N2      | M0      |
| GSM971931080                                           | 0       | 1080     | 0   | 58   | Male   | 3     | T4      | N2      | M0      |
| GSM971931800                                           | 0       | 1800     | 0   | 64   | Female | 2     | T3      | N0      | M0      |
| GSM971931500                                           | 0       | 1500     | 0   | 77   | Male   | 2     | T3      | N0      | M0      |
| GSM971931500                                           | 0       | 1500     | 0   | 67   | Female | 2     | T3      | N0      | M0      |
| GSM971931560                                           | 1       | 30       | 0   | 41   | Male   | 2     | T3      | N0      | M0      |
| GSM971931560                                           | 1       | 60       | 1   | 65   | Male   | 4     | T4      | N0      | M1      |
| GSM971931740                                           | 0       | 630      | 1   | 54   | Male   | 2     | T3      | N0      | M0      |
| GSM97193490                                            | 0       | 990      | 0   | 93   | Female | 2     | T3      | N0      | M0      |
| GSM97193570                                            | 0       | 570      | 0   | 75   | Female | 2     | T3      | N0      | M0      |
| GSM97193840                                            | 1       | 0        | 1   | 34   | Female | 4     | T3      | N0      | M1      |
| GSM97193870                                            | 0       | 870      | 0   | 55   | Male   | 2     | T2      | N0      | M0      |
| GSM97193870                                            | 0       | 780      | 0   | 82   | Male   | 2     | T3      | N0      | M0      |
| GSM971932790                                           | 0       | 2790     | 0   | 31   | Female | 2     | T4      | N0      | M0      |
| GSM97193870                                            | 1       | 780      | 0   | 70   | Male   | 2     | T3      | N0      | M0      |
| GSM971931770                                           | 0       | 1770     | 0   | 76   | Female | 2     | T3      | N0      | M0      |
| GSM971931290                                           | 1       | 1290     | 0   | 76   | Female | 2     | T4      | N0      | M0      |
| GSM971931290                                           | 1       | 0        | 1   | 60   | Male   | 4     | T4      | N0      | M1      |
| GSM971935490                                           | 1       | 5490     | 0   | 83   | Female | 2     | T3      | N0      | M0      |
| GSM97193660                                            | 1       | 90       | 1   | 44   | Male   | 2     | T3      | N0      | M0      |
| GSM97193160                                            | 0       | 5160     | 0   | 70   | Female | 2     | T4      | N0      | M0      |
| GSM971931930                                           | 1       | 780      | 1   | 58   | Female | 2     | T3      | N0      | M0      |
| GSM971935040                                           | 0       | 5040     | 0   | 44   | Male   | 2     | T3      | N0      | M0      |
| GSM971933960                                           | 1       | 3570     | 1   | 75   | Female | 2     | T3      | N0      | M0      |
| GSM971933810                                           | 0       | 3810     | 0   | 65   | Female | 2     | T3      | N0      | M0      |
| GSM971932370                                           | 0       | 2370     | 0   | 73   | Female | 2     | T3      | N0      | M0      |
| GSM971932610                                           | 0       | 2610     | 0   | 68   | Female | 2     | T3      | N0      | M0      |
| GSM971932410                                           | 0       | 1410     | 0   | 76   | Female | 2     | T3      | N0      | M0      |
| GSM971931830                                           | 0       | 1830     | 0   | 67   | Female | 2     | T3      | N0      | M0      |
| GSM971932010                                           | 0       | 2010     | 0   | 50   | Male   | 2     | T3      | N0      | M0      |
| GSM971932010                                           | 1       | 360      | 1   | 64   | Male   | 3     | T4      | N1      | M0      |
| GSM971932010                                           | 1       | 450      | 0   | 66   | Female | 3     | T4      | N2      | M0      |
| GSM971931750                                           | 0       | 840      | 1   | 66   | Male   | 3     | T3      | N2      | M0      |
| GSM971931230                                           | 0       | 1230     | 0   | 72   | Female | 3     | T3      | N3      | M0      |
| GSM971931960                                           | 0       | 960      | 0   | 53   | Male   | 3     | T2      | N3      | M0      |
| GSM971931800                                           | 1       | 270      | 1   | 96   | Female | 3     | T3      | N1      | M0      |
| GSM971931800                                           | 1       | 1800     | 0   | 76   | Male   | 3     | T3      | N1      | M0      |
| GSM971931080                                           | 0       | 1080     | 0   | 63   | Male   | 3     | T3      | N2      | M0      |
| GSM971931560                                           | 0       | 390      | 1   | 96   | Male   | 3     | T3      | N2      | M0      |
| GSM971931960                                           | 1       | 540      | 1   | 64   | Female | 3     | T3      | N1      | M0      |
| GSM971931800                                           | 1       | 630      | 1   | 63   | Female | 3     | T3      | N2      | M0      |
| GSM971931960                                           | 1       | 630      | 1   | 64   | Female | 3     | T3      | N2      | M0      |
| GSM971931800                                           | 1       | 540      | 1   | 73   | Female | 3     | T3      | N1      | M0      |
| GSM971931800                                           | 1       | 330      | 1   | 59   | Female | 3     | T3      | N3      | M0      |
| GSM971931800                                           | 1       | 60       | 1   | 79   | Female | 3     | T3      | N2      | M0      |
| GSM971931900                                           | 1       | 570      | 1   | 64   | Female | 3     | T3      | N2      | M0      |
| GSM971932130                                           | 0       | 2130     | 0   | 53   | Male   | 2     | T3      | N0      | M0      |
| GSM971932250                                           | 0       | 2250     | 0   | 49   | Female | 2     | T3      | N0      | M0      |
| GSM971932040                                           | 0       | 420      | 1   | 64   | Female | 2     | T3      | N0      | M0      |
| GSM971932550                                           | 0       | 2550     | 0   | 66   | Female | 2     | T3      | N0      | M0      |
| GSM971932790                                           | 0       | 2790     | 0   | 64   | Male   | 2     | T3      | N0      | M0      |
| GSM971931650                                           | 0       | 1650     | 0   | 76   | Male   | 2     | T4      | N0      | M0      |
| GSM971932580                                           | 0       | 2580     | 0   | 87   | Female | 2     | T3      | N0      | M0      |
| GSM971931830                                           | 1       | 1830     | 0   | 87   | Female | 2     | T3      | N0      | M0      |
| GSM971931590                                           | 1       | 810      | 1   | 64   | Male   | 3     | T3      | N+      | M0      |
| GSM971931380                                           | 1       | 1210     | 1   | 68   | Male   | 2     | T3      | N+      | M0      |
| GSM971931510                                           | 0       | 1680     | 1   | 64   | Male   | 2     | T4      | N0      | M0      |
| GSM971931360                                           | 0       | 3630     | 0   | 63   | Female | 2     | T3      | N0      | M0      |
| GSM971931480                                           | 0       | 1980     | 0   | 60   | Male   | 3     | T3      | N2      | M0      |
| GSM971931380                                           | 0       | 3810     | 0   | 59   | Male   | 3     | T3      | N1      | M0      |
| GSM971931360                                           | 0       | 3600     | 0   | 45   | Female | 3     | T3      | N2      | M0      |
| GSM971932310                                           | 0       | 1170     | 1   | 73   | Male   | 2     | T3      | N0      | M0      |
| GSM971932190                                           | 0       | 2190     | 0   | 67   | Female | 3     | T2      | N2      | M0      |
| GSM971931900                                           | 0       | 3900     | 0   | 70   | Female | 3     | T4      | N1      | M0      |
| GSM971931150                                           | 1       | 120      | 1   | 88   | Female | 2     | T4      | N1      | M0      |
| GSM971932190                                           | 0       | 2910     | 0   | 75   | Male   | 3     | T3      | N1      | M0      |
| GSM971931290                                           | 1       | 840      | 1   | 83   | Female | 3     | T3      | N1      | M0      |
| GSM971931080                                           | 1       | 1050     | 1   | 85   | Female | 3     | T4      | N2      | M0      |
| GSM971931660                                           | 1       | 630      | 1   | 71   | Male   | 2     | N/A     | N/A     | N/A     |
| GSM971932010                                           | 1       | 600      | 1   | 69   | Female | 3     | N/A     | N/A     | N/A     |
| GSM971931540                                           | 1       | 510      | 1   | 77   | Female | 2     | N/A     | N/A     | N/A     |
| GSM971931720                                           | 1       | 570      | 1   | 66   | Male   | 2     | N/A     | N/A     | N/A     |
| GSM971931020                                           | 1       | 690      | 1   | 69   | Male   | 3     | N/A     | N/A     | N/A     |
| GSM971931740                                           | 1       | 690      | 1   | 53   | Male   | 2     | T4      | N0      | M0      |
| GSM971931960                                           | 1       | 330      | 1   | 62   | Female | 3     | N/A     | N/A     | N/A     |
| GSM971931170                                           | 1       | 120      | 1   | 70   | Female | 2     | N/A     | N/A     | N/A     |
| GSM971931410                                           | 1       | 620      | 1   | 58   | Female | 3     | N/A     | N/A     | N/A     |
| GSM971931760                                           | 0       | 5760     | 0   | 63   | Male   | 3     | T4      | N+      | M0      |
| GSM971931320                                           | 0       | 3240     | 0   | 68   | Male   | 2     | T3      | N0      | M0      |
| GSM971931470                                           | 0       | 4740     | 0   | 72   | Female | 2     | T3      | N0      | M0      |
| GSM971932190                                           | 0       | 2190     | 0   | 51   | Female | 3     | T3      | N1      | M0      |
| GSM971932490                                           | 0       | 2490     | 0   | 43   | Male   | 3     | T3      | N2      | M0      |
| GSM971931500                                           | 0       | 1500     | 0   | 69   | Female | 2     | T3      | N0      | M0      |
| GSM971931500                                           | 0       | 1980     | 0   | 73   | Male   | 3     | T3      | N2      | M0      |
| GSM971931620                                           | 0       | 1620     | 0   | 61   | Male   | 2     | T3      | N0      | M0      |
| GSM971932010                                           | 0       | 2010     | 0   | 78   | Male   | 3     | T3      | N2      | M0      |
| GSM9719321050                                          | 1       | 210      | 1   | 76   | Male   | 2     | N/A     | N/A     | N/A     |
| GSM971932390                                           | 1       | 0        | 1   | 63   | Male   | 4     | T4      | N2      | M1      |
| GSM971932390                                           | 1       | 0        | 1   | 54   | Male   | 4     | T3      | N2      | M1      |
| GSM971931380                                           | 1       | 0        | 1   | 50   | Male   | 4     | T3      | N+      | M1      |
| GSM971932130                                           | 1       | 0        | 1   | 71   | Female | 4     | T3      | N0      | M1      |
| GSM97193211410                                         | 0       | 1410     | 0   | 73   | Female | 3     | T4      | N2      | M0      |
| GSM97193212820                                         | 0       | 0        | 1   | 45   | Female | 4     | T3      | N2      | M1      |
| GSM97193221200                                         | 0       | 0        | 1   | 73   | Male   | 4     | T3      | N1      | M1      |
| GSM9719322750                                          | 1       | 600      | 1   | 74   | Male   | 3     | T4      | N2      | M0      |
| GSM971932310                                           | 0       | 810      | 0   | 55   | Female | 3     | T3      | N1      | M0      |
| GSM9719323420                                          | 0       | 420      | 0   | 54   | Male   | 4     | T3      | N1      | M1      |
| GSM9719323630                                          | 0       | 630      | 0   | 69   | Male   | 4     | T3      | N2      | M0      |
| GSM9719323300                                          | 1       | 300      | 0   | 79   | Male   | 4     | T3      | N1      | M1      |
| GSM9719323210                                          | 0       | 210      | 0   | 57   | Female | 3     | T2      | N1      | M0      |
| GSM9719324420                                          | 0       | 420      | 0   | 67   | Female | 4     | T3      | N1      | M1      |
| GSM9719324420                                          | 0       | 420      | 0   | 51   | Female | 1     | T1      | N0      | M0      |
| GSM9719324180                                          | 0       | 180      | 0   | 79   | Male   | 2     | T4      | N0      | M0      |
| GSM9719324420                                          | 0       | 420      | 0   | 58   | Male   | 2     | T3      | N0      | M0      |
| GSM97193225210                                         | 1       | 210      | 0   | 57   | Male   | 4     | T4      | N1      | M1      |
| GSM97193225420                                         | 0       | 270      | 1   | 77   | Female | 4     | T3      | N0      | M1      |
| GSM97193225150                                         | 0       | 150      | 0   | 81   | Female | 2     | T3      | N0      | M0      |
| GSM9719322570                                          | 0       | 390      | 1   | 63   | Female | 4     | T4      | N1      | M1      |
| GSM9719322870                                          | 0       | 870      | 0   | 72   | Female | 2     | T4      | N0      | M0      |
| GSM9719322870                                          | 0       | 390      | 0   | 70   | Male   | 4     | T3      | N2      | M1      |
| GSM97193221500                                         | 0       | 150      | 0   | 88   | Female | 2     | T4      | N0      | MX      |
| GSM971932261800                                        | 1       | 1800     | 0   | 78   | Female | 3     | T3      | N1      | M0      |
| GSM9719326600                                          | 1       | 600      | 0   | 56   | Male   | 4     | T4      | N2      | M1      |
| GSM971932262370                                        | 0       | 2370     | 0   | 70   | Male   | 1     | T2      | N0      | M0      |
| GSM97193227420                                         | 1       | 390      | 1   | 92   | Male   | 3     | T4      | N1      | M0      |
| GSM97193227170                                         | 0       | 1710     | 0   | 91   | Female | 3     | T4      | N2      | M0      |
| GSM97193227120                                         | 1       | 90       | 1   | 76   | Male   | 2     | T4      | N0      | M0      |
| GSM97193221290                                         | 0       | 1290     | 0   | 59   | Female | 3     | T3      | N2      | M0      |
| GSM971932281380                                        | 1       | 1380     | 0   | 79   | Female | 2     | T4      | N0      | M0      |
| GSM971932281530                                        | 0       | 1530     | 0   | 79.4 | Female | 1     | T2      | N0      | M0      |
| GSM971932281530                                        | 0       | 1530     | 0   | 65   | Male   | 2     | T3      | N0      | M0      |
| GSM971932281050                                        | 1       | 1050     | 0   | 53   | Male   | 4     | T4      | N1      | M1      |
| GSM971932281500                                        | 0       | 1500     | 0   | NA   | Male   | 1     | T2      | N0      | M0      |
| GSM97                                                  |         |          |     |      |        |       |         |         |         |

Table S4. A list of cell marker genes

| Cells            | marker genes            |
|------------------|-------------------------|
| cancer stem cell | CD24                    |
| endothelial cell | CDH5, PLVAP, VWF, CLDN5 |
| Fibroblasts      | COL1A1, COL1A2, DCN     |
| T cells          | CD2, CD3D, CD3E, CD3G   |
| B cells          | CD79A, CD79B            |
| Myeloid cells    | CD14, LYZ               |
| Mast cells       | GATA2, TPSAB1, TPSB2    |
| NK               | KLRF1, FGFBP2, KLRC1    |

Table S5. The DEGs of eight cell types

| p_val | avg_logFC | pct.1 | pct.2 | p_val_adj | cluster | gene     | pct.diff |
|-------|-----------|-------|-------|-----------|---------|----------|----------|
| 0     | 2.295997  | 1     | 0.863 | 0         | B cells | CD74     | 0.137    |
| 0     | 2.2336    | 0.981 | 0.689 | 0         | B cells | CD79A    | 0.292    |
| 0     | 2.195389  | 0.991 | 0.729 | 0         | B cells | HLA-DRA  | 0.262    |
| 0     | 2.116231  | 0.973 | 0.826 | 0         | B cells | CD83     | 0.147    |
| 0     | 1.679801  | 0.653 | 0.427 | 0         | B cells | IGKV4-1  | 0.226    |
| 0     | 1.667275  | 0.984 | 0.753 | 0         | B cells | HLA-DRB  | 0.231    |
| 0     | 1.601128  | 0.951 | 0.66  | 0         | B cells | HLA-DQA  | 0.291    |
| 0     | 1.55215   | 0.987 | 0.743 | 0         | B cells | HLA-DPA  | 0.244    |
| 0     | 1.538034  | 0.952 | 0.649 | 0         | B cells | HLA-DQB  | 0.303    |
| 0     | 1.534164  | 0.974 | 0.71  | 0         | B cells | HLA-DPB  | 0.264    |
| 0     | 1.438705  | 0.821 | 0.55  | 0         | B cells | IGHM     | 0.271    |
| 0     | 1.368449  | 0.921 | 0.64  | 0         | B cells | IRF8     | 0.281    |
| 0     | 1.278978  | 0.979 | 0.891 | 0         | B cells | KLF2     | 0.088    |
| 0     | 1.169599  | 0.911 | 0.693 | 0         | B cells | LY9      | 0.218    |
| 0     | 1.166006  | 0.976 | 0.889 | 0         | B cells | HERPUD1  | 0.087    |
| 0     | 1.159173  | 0.833 | 0.662 | 0         | B cells | VPREB3   | 0.171    |
| 0     | 1.107408  | 0.894 | 0.682 | 0         | B cells | CD79B    | 0.212    |
| 0     | 1.07549   | 0.935 | 0.651 | 0         | B cells | HLA-DRB  | 0.284    |
| 0     | 1.044021  | 0.882 | 0.671 | 0         | B cells | HLA-DMA  | 0.211    |
| 0     | 1.010721  | 0.838 | 0.684 | 0         | B cells | MEF2C    | 0.154    |
| 0     | 0.983856  | 0.9   | 0.728 | 0         | B cells | NCF1     | 0.172    |
| 0     | 0.903459  | 0.839 | 0.681 | 0         | B cells | LINC0092 | 0.158    |
| 0     | 0.8961    | 0.965 | 0.831 | 0         | B cells | CD55     | 0.134    |
| 0     | 0.846591  | 0.802 | 0.466 | 0         | B cells | POU2AF1  | 0.336    |
| 0     | 0.840425  | 0.969 | 0.919 | 0         | B cells | NR4A1    | 0.05     |
| 0     | 0.818431  | 0.762 | 0.547 | 0         | B cells | SMIM14   | 0.215    |
| 0     | 0.811881  | 0.845 | 0.76  | 0         | B cells | LYN      | 0.085    |
| 0     | 0.777389  | 0.905 | 0.774 | 0         | B cells | SYNGR2   | 0.131    |
| 0     | 0.76606   | 0.914 | 0.819 | 0         | B cells | MARCKSI  | 0.095    |
| 0     | 0.75379   | 0.83  | 0.646 | 0         | B cells | ARHGAP2  | 0.184    |
| 0     | 0.732164  | 0.952 | 0.813 | 0         | B cells | LIMD2    | 0.139    |
| 0     | 0.731386  | 0.96  | 0.886 | 0         | B cells | NR4A2    | 0.074    |
| 0     | 0.73054   | 0.741 | 0.637 | 0         | B cells | ADAM28   | 0.104    |
| 0     | 0.709496  | 0.804 | 0.578 | 0         | B cells | CD40     | 0.226    |
| 0     | 0.697937  | 0.767 | 0.64  | 0         | B cells | HVCN1    | 0.127    |
| 0     | 0.692632  | 0.766 | 0.59  | 0         | B cells | POU2F2   | 0.176    |
| 0     | 0.687188  | 0.757 | 0.704 | 0         | B cells | LY86     | 0.053    |
| 0     | 0.681705  | 0.838 | 0.707 | 0         | B cells | SNX2     | 0.131    |
| 0     | 0.659091  | 0.799 | 0.646 | 0         | B cells | AFF3     | 0.153    |
| 0     | 0.648468  | 0.84  | 0.68  | 0         | B cells | RASGEF1  | 0.16     |
| 0     | 0.64785   | 0.794 | 0.668 | 0         | B cells | HLA-DMB  | 0.126    |
| 0     | 0.622331  | 0.761 | 0.613 | 0         | B cells | SWAP70   | 0.148    |
| 0     | 0.610756  | 0.76  | 0.682 | 0         | B cells | BLNK     | 0.078    |
| 0     | 0.586323  | 0.818 | 0.648 | 0         | B cells | IFT57    | 0.17     |
| 0     | 0.584539  | 0.775 | 0.629 | 0         | B cells | ST6GAL1  | 0.146    |
| 0     | 0.570446  | 0.718 | 0.565 | 0         | B cells | GNG7     | 0.153    |
| 0     | 0.527792  | 0.708 | 0.648 | 0         | B cells | TCF4     | 0.06     |
| 0     | 0.51997   | 0.822 | 0.711 | 0         | B cells | CD24     | 0.111    |
| 0     | 0.510563  | 0.786 | 0.636 | 0         | B cells | ORAI2    | 0.15     |
| 0     | 0.500815  | 0.824 | 0.706 | 0         | B cells | BACH2    | 0.118    |
| 0     | 0.480611  | 0.808 | 0.69  | 0         | B cells | TSPAN3   | 0.118    |
| 0     | 0.471161  | 0.806 | 0.656 | 0         | B cells | TPD52    | 0.15     |
| 0     | 0.46891   | 0.926 | 0.827 | 0         | B cells | RNASET2  | 0.099    |
| 0     | 0.454638  | 0.757 | 0.623 | 0         | B cells | STX7     | 0.134    |

|           |          |       |       |           |         |           |        |
|-----------|----------|-------|-------|-----------|---------|-----------|--------|
| 0         | 0.454325 | 0.87  | 0.779 | 0         | B cells | ALG13     | 0.091  |
| 0         | 0.448118 | 0.703 | 0.608 | 0         | B cells | BASP1     | 0.095  |
| 0         | 0.444221 | 0.726 | 0.684 | 0         | B cells | RNASE6    | 0.042  |
| 0         | 0.439545 | 0.746 | 0.646 | 0         | B cells | SH3BP5    | 0.1    |
| 0         | 0.412709 | 0.734 | 0.633 | 0         | B cells | TSPAN13   | 0.101  |
| 0         | 0.360609 | 0.769 | 0.647 | 0         | B cells | LHPP      | 0.122  |
| 0         | 0.331958 | 0.723 | 0.575 | 0         | B cells | DAPP1     | 0.148  |
| 0         | 0.327032 | 0.768 | 0.595 | 0         | B cells | BACH1     | 0.173  |
| 0         | 0.313198 | 0.76  | 0.666 | 0         | B cells | KDM4B     | 0.094  |
| 0         | 0.312391 | 0.723 | 0.513 | 0         | B cells | HHEX      | 0.21   |
| 0         | 0.29702  | 0.807 | 0.691 | 0         | B cells | PARVB     | 0.116  |
| 1.76E-303 | 0.321696 | 0.627 | 0.408 | 3.52E-300 | B cells | CIITA     | 0.219  |
| 4.43E-302 | 0.446323 | 0.671 | 0.572 | 8.87E-299 | B cells | BTK       | 0.099  |
| 2.57E-296 | 0.440567 | 0.722 | 0.649 | 5.14E-293 | B cells | SYVN1     | 0.073  |
| 1.25E-287 | 0.529819 | 0.711 | 0.553 | 2.50E-284 | B cells | STAG3     | 0.158  |
| 7.94E-284 | 0.347114 | 0.72  | 0.615 | 1.59E-280 | B cells | SCPEP1    | 0.105  |
| 5.54E-282 | 0.404615 | 0.751 | 0.765 | 1.11E-278 | B cells | CXXC5     | -0.014 |
| 5.87E-276 | 0.416981 | 0.855 | 0.758 | 1.17E-272 | B cells | TENT5C    | 0.097  |
| 6.19E-274 | 0.373553 | 0.756 | 0.655 | 1.24E-270 | B cells | GGA2      | 0.101  |
| 6.16E-269 | 0.273642 | 0.999 | 0.995 | 1.23E-265 | B cells | EEF1A1    | 0.004  |
| 1.23E-261 | 0.50093  | 0.728 | 0.716 | 2.47E-258 | B cells | LAT2      | 0.012  |
| 2.95E-259 | 0.365875 | 0.782 | 0.67  | 5.90E-256 | B cells | CTSS      | 0.112  |
| 1.51E-258 | 0.34221  | 0.745 | 0.656 | 3.03E-255 | B cells | IFNGR2    | 0.089  |
| 1.92E-258 | 0.275794 | 0.668 | 0.487 | 3.85E-255 | B cells | CD200     | 0.181  |
| 1.03E-253 | 0.323253 | 0.861 | 0.787 | 2.05E-250 | B cells | KDM6B     | 0.074  |
| 3.27E-253 | 0.336071 | 0.839 | 0.789 | 6.54E-250 | B cells | ID3       | 0.05   |
| 4.97E-245 | 2.23224  | 0.659 | 0.539 | 9.95E-242 | B cells | IGKC      | 0.12   |
| 2.38E-236 | 0.410309 | 0.966 | 0.894 | 4.77E-233 | B cells | CD52      | 0.072  |
| 3.59E-235 | 0.423463 | 0.781 | 0.711 | 7.19E-232 | B cells | CTSH      | 0.07   |
| 7.32E-233 | 0.398414 | 0.579 | 0.343 | 1.46E-229 | B cells | IGLC3     | 0.236  |
| 9.59E-231 | 0.417096 | 0.852 | 0.82  | 1.92E-227 | B cells | CHCHD10   | 0.032  |
| 2.87E-230 | 0.509894 | 0.659 | 0.648 | 5.74E-227 | B cells | 1-Mar     | 0.011  |
| 3.13E-214 | 0.283267 | 0.725 | 0.595 | 6.27E-211 | B cells | AC007384  | 0.13   |
| 3.62E-211 | 0.269254 | 0.693 | 0.566 | 7.24E-208 | B cells | PLEKHG1   | 0.127  |
| 6.50E-209 | 0.353459 | 0.914 | 0.878 | 1.30E-205 | B cells | ODC1      | 0.036  |
| 1.30E-202 | 0.397595 | 0.739 | 0.665 | 2.61E-199 | B cells | BCL2A1    | 0.074  |
| 1.99E-200 | 0.300324 | 0.639 | 0.532 | 3.98E-197 | B cells | FCHSD2    | 0.107  |
| 4.68E-197 | 0.343995 | 0.87  | 0.809 | 9.36E-194 | B cells | ANKRD37   | 0.061  |
| 2.49E-192 | 0.482003 | 0.878 | 0.812 | 4.98E-189 | B cells | REL       | 0.066  |
| 8.38E-191 | 0.453374 | 0.718 | 0.719 | 1.68E-187 | B cells | BCAS4     | -0.001 |
| 1.47E-189 | 0.320235 | 0.83  | 0.75  | 2.94E-186 | B cells | RBKS      | 0.08   |
| 1.62E-187 | 0.318162 | 0.762 | 0.724 | 3.25E-184 | B cells | NFKBID    | 0.038  |
| 1.82E-186 | 0.318489 | 0.897 | 0.852 | 3.65E-183 | B cells | RHOB      | 0.045  |
| 1.49E-173 | 0.301294 | 0.73  | 0.698 | 2.98E-170 | B cells | NCOA3     | 0.032  |
| 2.90E-172 | 0.361479 | 0.944 | 0.916 | 5.80E-169 | B cells | RPL22L1   | 0.028  |
| 1.01E-168 | 0.389829 | 0.653 | 0.648 | 2.02E-165 | B cells | SYK       | 0.005  |
| 4.72E-164 | 0.467262 | 0.665 | 0.725 | 9.43E-161 | B cells | RALGPS2   | -0.06  |
| 8.66E-160 | 0.319965 | 0.686 | 0.639 | 1.73E-156 | B cells | PRKCB     | 0.047  |
| 1.54E-158 | 0.293155 | 0.716 | 0.672 | 3.08E-155 | B cells | LRMP      | 0.044  |
| 2.35E-157 | 1.572547 | 0.577 | 0.471 | 4.70E-154 | B cells | IGHA1     | 0.106  |
| 3.56E-156 | 0.379716 | 0.889 | 0.806 | 7.12E-153 | B cells | LTB       | 0.083  |
| 5.83E-156 | 0.270422 | 0.846 | 0.704 | 1.17E-152 | B cells | BIRC3     | 0.142  |
| 2.36E-154 | 0.282873 | 0.655 | 0.611 | 4.71E-151 | B cells | LINC01480 | 0.044  |
| 1.99E-152 | 0.328268 | 0.705 | 0.673 | 3.97E-149 | B cells | KLHL6     | 0.032  |
| 7.09E-152 | 0.334166 | 0.996 | 0.957 | 1.42E-148 | B cells | DUSP1     | 0.039  |
| 2.77E-147 | 0.3916   | 0.991 | 0.94  | 5.55E-144 | B cells | CD69      | 0.051  |

|           |          |       |       |           |             |           |        |
|-----------|----------|-------|-------|-----------|-------------|-----------|--------|
| 4.10E-138 | 0.320304 | 0.913 | 0.785 | 8.20E-135 | B cells     | UCP2      | 0.128  |
| 1.07E-136 | 0.284816 | 0.571 | 0.492 | 2.13E-133 | B cells     | CPNE5     | 0.079  |
| 4.03E-125 | 0.267595 | 0.973 | 0.95  | 8.06E-122 | B cells     | FOSB      | 0.023  |
| 7.72E-125 | 0.328681 | 0.853 | 0.784 | 1.54E-121 | B cells     | RGS2      | 0.069  |
| 1.04E-119 | 0.32242  | 0.727 | 0.683 | 2.08E-116 | B cells     | FAM3C     | 0.044  |
| 1.70E-118 | 0.284497 | 0.934 | 0.876 | 3.40E-115 | B cells     | SLC2A3    | 0.058  |
| 3.97E-118 | 0.883528 | 0.672 | 0.649 | 7.94E-115 | B cells     | MZB1      | 0.023  |
| 7.06E-114 | 0.556708 | 0.571 | 0.535 | 1.41E-110 | B cells     | DERL3     | 0.036  |
| 2.93E-112 | 0.273339 | 0.798 | 0.754 | 5.87E-109 | B cells     | MAP3K8    | 0.044  |
| 2.99E-109 | 3.574624 | 0.556 | 0.482 | 5.99E-106 | B cells     | JCHAIN    | 0.074  |
| 1.67E-107 | 0.328931 | 0.77  | 0.765 | 3.33E-104 | B cells     | PTPN6     | 0.005  |
| 1.94E-98  | 0.301992 | 0.956 | 0.923 | 3.88E-95  | B cells     | ZFP36L1   | 0.033  |
| 4.43E-94  | 0.460261 | 0.741 | 0.724 | 8.87E-91  | B cells     | UBE2J1    | 0.017  |
| 3.86E-90  | 0.265925 | 0.863 | 0.813 | 7.72E-87  | B cells     | PDE4B     | 0.05   |
| 2.35E-84  | 0.302173 | 0.825 | 0.755 | 4.70E-81  | B cells     | CHMP1B    | 0.07   |
| 1.18E-73  | 0.283752 | 0.768 | 0.757 | 2.35E-70  | B cells     | SELL      | 0.011  |
| 2.29E-66  | 0.302438 | 0.537 | 0.499 | 4.59E-63  | B cells     | FGD2      | 0.038  |
| 1.28E-65  | 0.407197 | 0.633 | 0.585 | 2.55E-62  | B cells     | PRPSAP2   | 0.048  |
| 1.04E-46  | 0.277591 | 0.631 | 0.679 | 2.09E-43  | B cells     | SEL1L3    | -0.048 |
| 6.17E-44  | 0.291797 | 0.53  | 0.558 | 1.23E-40  | B cells     | STAP1     | -0.028 |
| 9.13E-22  | 0.328141 | 0.823 | 0.896 | 1.83E-18  | B cells     | SSR4      | -0.073 |
| 0         | 2.879204 | 0.982 | 0.792 | 0         | cancer ster | KRT18     | 0.19   |
| 0         | 2.634373 | 0.966 | 0.777 | 0         | cancer ster | PHGR1     | 0.189  |
| 0         | 2.372175 | 0.904 | 0.751 | 0         | cancer ster | TFF3      | 0.153  |
| 0         | 1.99778  | 0.99  | 0.916 | 0         | cancer ster | S100A6    | 0.074  |
| 0         | 1.946285 | 0.898 | 0.797 | 0         | cancer ster | SOX4      | 0.101  |
| 0         | 1.592975 | 0.948 | 0.832 | 0         | cancer ster | HSPB1     | 0.116  |
| 0         | 1.521645 | 0.87  | 0.777 | 0         | cancer ster | PHLDA2    | 0.093  |
| 0         | 1.379261 | 0.831 | 0.779 | 0         | cancer ster | PERP      | 0.052  |
| 0         | 1.332617 | 0.897 | 0.894 | 0         | cancer ster | NEAT1     | 0.003  |
| 0         | 1.302628 | 0.971 | 0.938 | 0         | cancer ster | MIF       | 0.033  |
| 0         | 1.260687 | 0.821 | 0.673 | 0         | cancer ster | AC103702  | 0.148  |
| 0         | 1.242663 | 0.973 | 0.999 | 0         | cancer ster | MALAT1    | -0.026 |
| 0         | 1.235122 | 0.878 | 0.767 | 0         | cancer ster | ANO9      | 0.111  |
| 0         | 1.156583 | 0.817 | 0.769 | 0         | cancer ster | RRBP1     | 0.048  |
| 0         | 1.143234 | 0.882 | 0.778 | 0         | cancer ster | QTRT1     | 0.104  |
| 0         | 1.138477 | 0.891 | 0.829 | 0         | cancer ster | LGALS3    | 0.062  |
| 0         | 1.051631 | 0.904 | 0.851 | 0         | cancer ster | GSTP1     | 0.053  |
| 0         | 1.044237 | 0.786 | 0.821 | 0         | cancer ster | ID1       | -0.035 |
| 0         | 1.030806 | 0.897 | 0.848 | 0         | cancer ster | TXN       | 0.049  |
| 0         | 0.966509 | 0.877 | 0.822 | 0         | cancer ster | H2AFJ     | 0.055  |
| 0         | 0.956019 | 0.795 | 0.793 | 0         | cancer ster | HOOK2     | 0.002  |
| 0         | 0.912594 | 0.841 | 0.789 | 0         | cancer ster | TNFSF9    | 0.052  |
| 0         | 0.90943  | 0.824 | 0.688 | 0         | cancer ster | EPS8L2    | 0.136  |
| 0         | 0.896661 | 0.822 | 0.738 | 0         | cancer ster | ASL       | 0.084  |
| 0         | 0.895722 | 0.927 | 0.925 | 0         | cancer ster | S100A10   | 0.002  |
| 0         | 0.893614 | 0.796 | 0.708 | 0         | cancer ster | HIST1H2A  | 0.088  |
| 0         | 0.8845   | 0.837 | 0.72  | 0         | cancer ster | CC2D1A    | 0.117  |
| 0         | 0.847361 | 0.838 | 0.739 | 0         | cancer ster | COMTD1    | 0.099  |
| 0         | 0.841861 | 0.864 | 0.742 | 0         | cancer ster | CPNE7     | 0.122  |
| 0         | 0.841816 | 0.788 | 0.755 | 0         | cancer ster | TNFRSF100 | 0.033  |
| 0         | 0.835825 | 0.793 | 0.717 | 0         | cancer ster | CD9       | 0.076  |
| 0         | 0.826738 | 0.851 | 0.726 | 0         | cancer ster | SLC39A4   | 0.125  |
| 0         | 0.797651 | 0.995 | 0.997 | 0         | cancer ster | RPS18     | -0.002 |
| 0         | 0.794514 | 0.732 | 0.715 | 0         | cancer ster | STARD10   | 0.017  |
| 0         | 0.78071  | 0.865 | 0.78  | 0         | cancer ster | CYC1      | 0.085  |

|           |          |       |       |           |             |          |        |
|-----------|----------|-------|-------|-----------|-------------|----------|--------|
| 0         | 0.765345 | 0.895 | 0.828 | 0         | cancer ster | CEBPD    | 0.067  |
| 0         | 0.76424  | 0.8   | 0.638 | 0         | cancer ster | TMEM63A  | 0.162  |
| 0         | 0.735054 | 0.765 | 0.724 | 0         | cancer ster | TRIB1    | 0.041  |
| 0         | 0.728303 | 0.712 | 0.674 | 0         | cancer ster | MUC12    | 0.038  |
| 0         | 0.724465 | 0.767 | 0.763 | 0         | cancer ster | TSC22D1  | 0.004  |
| 0         | 0.650921 | 0.712 | 0.697 | 0         | cancer ster | ABHD11   | 0.015  |
| 0         | 0.647594 | 0.749 | 0.743 | 0         | cancer ster | STAP2    | 0.006  |
| 0         | 0.64199  | 0.851 | 0.713 | 0         | cancer ster | CD320    | 0.138  |
| 0         | 0.641173 | 0.722 | 0.713 | 0         | cancer ster | BACE2    | 0.009  |
| 0         | 0.634065 | 0.809 | 0.659 | 0         | cancer ster | SLC22A18 | 0.15   |
| 0         | 0.628752 | 0.786 | 0.708 | 0         | cancer ster | HIST1H2A | 0.078  |
| 0         | 0.6197   | 0.76  | 0.7   | 0         | cancer ster | AC245014 | 0.06   |
| 0         | 0.600208 | 0.791 | 0.667 | 0         | cancer ster | PCBD1    | 0.124  |
| 0         | 0.575193 | 0.797 | 0.688 | 0         | cancer ster | AC087239 | 0.109  |
| 0         | 0.572397 | 0.734 | 0.669 | 0         | cancer ster | DGAT1    | 0.065  |
| 0         | 0.567344 | 0.827 | 0.785 | 0         | cancer ster | NTHL1    | 0.042  |
| 0         | 0.561393 | 0.781 | 0.745 | 0         | cancer ster | HIST1H2A | 0.036  |
| 0         | 0.552848 | 0.737 | 0.704 | 0         | cancer ster | FTX      | 0.033  |
| 0         | 0.549912 | 0.799 | 0.743 | 0         | cancer ster | CEBPG    | 0.056  |
| 0         | 0.547787 | 0.73  | 0.662 | 0         | cancer ster | AC015912 | 0.068  |
| 0         | 0.547177 | 0.76  | 0.683 | 0         | cancer ster | MROH1    | 0.077  |
| 0         | 0.536682 | 0.847 | 0.756 | 0         | cancer ster | BOP1     | 0.091  |
| 0         | 0.511973 | 0.789 | 0.714 | 0         | cancer ster | PCK2     | 0.075  |
| 0         | 0.473709 | 0.754 | 0.714 | 0         | cancer ster | MGAT4B   | 0.04   |
| 0         | 0.460899 | 0.8   | 0.749 | 0         | cancer ster | EIF3B    | 0.051  |
| 0         | 0.43696  | 0.797 | 0.761 | 0         | cancer ster | IER5L    | 0.036  |
| 0         | 0.415516 | 0.806 | 0.712 | 0         | cancer ster | F12      | 0.094  |
| 0         | 0.405058 | 0.716 | 0.636 | 0         | cancer ster | HIST1H2B | 0.08   |
| 0         | 0.391562 | 0.816 | 0.74  | 0         | cancer ster | SLC52A2  | 0.076  |
| 0         | 0.313769 | 0.773 | 0.706 | 0         | cancer ster | EXOSC4   | 0.067  |
| 0         | 0.307094 | 0.744 | 0.625 | 0         | cancer ster | HIST1H2B | 0.119  |
| 0         | 0.29996  | 0.738 | 0.621 | 0         | cancer ster | NUDT14   | 0.117  |
| 0         | 0.299264 | 0.773 | 0.736 | 0         | cancer ster | COL9A3   | 0.037  |
| 0         | 0.280242 | 0.798 | 0.675 | 0         | cancer ster | SLC38A5  | 0.123  |
| 0         | 0.273157 | 0.786 | 0.758 | 0         | cancer ster | HAGHL    | 0.028  |
| 2.10E-304 | 0.679751 | 0.838 | 0.794 | 4.19E-301 | cancer ster | TIMM13   | 0.044  |
| 5.69E-298 | 0.60536  | 0.728 | 0.682 | 1.14E-294 | cancer ster | ITPR3    | 0.046  |
| 2.20E-290 | 0.361647 | 0.743 | 0.724 | 4.41E-287 | cancer ster | PMEPA1   | 0.019  |
| 7.29E-290 | 0.307806 | 0.755 | 0.68  | 1.46E-286 | cancer ster | AIMP2    | 0.075  |
| 1.00E-286 | 0.454529 | 0.743 | 0.745 | 2.01E-283 | cancer ster | PLEKHA5  | -0.002 |
| 9.48E-283 | 0.619802 | 0.709 | 0.714 | 1.90E-279 | cancer ster | UGDH     | -0.005 |
| 1.24E-282 | 0.568037 | 0.729 | 0.718 | 2.49E-279 | cancer ster | LMO7     | 0.011  |
| 5.37E-281 | 0.391201 | 0.744 | 0.736 | 1.07E-277 | cancer ster | DDX11    | 0.008  |
| 7.09E-275 | 1.013089 | 0.778 | 0.799 | 1.42E-271 | cancer ster | IER3     | -0.021 |
| 5.33E-273 | 0.786225 | 0.718 | 0.761 | 1.07E-269 | cancer ster | MYO7B    | -0.043 |
| 4.20E-270 | 0.374224 | 0.799 | 0.704 | 8.39E-267 | cancer ster | UQCC2    | 0.095  |
| 1.43E-268 | 0.652818 | 0.72  | 0.727 | 2.86E-265 | cancer ster | CD24     | -0.007 |
| 4.31E-266 | 0.424939 | 0.715 | 0.723 | 8.63E-263 | cancer ster | HIST1H2A | -0.008 |
| 5.35E-264 | 0.651    | 0.974 | 0.978 | 1.07E-260 | cancer ster | GAPDH    | -0.004 |
| 9.13E-264 | 0.406839 | 0.99  | 0.994 | 1.83E-260 | cancer ster | TMSB10   | -0.004 |
| 1.61E-263 | 0.75695  | 0.896 | 0.884 | 3.23E-260 | cancer ster | IFITM3   | 0.012  |
| 2.39E-263 | 0.332236 | 0.802 | 0.779 | 4.79E-260 | cancer ster | NOP16    | 0.023  |
| 7.76E-260 | 0.570445 | 0.735 | 0.704 | 1.55E-256 | cancer ster | KCNQ1OT  | 0.031  |
| 1.61E-246 | 0.315834 | 0.752 | 0.726 | 3.22E-243 | cancer ster | STXBP2   | 0.026  |
| 2.90E-245 | 0.360417 | 0.838 | 0.762 | 5.80E-242 | cancer ster | CCND2    | 0.076  |
| 2.59E-240 | 0.434845 | 0.71  | 0.693 | 5.18E-237 | cancer ster | KNOP1    | 0.017  |



|           |          |       |       |           |             |          |        |
|-----------|----------|-------|-------|-----------|-------------|----------|--------|
| 1.38E-238 | 0.452207 | 0.79  | 0.751 | 2.75E-235 | cancer ster | ZNF593   | 0.039  |
| 5.60E-237 | 0.787927 | 0.769 | 0.718 | 1.12E-233 | cancer ster | PLEC     | 0.051  |
| 1.02E-234 | 0.343368 | 0.742 | 0.661 | 2.04E-231 | cancer ster | POLD2    | 0.081  |
| 1.58E-232 | 0.305416 | 0.675 | 0.705 | 3.15E-229 | cancer ster | NEBL     | -0.03  |
| 3.09E-231 | 0.717453 | 0.919 | 0.903 | 6.19E-228 | cancer ster | S100A11  | 0.016  |
| 8.70E-220 | 0.411515 | 0.805 | 0.756 | 1.74E-216 | cancer ster | GK       | 0.049  |
| 2.05E-216 | 0.302603 | 0.725 | 0.695 | 4.11E-213 | cancer ster | TARBP1   | 0.03   |
| 8.52E-216 | 0.66042  | 0.829 | 0.751 | 1.70E-212 | cancer ster | SLC7A5   | 0.078  |
| 5.04E-215 | 0.632163 | 0.736 | 0.745 | 1.01E-211 | cancer ster | SPINT2   | -0.009 |
| 7.48E-214 | 0.635402 | 0.732 | 0.769 | 1.50E-210 | cancer ster | EPS8     | -0.037 |
| 1.11E-212 | 0.48643  | 0.671 | 0.674 | 2.21E-209 | cancer ster | SPPL2B   | -0.003 |
| 2.53E-212 | 0.286342 | 0.776 | 0.759 | 5.06E-209 | cancer ster | DNMT1    | 0.017  |
| 2.23E-211 | 0.474841 | 0.77  | 0.751 | 4.46E-208 | cancer ster | YWHAG    | 0.019  |
| 6.97E-210 | 0.429467 | 0.707 | 0.662 | 1.39E-206 | cancer ster | MCRIP2   | 0.045  |
| 7.93E-209 | 0.55215  | 0.708 | 0.735 | 1.59E-205 | cancer ster | NUAK2    | -0.027 |
| 3.88E-207 | 0.326867 | 0.675 | 0.65  | 7.75E-204 | cancer ster | PAXIP1-A | 0.025  |
| 4.78E-207 | 0.345566 | 0.765 | 0.723 | 9.56E-204 | cancer ster | USP38    | 0.042  |
| 2.04E-206 | 0.523259 | 0.755 | 0.782 | 4.07E-203 | cancer ster | TRAP1    | -0.027 |
| 9.89E-206 | 0.473287 | 0.717 | 0.721 | 1.98E-202 | cancer ster | SLC19A2  | -0.004 |
| 2.09E-201 | 0.556035 | 0.717 | 0.786 | 4.18E-198 | cancer ster | HES1     | -0.069 |
| 1.31E-196 | 0.524699 | 0.759 | 0.708 | 2.63E-193 | cancer ster | ARL6IP1  | 0.051  |
| 4.90E-195 | 0.329927 | 0.77  | 0.771 | 9.80E-192 | cancer ster | BRI3     | -0.001 |
| 1.89E-194 | 0.267418 | 0.72  | 0.718 | 3.77E-191 | cancer ster | HIST1H2B | 0.002  |
| 3.30E-194 | 0.354889 | 0.787 | 0.751 | 6.61E-191 | cancer ster | GGCT     | 0.036  |
| 6.75E-192 | 0.58663  | 0.691 | 0.726 | 1.35E-188 | cancer ster | HIST1H4B | -0.035 |
| 2.28E-191 | 0.483727 | 0.667 | 0.669 | 4.56E-188 | cancer ster | CDCA7    | -0.002 |
| 6.19E-191 | 0.287706 | 0.799 | 0.773 | 1.24E-187 | cancer ster | ZBTB10   | 0.026  |
| 3.52E-187 | 0.627303 | 0.831 | 0.814 | 7.03E-184 | cancer ster | PRDX5    | 0.017  |
| 1.37E-186 | 0.417538 | 0.703 | 0.678 | 2.75E-183 | cancer ster | DIAPH2   | 0.025  |
| 4.14E-184 | 0.82765  | 0.653 | 0.686 | 8.28E-181 | cancer ster | ATP1B1   | -0.033 |
| 1.65E-183 | 0.366876 | 0.731 | 0.758 | 3.29E-180 | cancer ster | MCM7     | -0.027 |
| 4.56E-181 | 0.513006 | 0.67  | 0.709 | 9.12E-178 | cancer ster | HIST1H3J | -0.039 |
| 5.29E-180 | 0.327027 | 0.725 | 0.695 | 1.06E-176 | cancer ster | CYB5A    | 0.03   |
| 4.08E-179 | 0.442599 | 0.64  | 0.64  | 8.15E-176 | cancer ster | PCCA     | 0      |
| 1.61E-173 | 0.437646 | 0.805 | 0.714 | 3.21E-170 | cancer ster | PHPT1    | 0.091  |
| 1.81E-167 | 0.418661 | 0.855 | 0.844 | 3.62E-164 | cancer ster | CEBPB    | 0.011  |
| 9.57E-166 | 0.564968 | 0.728 | 0.758 | 1.91E-162 | cancer ster | MPST     | -0.03  |
| 1.18E-164 | 0.472189 | 0.72  | 0.766 | 2.36E-161 | cancer ster | ICA1     | -0.046 |
| 3.06E-162 | 0.62474  | 0.714 | 0.773 | 6.12E-159 | cancer ster | ETS2     | -0.059 |
| 7.27E-160 | 0.347997 | 0.675 | 0.663 | 1.45E-156 | cancer ster | SBF2     | 0.012  |
| 1.87E-157 | 0.449986 | 0.659 | 0.689 | 3.75E-154 | cancer ster | HILPDA   | -0.03  |
| 1.76E-155 | 0.371047 | 0.728 | 0.701 | 3.52E-152 | cancer ster | IARS     | 0.027  |
| 2.20E-153 | 0.316374 | 0.716 | 0.758 | 4.40E-150 | cancer ster | PON2     | -0.042 |
| 3.06E-150 | 0.29559  | 0.651 | 0.666 | 6.13E-147 | cancer ster | HIST1H2A | -0.015 |
| 5.93E-149 | 0.478219 | 0.671 | 0.67  | 1.19E-145 | cancer ster | HIST1H3H | 0.001  |
| 6.20E-146 | 0.49152  | 0.68  | 0.695 | 1.24E-142 | cancer ster | HIST1H3A | -0.015 |
| 1.56E-145 | 0.679398 | 0.653 | 0.701 | 3.12E-142 | cancer ster | TPM1     | -0.048 |
| 1.97E-142 | 0.44941  | 0.838 | 0.759 | 3.93E-139 | cancer ster | DNPH1    | 0.079  |
| 1.04E-139 | 0.452946 | 0.672 | 0.643 | 2.08E-136 | cancer ster | SQLC     | 0.029  |
| 1.27E-139 | 0.300235 | 0.696 | 0.705 | 2.53E-136 | cancer ster | ILVBL    | -0.009 |
| 1.11E-137 | 0.643829 | 0.815 | 0.863 | 2.22E-134 | cancer ster | LMNA     | -0.048 |
| 3.23E-137 | 0.268408 | 0.693 | 0.657 | 6.45E-134 | cancer ster | UCHL3    | 0.036  |
| 8.62E-136 | 0.502093 | 0.862 | 0.862 | 1.72E-132 | cancer ster | PPA1     | 0      |
| 7.09E-135 | 0.277829 | 0.667 | 0.667 | 1.42E-131 | cancer ster | KIF9     | 0      |
| 1.06E-133 | 0.365159 | 0.809 | 0.792 | 2.12E-130 | cancer ster | EIF6     | 0.017  |
| 1.61E-132 | 0.302882 | 0.649 | 0.647 | 3.22E-129 | cancer ster | AC091271 | 0.002  |

|           |          |       |       |           |             |          |        |
|-----------|----------|-------|-------|-----------|-------------|----------|--------|
| 6.55E-132 | 0.499928 | 0.843 | 0.784 | 1.31E-128 | cancer ster | AL138963 | 0.059  |
| 1.88E-128 | 0.374739 | 0.706 | 0.701 | 3.76E-125 | cancer ster | MAP1LC3  | 0.005  |
| 5.49E-127 | 0.431065 | 0.756 | 0.776 | 1.10E-123 | cancer ster | AHCY     | -0.02  |
| 2.90E-126 | 0.503455 | 0.647 | 0.69  | 5.80E-123 | cancer ster | ASPH     | -0.043 |
| 4.97E-125 | 0.560617 | 0.663 | 0.707 | 9.94E-122 | cancer ster | AC023157 | -0.044 |
| 8.37E-125 | 0.338535 | 0.712 | 0.709 | 1.67E-121 | cancer ster | HIST1H2B | 0.003  |
| 2.58E-123 | 0.711158 | 0.689 | 0.728 | 5.15E-120 | cancer ster | HIST1H2A | -0.039 |
| 1.15E-122 | 0.511388 | 0.68  | 0.696 | 2.29E-119 | cancer ster | AGPAT2   | -0.016 |
| 3.05E-121 | 0.328516 | 0.701 | 0.692 | 6.11E-118 | cancer ster | SH3YL1   | 0.009  |
| 3.15E-118 | 0.738873 | 0.885 | 0.878 | 6.31E-115 | cancer ster | ATF3     | 0.007  |
| 3.93E-118 | 0.619242 | 0.648 | 0.688 | 7.85E-115 | cancer ster | GMDS     | -0.04  |
| 4.30E-115 | 0.362417 | 0.719 | 0.768 | 8.61E-112 | cancer ster | C19orf48 | -0.049 |
| 7.86E-113 | 0.470459 | 0.712 | 0.756 | 1.57E-109 | cancer ster | BLVRB    | -0.044 |
| 7.87E-113 | 0.282896 | 0.688 | 0.652 | 1.57E-109 | cancer ster | AP1S1    | 0.036  |
| 1.28E-112 | 0.495743 | 0.824 | 0.824 | 2.56E-109 | cancer ster | CHCHD10  | 0      |
| 8.61E-110 | 0.790569 | 0.722 | 0.781 | 1.72E-106 | cancer ster | PLK2     | -0.059 |
| 3.37E-109 | 0.292945 | 0.772 | 0.734 | 6.74E-106 | cancer ster | FKBP4    | 0.038  |
| 1.36E-108 | 0.420633 | 0.733 | 0.727 | 2.73E-105 | cancer ster | CISD3    | 0.006  |
| 1.75E-108 | 0.53705  | 0.642 | 0.686 | 3.50E-105 | cancer ster | ANXA4    | -0.044 |
| 5.73E-106 | 0.321755 | 0.629 | 0.6   | 1.15E-102 | cancer ster | RALGAPA  | 0.029  |
| 1.34E-105 | 0.274591 | 0.729 | 0.747 | 2.68E-102 | cancer ster | DGKD     | -0.018 |
| 7.00E-104 | 0.427348 | 0.685 | 0.737 | 1.40E-100 | cancer ster | HIP1R    | -0.052 |
| 1.49E-103 | 0.306568 | 0.603 | 0.549 | 2.99E-100 | cancer ster | MICAL3   | 0.054  |
| 6.33E-102 | 0.845213 | 0.735 | 0.855 | 1.27E-98  | cancer ster | KLF4     | -0.12  |
| 1.88E-100 | 0.651006 | 0.75  | 0.797 | 3.76E-97  | cancer ster | ACTN4    | -0.047 |
| 6.96E-98  | 0.33188  | 0.702 | 0.684 | 1.39E-94  | cancer ster | PLCG2    | 0.018  |
| 8.54E-98  | 0.333356 | 0.614 | 0.599 | 1.71E-94  | cancer ster | FASN     | 0.015  |
| 3.83E-96  | 0.340361 | 0.686 | 0.704 | 7.65E-93  | cancer ster | HELZ2    | -0.018 |
| 1.04E-95  | 0.458353 | 0.666 | 0.709 | 2.08E-92  | cancer ster | TMEM141  | -0.043 |
| 1.17E-95  | 0.541384 | 0.954 | 0.968 | 2.34E-92  | cancer ster | HMGB1    | -0.014 |
| 6.78E-95  | 0.52656  | 0.726 | 0.824 | 1.36E-91  | cancer ster | CD151    | -0.098 |
| 7.86E-91  | 0.310678 | 0.908 | 0.996 | 1.57E-87  | cancer ster | MTRNR2L  | -0.088 |
| 7.79E-90  | 0.486106 | 0.648 | 0.713 | 1.56E-86  | cancer ster | EPHX2    | -0.065 |
| 8.24E-84  | 0.362178 | 0.609 | 0.659 | 1.65E-80  | cancer ster | HIST1H3C | -0.05  |
| 1.89E-83  | 0.444643 | 0.753 | 0.786 | 3.79E-80  | cancer ster | CHMP4B   | -0.033 |
| 2.39E-83  | 0.38309  | 0.647 | 0.673 | 4.78E-80  | cancer ster | MKI67    | -0.026 |
| 6.30E-81  | 0.271134 | 0.785 | 0.763 | 1.26E-77  | cancer ster | EBPL     | 0.022  |
| 3.43E-79  | 0.52962  | 0.63  | 0.714 | 6.86E-76  | cancer ster | PLXNB2   | -0.084 |
| 7.89E-78  | 0.328898 | 0.741 | 0.736 | 1.58E-74  | cancer ster | TRAF5    | 0.005  |
| 1.33E-77  | 0.433722 | 0.684 | 0.764 | 2.66E-74  | cancer ster | PDLIM1   | -0.08  |
| 1.31E-76  | 0.337089 | 0.665 | 0.687 | 2.61E-73  | cancer ster | HIST1H2B | -0.022 |
| 5.21E-75  | 0.42933  | 0.743 | 0.767 | 1.04E-71  | cancer ster | PTMS     | -0.024 |
| 2.12E-69  | 0.614033 | 0.62  | 0.69  | 4.24E-66  | cancer ster | MYO1E    | -0.07  |
| 5.55E-69  | 0.567201 | 0.737 | 0.757 | 1.11E-65  | cancer ster | MXD1     | -0.02  |
| 5.69E-69  | 0.358079 | 0.7   | 0.707 | 1.14E-65  | cancer ster | NORAD    | -0.007 |
| 7.81E-69  | 0.308008 | 0.683 | 0.679 | 1.56E-65  | cancer ster | SRSF6    | 0.004  |
| 2.01E-68  | 0.37605  | 0.752 | 0.785 | 4.01E-65  | cancer ster | INTS6    | -0.033 |
| 4.19E-68  | 0.544644 | 0.881 | 0.942 | 8.37E-65  | cancer ster | SAT1     | -0.061 |
| 1.26E-66  | 0.451384 | 0.688 | 0.74  | 2.53E-63  | cancer ster | ZKSCAN1  | -0.052 |
| 1.88E-66  | 0.572758 | 0.708 | 0.714 | 3.77E-63  | cancer ster | HIST1H1E | -0.006 |
| 3.98E-65  | 0.470536 | 0.662 | 0.753 | 7.96E-62  | cancer ster | APP      | -0.091 |
| 1.18E-61  | 0.498084 | 0.832 | 0.844 | 2.37E-58  | cancer ster | CSTB     | -0.012 |
| 2.45E-60  | 0.464598 | 0.852 | 0.879 | 4.91E-57  | cancer ster | NME2     | -0.027 |
| 1.64E-59  | 0.434442 | 0.781 | 0.774 | 3.29E-56  | cancer ster | HMGA1    | 0.007  |
| 2.59E-58  | 0.41198  | 0.814 | 0.825 | 5.18E-55  | cancer ster | RPS27L   | -0.011 |
| 5.72E-58  | 0.280931 | 0.695 | 0.743 | 1.14E-54  | cancer ster | GIPC1    | -0.048 |

|           |          |       |       |           |             |          |        |
|-----------|----------|-------|-------|-----------|-------------|----------|--------|
| 1.67E-57  | 0.266318 | 0.629 | 0.605 | 3.35E-54  | cancer ster | ACSL5    | 0.024  |
| 2.64E-56  | 0.301337 | 0.568 | 0.595 | 5.28E-53  | cancer ster | HIST1H4D | -0.027 |
| 3.67E-56  | 0.495268 | 0.604 | 0.695 | 7.34E-53  | cancer ster | TNFRSF12 | -0.091 |
| 1.19E-52  | 0.346966 | 0.773 | 0.767 | 2.38E-49  | cancer ster | PHB      | 0.006  |
| 1.59E-50  | 0.298503 | 0.67  | 0.652 | 3.18E-47  | cancer ster | HIST1H1C | 0.018  |
| 2.98E-48  | 0.322549 | 0.818 | 0.841 | 5.96E-45  | cancer ster | FABP5    | -0.023 |
| 1.66E-44  | 0.406909 | 0.609 | 0.682 | 3.32E-41  | cancer ster | HDHD3    | -0.073 |
| 2.30E-44  | 0.72698  | 0.916 | 0.927 | 4.60E-41  | cancer ster | HSPH1    | -0.011 |
| 2.39E-44  | 0.579488 | 0.919 | 0.958 | 4.77E-41  | cancer ster | IER2     | -0.039 |
| 1.36E-42  | 0.317197 | 0.584 | 0.624 | 2.73E-39  | cancer ster | PYGB     | -0.04  |
| 5.71E-41  | 0.489914 | 0.766 | 0.789 | 1.14E-37  | cancer ster | TPM4     | -0.023 |
| 1.22E-39  | 0.386571 | 0.568 | 0.589 | 2.44E-36  | cancer ster | PIK3R3   | -0.021 |
| 4.06E-39  | 0.324824 | 0.651 | 0.752 | 8.13E-36  | cancer ster | LSR      | -0.101 |
| 5.83E-39  | 0.310696 | 0.597 | 0.579 | 1.17E-35  | cancer ster | RMRP     | 0.018  |
| 9.99E-39  | 0.356623 | 0.828 | 0.878 | 2.00E-35  | cancer ster | RAC1     | -0.05  |
| 3.36E-37  | 0.37118  | 0.686 | 0.752 | 6.71E-34  | cancer ster | CENPX    | -0.066 |
| 3.48E-36  | 0.343657 | 0.554 | 0.63  | 6.97E-33  | cancer ster | NQO1     | -0.076 |
| 1.82E-35  | 0.273587 | 0.517 | 0.703 | 3.63E-32  | cancer ster | NCOA7    | -0.186 |
| 1.60E-34  | 0.438854 | 0.549 | 0.649 | 3.20E-31  | cancer ster | GALE     | -0.1   |
| 4.89E-34  | 0.269425 | 0.653 | 0.719 | 9.78E-31  | cancer ster | GPHN     | -0.066 |
| 1.25E-33  | 0.468982 | 0.671 | 0.745 | 2.49E-30  | cancer ster | HDLBP    | -0.074 |
| 1.91E-33  | 0.285981 | 0.688 | 0.7   | 3.81E-30  | cancer ster | SLC20A1  | -0.012 |
| 9.12E-31  | 0.285156 | 0.816 | 0.806 | 1.82E-27  | cancer ster | NUCKS1   | 0.01   |
| 1.74E-29  | 0.610147 | 0.891 | 0.924 | 3.47E-26  | cancer ster | EGR1     | -0.033 |
| 2.35E-28  | 0.292308 | 0.675 | 0.711 | 4.70E-25  | cancer ster | IRF2BP2  | -0.036 |
| 1.15E-27  | 0.332244 | 0.604 | 0.669 | 2.30E-24  | cancer ster | HIST1H2B | -0.065 |
| 1.36E-26  | 0.322269 | 0.867 | 0.88  | 2.72E-23  | cancer ster | TPI1     | -0.013 |
| 5.68E-25  | 0.281796 | 0.546 | 0.57  | 1.14E-21  | cancer ster | HIST2H2B | -0.024 |
| 3.38E-22  | 0.334233 | 0.677 | 0.709 | 6.76E-19  | cancer ster | FDPS     | -0.032 |
| 7.53E-22  | 0.287125 | 0.593 | 0.669 | 1.51E-18  | cancer ster | LGALS3BI | -0.076 |
| 1.61E-21  | 0.29056  | 0.621 | 0.668 | 3.22E-18  | cancer ster | TRAPPC9  | -0.047 |
| 4.98E-21  | 0.356152 | 0.485 | 0.658 | 9.96E-18  | cancer ster | ANKRD36  | -0.173 |
| 3.37E-20  | 0.283284 | 0.705 | 0.736 | 6.73E-17  | cancer ster | SLC25A39 | -0.031 |
| 2.72E-18  | 0.293434 | 0.691 | 0.697 | 5.45E-15  | cancer ster | AL118516 | -0.006 |
| 1.43E-17  | 0.29508  | 0.533 | 0.739 | 2.87E-14  | cancer ster | HMGCS1   | -0.206 |
| 1.99E-17  | 0.273396 | 0.551 | 0.625 | 3.97E-14  | cancer ster | MYO19    | -0.074 |
| 2.62E-16  | 0.482676 | 0.6   | 0.674 | 5.23E-13  | cancer ster | LENG8    | -0.074 |
| 7.31E-16  | 0.379886 | 0.79  | 0.869 | 1.46E-12  | cancer ster | RHOB     | -0.079 |
| 1.23E-14  | 0.309503 | 0.631 | 0.695 | 2.46E-11  | cancer ster | SUGP2    | -0.064 |
| 4.04E-12  | 0.37386  | 0.598 | 0.699 | 8.08E-09  | cancer ster | CSRNP2   | -0.101 |
| 5.10E-12  | 0.349258 | 0.698 | 0.809 | 1.02E-08  | cancer ster | NUDT4    | -0.111 |
| 1.59E-10  | 0.288291 | 0.575 | 0.673 | 3.17E-07  | cancer ster | SLC9A1   | -0.098 |
| 2.55E-10  | 0.30076  | 0.554 | 0.638 | 5.10E-07  | cancer ster | CTNNA1   | -0.084 |
| 3.37E-10  | 0.448724 | 0.579 | 0.701 | 6.74E-07  | cancer ster | NPDC1    | -0.122 |
| 1.04E-09  | 0.487401 | 0.907 | 0.946 | 2.08E-06  | cancer ster | HSPA1B   | -0.039 |
| 9.15E-09  | 0.265495 | 0.606 | 0.711 | 1.83E-05  | cancer ster | ISOC2    | -0.105 |
| 1.54E-08  | 0.375394 | 0.537 | 0.636 | 3.08E-05  | cancer ster | CYSTM1   | -0.099 |
| 1.58E-08  | 0.269762 | 0.582 | 0.64  | 3.17E-05  | cancer ster | AL135925 | -0.058 |
| 1.83E-08  | 0.329806 | 0.688 | 0.773 | 3.66E-05  | cancer ster | GADD45G  | -0.085 |
| 6.94E-08  | 0.382251 | 0.769 | 0.8   | 0.000139  | cancer ster | GLUD1    | -0.031 |
| 2.44E-07  | 0.275269 | 0.618 | 0.706 | 0.000489  | cancer ster | CENPF    | -0.088 |
| 3.92E-06  | 0.271106 | 0.513 | 0.599 | 0.007832  | cancer ster | MYO1C    | -0.086 |
| 4.84E-06  | 0.468654 | 0.611 | 0.731 | 0.009676  | cancer ster | RAB11FIP | -0.12  |
| 9.54E-06  | 0.268095 | 0.513 | 0.583 | 0.01908   | cancer ster | GFPT1    | -0.07  |
| 4.36E-166 | 1.881617 | 0.983 | 0.576 | 8.73E-163 | endothelial | PECAM1   | 0.407  |
| 7.11E-140 | 1.159299 | 0.969 | 0.679 | 1.42E-136 | endothelial | NPDC1    | 0.29   |

|           |          |       |       |           |                          |       |
|-----------|----------|-------|-------|-----------|--------------------------|-------|
| 1.31E-128 | 1.426316 | 0.927 | 0.656 | 2.63E-125 | endothelial ENG          | 0.271 |
| 2.58E-117 | 1.193816 | 1     | 0.895 | 5.17E-114 | endothelial VIM          | 0.105 |
| 1.11E-105 | 1.267896 | 0.976 | 0.885 | 2.21E-102 | endothelial IFITM3       | 0.091 |
| 1.62E-94  | 0.969946 | 0.958 | 0.778 | 3.24E-91  | endothelial FKBP1A       | 0.18  |
| 3.57E-93  | 0.835004 | 0.868 | 0.523 | 7.14E-90  | endothelial PLXND1       | 0.345 |
| 4.36E-93  | 0.88513  | 0.927 | 0.737 | 8.72E-90  | endothelial APP          | 0.19  |
| 6.12E-90  | 0.277423 | 0.962 | 0.689 | 1.22E-86  | endothelial SFXN3        | 0.273 |
| 6.73E-90  | 0.958664 | 0.882 | 0.653 | 1.35E-86  | endothelial TCF4         | 0.229 |
| 3.46E-86  | 0.443402 | 0.948 | 0.661 | 6.92E-83  | endothelial PLA2G16      | 0.287 |
| 1.34E-84  | 0.417483 | 0.944 | 0.601 | 2.69E-81  | endothelial TPST2        | 0.343 |
| 3.65E-79  | 0.283713 | 0.931 | 0.699 | 7.29E-76  | endothelial PLXNB2       | 0.232 |
| 8.74E-79  | 0.332124 | 0.941 | 0.641 | 1.75E-75  | endothelial RUVBL2       | 0.3   |
| 3.95E-76  | 0.871676 | 0.844 | 0.651 | 7.91E-73  | endothelial MCAM         | 0.193 |
| 7.51E-76  | 0.759901 | 0.896 | 0.701 | 1.50E-72  | endothelial SPTBN1       | 0.195 |
| 2.27E-75  | 0.908706 | 0.924 | 0.794 | 4.54E-72  | endothelial ID3          | 0.13  |
| 7.07E-74  | 0.565079 | 0.889 | 0.75  | 1.41E-70  | endothelial PON2         | 0.139 |
| 3.89E-73  | 0.368767 | 0.934 | 0.657 | 7.77E-70  | endothelial PSMG4        | 0.277 |
| 1.05E-70  | 0.807047 | 0.872 | 0.75  | 2.10E-67  | endothelial PDLIM1       | 0.122 |
| 2.00E-70  | 0.851362 | 0.906 | 0.668 | 4.00E-67  | endothelial ICAM2        | 0.238 |
| 2.99E-69  | 0.784197 | 0.948 | 0.813 | 5.98E-66  | endothelial SELENOW0.135 |       |
| 1.20E-66  | 0.562723 | 0.955 | 0.684 | 2.39E-63  | endothelial SELENOS      | 0.271 |
| 7.43E-66  | 0.732337 | 0.868 | 0.649 | 1.49E-62  | endothelial STOM         | 0.219 |
| 1.26E-65  | 0.665811 | 0.924 | 0.722 | 2.53E-62  | endothelial CD63         | 0.202 |
| 3.28E-65  | 0.747815 | 0.934 | 0.755 | 6.56E-62  | endothelial TIMP1        | 0.179 |
| 4.06E-65  | 0.38491  | 0.924 | 0.716 | 8.12E-62  | endothelial DDAH2        | 0.208 |
| 1.06E-64  | 0.776778 | 0.83  | 0.583 | 2.13E-61  | endothelial PIK3R3       | 0.247 |
| 4.93E-64  | 0.824641 | 0.868 | 0.731 | 9.87E-61  | endothelial ITGB1        | 0.137 |
| 1.75E-62  | 0.801751 | 0.844 | 0.64  | 3.51E-59  | endothelial PLPP1        | 0.204 |
| 3.00E-61  | 0.643945 | 0.882 | 0.762 | 6.01E-58  | endothelial PTMS         | 0.12  |
| 1.84E-60  | 0.46034  | 0.837 | 0.761 | 3.67E-57  | endothelial KIAA1211     | 0.076 |
| 3.83E-60  | 0.860914 | 0.858 | 0.815 | 7.67E-57  | endothelial ID1          | 0.043 |
| 9.75E-60  | 0.784791 | 0.826 | 0.645 | 1.95E-56  | endothelial SERPINH1     | 0.181 |
| 1.88E-58  | 0.823944 | 0.896 | 0.758 | 3.77E-55  | endothelial ANXA2        | 0.138 |
| 4.47E-58  | 0.713663 | 0.906 | 0.792 | 8.93E-55  | endothelial CD81         | 0.114 |
| 1.12E-56  | 0.534894 | 0.878 | 0.688 | 2.24E-53  | endothelial PHACTR2      | 0.19  |
| 3.68E-56  | 0.511327 | 0.799 | 0.557 | 7.35E-53  | endothelial GIMAP8       | 0.242 |
| 3.76E-56  | 0.700627 | 0.844 | 0.698 | 7.53E-53  | endothelial PTTG1IP      | 0.146 |
| 8.15E-56  | 1.107466 | 0.913 | 0.837 | 1.63E-52  | endothelial FABP5        | 0.076 |
| 1.66E-55  | 0.486741 | 0.941 | 0.689 | 3.32E-52  | endothelial MAGED2       | 0.252 |
| 2.96E-53  | 0.746265 | 0.903 | 0.771 | 5.92E-50  | endothelial DSTN         | 0.132 |
| 2.92E-51  | 0.300883 | 0.851 | 0.611 | 5.85E-48  | endothelial LRRC8C       | 0.24  |
| 1.21E-49  | 0.485731 | 0.941 | 0.87  | 2.42E-46  | endothelial RAC1         | 0.071 |
| 2.41E-49  | 0.689434 | 0.927 | 0.857 | 4.83E-46  | endothelial RHOB         | 0.07  |
| 6.17E-49  | 0.605225 | 0.92  | 0.83  | 1.23E-45  | endothelial MARCKSI      | 0.09  |
| 2.42E-48  | 0.702153 | 0.99  | 0.904 | 4.83E-45  | endothelial IFITM1       | 0.086 |
| 2.67E-48  | 0.540964 | 0.861 | 0.762 | 5.33E-45  | endothelial TSC22D1      | 0.099 |
| 2.58E-47  | 0.601055 | 0.83  | 0.707 | 5.15E-44  | endothelial TNFRSF1A     | 0.123 |
| 3.02E-47  | 0.754809 | 0.854 | 0.809 | 6.05E-44  | endothelial CD151        | 0.045 |
| 6.48E-47  | 0.311971 | 0.868 | 0.674 | 1.30E-43  | endothelial SMC6         | 0.194 |
| 1.05E-46  | 0.362914 | 0.962 | 0.735 | 2.09E-43  | endothelial ATOX1        | 0.227 |
| 1.17E-46  | 0.273145 | 0.809 | 0.501 | 2.34E-43  | endothelial FBLN5        | 0.308 |
| 1.79E-46  | 0.283295 | 0.833 | 0.648 | 3.59E-43  | endothelial DENND3       | 0.185 |
| 3.48E-46  | 0.355658 | 0.934 | 0.737 | 6.96E-43  | endothelial CHST12       | 0.197 |
| 4.03E-46  | 0.393185 | 1     | 0.993 | 8.07E-43  | endothelial TMSB10       | 0.007 |
| 1.21E-45  | 0.41444  | 0.854 | 0.616 | 2.41E-42  | endothelial ELMO1        | 0.238 |
| 5.39E-45  | 0.442353 | 0.844 | 0.757 | 1.08E-41  | endothelial ADGRG1       | 0.087 |

|          |          |       |       |          |                      |       |
|----------|----------|-------|-------|----------|----------------------|-------|
| 1.06E-44 | 0.27667  | 0.84  | 0.609 | 2.13E-41 | endothelial AAMDC    | 0.231 |
| 1.26E-43 | 0.632058 | 0.854 | 0.727 | 2.52E-40 | endothelial LAPT4A   | 0.127 |
| 1.66E-43 | 0.42015  | 0.934 | 0.772 | 3.31E-40 | endothelial COMT     | 0.162 |
| 1.66E-43 | 0.706371 | 0.868 | 0.685 | 3.32E-40 | endothelial AHNAK    | 0.183 |
| 5.19E-43 | 0.416538 | 0.799 | 0.514 | 1.04E-39 | endothelial GBP4     | 0.285 |
| 3.17E-42 | 0.487803 | 0.84  | 0.692 | 6.33E-39 | endothelial TPM1     | 0.148 |
| 3.63E-42 | 0.683465 | 0.764 | 0.617 | 7.27E-39 | endothelial VAT1     | 0.147 |
| 1.41E-41 | 0.425393 | 0.778 | 0.58  | 2.81E-38 | endothelial PLEKHG1  | 0.198 |
| 4.05E-41 | 0.404215 | 0.917 | 0.784 | 8.09E-38 | endothelial TPM4     | 0.133 |
| 6.53E-41 | 0.435327 | 0.868 | 0.683 | 1.31E-37 | endothelial EI24     | 0.185 |
| 1.33E-40 | 0.610054 | 0.778 | 0.607 | 2.66E-37 | endothelial APLP2    | 0.171 |
| 4.14E-40 | 0.390757 | 0.913 | 0.855 | 8.28E-37 | endothelial LMNA     | 0.058 |
| 5.46E-40 | 0.342861 | 0.955 | 0.766 | 1.09E-36 | endothelial ANXA1    | 0.189 |
| 7.13E-40 | 0.419098 | 0.799 | 0.658 | 1.43E-36 | endothelial SCARB2   | 0.141 |
| 1.24E-39 | 0.706168 | 0.75  | 0.584 | 2.49E-36 | endothelial RDX      | 0.166 |
| 6.27E-39 | 0.390293 | 0.76  | 0.54  | 1.25E-35 | endothelial QKI      | 0.22  |
| 8.47E-39 | 0.505456 | 0.753 | 0.519 | 1.69E-35 | endothelial LMCD1    | 0.234 |
| 1.15E-38 | 0.350832 | 0.892 | 0.691 | 2.29E-35 | endothelial IFNGR1   | 0.201 |
| 1.30E-38 | 0.500656 | 0.757 | 0.607 | 2.60E-35 | endothelial PKP4     | 0.15  |
| 3.07E-38 | 0.342164 | 0.854 | 0.745 | 6.13E-35 | endothelial HEBP1    | 0.109 |
| 4.72E-37 | 0.390758 | 0.833 | 0.694 | 9.44E-34 | endothelial NME4     | 0.139 |
| 4.82E-37 | 0.48387  | 0.809 | 0.752 | 9.65E-34 | endothelial FCGRT    | 0.057 |
| 5.12E-37 | 0.416413 | 0.851 | 0.775 | 1.02E-33 | endothelial HES1     | 0.076 |
| 7.52E-37 | 0.373377 | 0.993 | 0.968 | 1.50E-33 | endothelial ACTG1    | 0.025 |
| 1.27E-35 | 0.487122 | 0.84  | 0.666 | 2.54E-32 | endothelial LGALS1   | 0.174 |
| 1.34E-35 | 0.39001  | 0.75  | 0.519 | 2.67E-32 | endothelial FMNL3    | 0.231 |
| 1.99E-35 | 0.552342 | 0.83  | 0.725 | 3.97E-32 | endothelial PLEC     | 0.105 |
| 3.37E-35 | 0.47678  | 0.802 | 0.638 | 6.73E-32 | endothelial VAMP3    | 0.164 |
| 6.38E-35 | 0.605406 | 0.781 | 0.658 | 1.28E-31 | endothelial SH3BP5   | 0.123 |
| 1.28E-34 | 0.564929 | 0.75  | 0.632 | 2.56E-31 | endothelial BEX3     | 0.118 |
| 1.45E-34 | 0.623409 | 0.757 | 0.655 | 2.91E-31 | endothelial ECE1     | 0.102 |
| 3.96E-34 | 0.395863 | 0.823 | 0.661 | 7.91E-31 | endothelial LUZP1    | 0.162 |
| 4.01E-34 | 0.303689 | 0.795 | 0.635 | 8.03E-31 | endothelial FAM241A  | 0.16  |
| 6.38E-34 | 0.639334 | 0.799 | 0.704 | 1.28E-30 | endothelial ATP1B3   | 0.095 |
| 8.32E-34 | 0.275041 | 0.795 | 0.683 | 1.66E-30 | endothelial GFOD1    | 0.112 |
| 9.79E-34 | 0.277401 | 0.812 | 0.744 | 1.96E-30 | endothelial GRASP    | 0.068 |
| 1.77E-33 | 0.577059 | 0.743 | 0.677 | 3.53E-30 | endothelial COL18A1  | 0.066 |
| 2.55E-33 | 0.433742 | 1     | 0.983 | 5.09E-30 | endothelial MTRNR2L0 | 0.017 |
| 6.82E-33 | 0.36748  | 0.979 | 0.759 | 1.36E-29 | endothelial OSTC     | 0.22  |
| 1.14E-32 | 0.27454  | 0.84  | 0.77  | 2.28E-29 | endothelial BRI3     | 0.07  |
| 1.87E-32 | 0.277509 | 0.92  | 0.746 | 3.74E-29 | endothelial NASP     | 0.174 |
| 2.10E-32 | 0.530532 | 0.993 | 0.915 | 4.21E-29 | endothelial DDIT4    | 0.078 |
| 3.35E-32 | 0.454163 | 0.812 | 0.702 | 6.69E-29 | endothelial MLEC     | 0.11  |
| 1.18E-31 | 0.503174 | 0.819 | 0.724 | 2.36E-28 | endothelial FLNA     | 0.095 |
| 2.25E-31 | 0.325457 | 0.889 | 0.685 | 4.49E-28 | endothelial COA3     | 0.204 |
| 2.99E-31 | 0.367407 | 0.983 | 0.952 | 5.99E-28 | endothelial H3F3A    | 0.031 |
| 5.29E-31 | 0.519203 | 0.802 | 0.669 | 1.06E-27 | endothelial VAMP5    | 0.133 |
| 5.44E-31 | 0.600127 | 0.753 | 0.633 | 1.09E-27 | endothelial NFIC     | 0.12  |
| 3.62E-30 | 0.408669 | 0.788 | 0.645 | 7.24E-27 | endothelial IKBIP    | 0.143 |
| 8.53E-30 | 0.55888  | 0.944 | 0.779 | 1.71E-26 | endothelial MT2A     | 0.165 |
| 1.73E-29 | 0.440084 | 0.799 | 0.703 | 3.45E-26 | endothelial GRN      | 0.096 |
| 3.16E-29 | 0.441632 | 0.899 | 0.762 | 6.32E-26 | endothelial SOCS3    | 0.137 |
| 8.19E-29 | 0.440755 | 0.844 | 0.712 | 1.64E-25 | endothelial NPC2     | 0.132 |
| 8.22E-29 | 0.496678 | 0.875 | 0.672 | 1.64E-25 | endothelial BST2     | 0.203 |
| 2.47E-28 | 0.623365 | 0.691 | 0.477 | 4.94E-25 | endothelial NOTCH4   | 0.214 |
| 5.61E-28 | 0.533344 | 0.774 | 0.617 | 1.12E-24 | endothelial TNFSF10  | 0.157 |

|          |          |       |       |          |                     |       |
|----------|----------|-------|-------|----------|---------------------|-------|
| 5.75E-28 | 0.579282 | 0.785 | 0.728 | 1.15E-24 | endothelial CD9     | 0.057 |
| 5.83E-28 | 0.553941 | 0.74  | 0.624 | 1.17E-24 | endothelial CTNNA1  | 0.116 |
| 7.75E-28 | 0.339057 | 0.927 | 0.764 | 1.55E-24 | endothelial TXNDC17 | 0.163 |
| 1.10E-27 | 0.608834 | 0.694 | 0.557 | 2.20E-24 | endothelial HEG1    | 0.137 |
| 3.74E-27 | 0.395139 | 0.76  | 0.615 | 7.48E-24 | endothelial MEF2A   | 0.145 |
| 4.61E-27 | 0.289063 | 0.753 | 0.585 | 9.22E-24 | endothelial CEP170  | 0.168 |
| 6.39E-27 | 0.420449 | 0.934 | 0.815 | 1.28E-23 | endothelial PRDX1   | 0.119 |
| 1.18E-26 | 0.477371 | 0.83  | 0.74  | 2.37E-23 | endothelial GIMAP4  | 0.09  |
| 1.19E-26 | 0.42009  | 0.74  | 0.631 | 2.39E-23 | endothelial SWAP70  | 0.109 |
| 1.55E-25 | 0.412852 | 0.823 | 0.686 | 3.10E-22 | endothelial CSRP1   | 0.137 |
| 2.64E-25 | 0.433272 | 0.872 | 0.732 | 5.28E-22 | endothelial DUT     | 0.14  |
| 3.53E-25 | 0.33267  | 0.941 | 0.925 | 7.06E-22 | endothelial S100A10 | 0.016 |
| 3.57E-25 | 0.439639 | 0.764 | 0.69  | 7.13E-22 | endothelial NEDD9   | 0.074 |
| 3.93E-25 | 0.325469 | 0.757 | 0.646 | 7.87E-22 | endothelial CTSL    | 0.111 |
| 4.96E-25 | 0.363318 | 0.712 | 0.54  | 9.92E-22 | endothelial RTL8A   | 0.172 |
| 8.70E-25 | 0.352713 | 0.785 | 0.65  | 1.74E-21 | endothelial PICALM  | 0.135 |
| 1.08E-22 | 0.331016 | 0.826 | 0.659 | 2.17E-19 | endothelial GIMAP6  | 0.167 |
| 1.32E-22 | 0.489346 | 0.74  | 0.699 | 2.63E-19 | endothelial SPRY1   | 0.041 |
| 2.91E-22 | 0.421323 | 0.785 | 0.698 | 5.83E-19 | endothelial CYB5A   | 0.087 |
| 3.06E-22 | 0.349922 | 0.882 | 0.79  | 6.12E-19 | endothelial HSP90B1 | 0.092 |
| 3.93E-22 | 0.368755 | 0.767 | 0.636 | 7.85E-19 | endothelial NUDT14  | 0.131 |
| 6.02E-22 | 0.332753 | 0.934 | 0.847 | 1.20E-18 | endothelial TUBB    | 0.087 |
| 7.68E-22 | 0.280451 | 0.819 | 0.649 | 1.54E-18 | endothelial PREX1   | 0.17  |
| 1.37E-21 | 0.284658 | 0.851 | 0.837 | 2.74E-18 | endothelial KLF4    | 0.014 |
| 1.94E-21 | 0.280703 | 0.753 | 0.639 | 3.89E-18 | endothelial MAPK3   | 0.114 |
| 1.95E-21 | 0.38297  | 0.802 | 0.709 | 3.89E-18 | endothelial ANXA5   | 0.093 |
| 2.14E-21 | 0.36689  | 0.854 | 0.789 | 4.28E-18 | endothelial ACTN4   | 0.065 |
| 4.67E-21 | 0.266151 | 0.861 | 0.739 | 9.35E-18 | endothelial HSBP1   | 0.122 |
| 1.10E-20 | 0.399296 | 0.83  | 0.683 | 2.21E-17 | endothelial ITM2A   | 0.147 |
| 2.01E-20 | 0.31607  | 0.681 | 0.549 | 4.02E-17 | endothelial RBMS2   | 0.132 |
| 3.88E-20 | 0.538672 | 0.698 | 0.653 | 7.77E-17 | endothelial TMEM204 | 0.045 |
| 4.03E-20 | 0.306708 | 0.823 | 0.674 | 8.06E-17 | endothelial HEXB    | 0.149 |
| 5.14E-20 | 0.322701 | 0.951 | 0.814 | 1.03E-16 | endothelial H2AFY   | 0.137 |
| 5.39E-20 | 0.594876 | 0.736 | 0.669 | 1.08E-16 | endothelial PRCP    | 0.067 |
| 7.33E-20 | 0.335126 | 0.91  | 0.729 | 1.47E-16 | endothelial TALDO1  | 0.181 |
| 2.16E-19 | 0.46823  | 0.694 | 0.559 | 4.31E-16 | endothelial ITGA1   | 0.135 |
| 2.61E-19 | 0.416442 | 0.729 | 0.662 | 5.23E-16 | endothelial SEC14L1 | 0.067 |
| 5.63E-19 | 0.496105 | 0.67  | 0.581 | 1.13E-15 | endothelial LIMS2   | 0.089 |
| 6.25E-19 | 0.274511 | 0.701 | 0.613 | 1.25E-15 | endothelial SGCB    | 0.088 |
| 6.96E-19 | 0.634846 | 0.76  | 0.733 | 1.39E-15 | endothelial CD320   | 0.027 |
| 8.97E-19 | 0.353944 | 0.74  | 0.61  | 1.79E-15 | endothelial TBCD    | 0.13  |
| 9.55E-19 | 0.296655 | 0.948 | 0.874 | 1.91E-15 | endothelial NME2    | 0.074 |
| 9.96E-19 | 0.341336 | 0.878 | 0.756 | 1.99E-15 | endothelial AP2S1   | 0.122 |
| 2.19E-18 | 0.324695 | 0.757 | 0.636 | 4.39E-15 | endothelial GNG10   | 0.121 |
| 2.26E-18 | 0.278831 | 0.896 | 0.717 | 4.52E-15 | endothelial ETHE1   | 0.179 |
| 2.42E-18 | 0.352396 | 0.747 | 0.613 | 4.85E-15 | endothelial MRPL17  | 0.134 |
| 3.04E-18 | 0.392958 | 0.875 | 0.767 | 6.08E-15 | endothelial GIMAP7  | 0.108 |
| 3.89E-18 | 0.295841 | 0.799 | 0.753 | 7.78E-15 | endothelial YWHAH   | 0.046 |
| 9.04E-18 | 0.371654 | 0.701 | 0.596 | 1.81E-14 | endothelial FEZ2    | 0.105 |
| 9.65E-18 | 0.356931 | 0.976 | 0.866 | 1.93E-14 | endothelial LDHA    | 0.11  |
| 5.97E-17 | 0.372674 | 0.694 | 0.587 | 1.19E-13 | endothelial PAM     | 0.107 |
| 1.73E-16 | 0.356268 | 0.74  | 0.651 | 3.45E-13 | endothelial PRDX4   | 0.089 |
| 2.15E-16 | 0.288422 | 0.663 | 0.509 | 4.29E-13 | endothelial IGFBP2  | 0.154 |
| 3.15E-16 | 0.331194 | 0.951 | 0.87  | 6.30E-13 | endothelial TUBA1A  | 0.081 |
| 6.12E-16 | 0.386315 | 0.778 | 0.711 | 1.22E-12 | endothelial ENTPD1  | 0.067 |
| 1.23E-14 | 0.529302 | 0.632 | 0.465 | 2.46E-11 | endothelial BMPR2   | 0.167 |

|           |          |       |       |           |                      |        |
|-----------|----------|-------|-------|-----------|----------------------|--------|
| 1.24E-14  | 0.346554 | 0.764 | 0.705 | 2.47E-11  | endothelial PARVB    | 0.059  |
| 1.85E-14  | 0.426819 | 0.677 | 0.651 | 3.69E-11  | endothelial APOLD1   | 0.026  |
| 2.43E-14  | 0.268467 | 0.792 | 0.677 | 4.87E-11  | endothelial PDIA4    | 0.115  |
| 6.04E-14  | 0.343831 | 0.854 | 0.765 | 1.21E-10  | endothelial STMN1    | 0.089  |
| 2.65E-13  | 0.485654 | 0.691 | 0.667 | 5.29E-10  | endothelial RIPOR1   | 0.024  |
| 6.43E-13  | 0.341408 | 0.767 | 0.691 | 1.29E-09  | endothelial CRTAP    | 0.076  |
| 7.30E-13  | 0.276485 | 0.917 | 0.843 | 1.46E-09  | endothelial POMP     | 0.074  |
| 1.24E-12  | 0.455972 | 0.705 | 0.705 | 2.49E-09  | endothelial TSPAN3   | 0      |
| 7.37E-12  | 0.451948 | 0.622 | 0.524 | 1.47E-08  | endothelial CRIM1    | 0.098  |
| 9.01E-12  | 0.522426 | 0.691 | 0.733 | 1.80E-08  | endothelial DUSP23   | -0.042 |
| 1.31E-11  | 0.317237 | 0.729 | 0.656 | 2.62E-08  | endothelial NUCB2    | 0.073  |
| 6.02E-11  | 0.313114 | 0.712 | 0.741 | 1.20E-07  | endothelial SGK1     | -0.029 |
| 6.41E-11  | 0.280547 | 0.694 | 0.657 | 1.28E-07  | endothelial PDLIM5   | 0.037  |
| 1.47E-10  | 0.276142 | 0.733 | 0.638 | 2.94E-07  | endothelial SPCS3    | 0.095  |
| 2.45E-10  | 0.372718 | 0.733 | 0.771 | 4.91E-07  | endothelial UPP1     | -0.038 |
| 4.32E-10  | 0.273257 | 0.67  | 0.636 | 8.63E-07  | endothelial CCDC50   | 0.034  |
| 6.66E-10  | 0.344794 | 0.712 | 0.669 | 1.33E-06  | endothelial PLSCR1   | 0.043  |
| 4.29E-09  | 0.384402 | 0.688 | 0.663 | 8.58E-06  | endothelial EIF2AK4  | 0.025  |
| 4.59E-09  | 0.316197 | 0.743 | 0.711 | 9.18E-06  | endothelial YPEL2    | 0.032  |
| 4.87E-09  | 0.272684 | 0.701 | 0.621 | 9.73E-06  | endothelial LPP      | 0.08   |
| 5.89E-07  | 0.320417 | 0.649 | 0.62  | 0.001178  | endothelial RTL8C    | 0.029  |
| 6.33E-07  | 0.310755 | 0.691 | 0.666 | 0.001266  | endothelial KLF9     | 0.025  |
| 6.74E-07  | 0.328302 | 0.705 | 0.675 | 0.001348  | endothelial NCOA7    | 0.03   |
| 9.05E-07  | 0.267989 | 0.635 | 0.637 | 0.001811  | endothelial PTP4A3   | -0.002 |
| 9.69E-07  | 0.294944 | 0.59  | 0.425 | 0.001939  | endothelial F2R      | 0.165  |
| 3.79E-06  | 0.330562 | 0.663 | 0.644 | 0.007572  | endothelial ZEB1     | 0.019  |
| 4.94E-06  | 0.3739   | 0.653 | 0.713 | 0.009871  | endothelial RGS3     | -0.06  |
| 7.29E-06  | 0.295237 | 0.635 | 0.598 | 0.014579  | endothelial LEPROT   | 0.037  |
| 7.40E-06  | 0.383196 | 0.597 | 0.552 | 0.014808  | endothelial TRIM47   | 0.045  |
| 1.42E-05  | 0.313931 | 0.635 | 0.609 | 0.028384  | endothelial RHOC     | 0.026  |
| 2.36E-05  | 0.344997 | 0.615 | 0.531 | 0.047148  | endothelial ATL3     | 0.084  |
| 1.76E-299 | 0.564379 | 0.975 | 0.613 | 3.51E-296 | Fibroblasts FXYD1    | 0.362  |
| 1.62E-290 | 0.439332 | 0.966 | 0.565 | 3.23E-287 | Fibroblasts AC245595 | 0.401  |
| 1.92E-279 | 1.525789 | 0.945 | 0.6   | 3.83E-276 | Fibroblasts MFGE8    | 0.345  |
| 6.25E-274 | 1.440895 | 0.951 | 0.672 | 1.25E-270 | Fibroblasts COL18A1  | 0.279  |
| 4.92E-273 | 1.164509 | 0.972 | 0.753 | 9.83E-270 | Fibroblasts NBL1     | 0.219  |
| 5.96E-271 | 1.951257 | 0.981 | 0.66  | 1.19E-267 | Fibroblasts LGALS1   | 0.321  |
| 1.36E-262 | 1.358077 | 0.929 | 0.681 | 2.71E-259 | Fibroblasts PCOLCE   | 0.248  |
| 6.00E-251 | 1.710251 | 0.977 | 0.752 | 1.20E-247 | Fibroblasts TIMP1    | 0.225  |
| 9.88E-248 | 1.643583 | 0.993 | 0.883 | 1.98E-244 | Fibroblasts IFITM3   | 0.11   |
| 7.08E-241 | 1.345169 | 0.996 | 0.894 | 1.42E-237 | Fibroblasts VIM      | 0.102  |
| 5.41E-240 | 0.985259 | 0.937 | 0.628 | 1.08E-236 | Fibroblasts RAB31    | 0.309  |
| 3.88E-235 | 1.463685 | 0.931 | 0.803 | 7.77E-232 | Fibroblasts COL6A3   | 0.128  |
| 8.28E-228 | 1.699607 | 0.965 | 0.792 | 1.66E-224 | Fibroblasts ID3      | 0.173  |
| 1.81E-225 | 0.764362 | 0.942 | 0.647 | 3.63E-222 | Fibroblasts MCAM     | 0.295  |
| 1.12E-222 | 1.331255 | 0.926 | 0.652 | 2.24E-219 | Fibroblasts LGALS3BI | 0.274  |
| 1.49E-213 | 1.21722  | 0.924 | 0.688 | 2.99E-210 | Fibroblasts TPM1     | 0.236  |
| 1.76E-207 | 1.070961 | 0.887 | 0.596 | 3.52E-204 | Fibroblasts DKK3     | 0.291  |
| 1.12E-206 | 0.465531 | 0.956 | 0.657 | 2.24E-203 | Fibroblasts GLMP     | 0.299  |
| 1.50E-205 | 0.603014 | 0.922 | 0.625 | 3.00E-202 | Fibroblasts ZMIZ1    | 0.297  |
| 1.25E-204 | 1.132512 | 0.949 | 0.728 | 2.51E-201 | Fibroblasts ITGB1    | 0.221  |
| 6.11E-204 | 1.299061 | 0.959 | 0.719 | 1.22E-200 | Fibroblasts CD63     | 0.24   |
| 4.73E-203 | 1.210295 | 0.924 | 0.651 | 9.46E-200 | Fibroblasts SELENOM  | 0.273  |
| 1.42E-202 | 0.501175 | 0.961 | 0.742 | 2.84E-199 | Fibroblasts HEBP1    | 0.219  |
| 5.78E-196 | 0.957942 | 0.907 | 0.641 | 1.16E-192 | Fibroblasts SERPINH1 | 0.266  |
| 7.56E-193 | 0.459673 | 0.956 | 0.721 | 1.51E-189 | Fibroblasts TMEM9    | 0.235  |

|           |          |       |       |           |                     |       |
|-----------|----------|-------|-------|-----------|---------------------|-------|
| 3.42E-192 | 1.235762 | 0.938 | 0.724 | 6.84E-189 | Fibroblasts LAPTM4A | 0.214 |
| 1.73E-191 | 0.918595 | 0.928 | 0.748 | 3.45E-188 | Fibroblasts PDLIM1  | 0.18  |
| 3.36E-190 | 0.991085 | 0.956 | 0.759 | 6.71E-187 | Fibroblasts TSC22D1 | 0.197 |
| 4.69E-189 | 0.730343 | 0.958 | 0.69  | 9.38E-186 | Fibroblasts MT1E    | 0.268 |
| 1.26E-188 | 0.490163 | 0.922 | 0.676 | 2.52E-185 | Fibroblasts LGMN    | 0.246 |
| 1.99E-187 | 0.597545 | 0.954 | 0.722 | 3.98E-184 | Fibroblasts KLF10   | 0.232 |
| 9.49E-183 | 0.39114  | 0.958 | 0.586 | 1.90E-179 | Fibroblasts PGM1    | 0.372 |
| 2.60E-177 | 1.224479 | 0.894 | 0.695 | 5.21E-174 | Fibroblasts SPON2   | 0.199 |
| 7.94E-176 | 0.387636 | 0.882 | 0.613 | 1.59E-172 | Fibroblasts ST3GAL4 | 0.269 |
| 3.60E-175 | 0.87793  | 0.959 | 0.731 | 7.20E-172 | Fibroblasts GLUL    | 0.228 |
| 1.04E-173 | 0.484685 | 0.919 | 0.622 | 2.08E-170 | Fibroblasts SCPEP1  | 0.297 |
| 1.03E-172 | 0.922351 | 0.919 | 0.76  | 2.05E-169 | Fibroblasts PTMS    | 0.159 |
| 2.38E-172 | 0.604998 | 0.907 | 0.591 | 4.75E-169 | Fibroblasts LEPROT  | 0.316 |
| 8.77E-172 | 0.288615 | 0.901 | 0.55  | 1.75E-168 | Fibroblasts STAT2   | 0.351 |
| 2.55E-170 | 0.28164  | 0.931 | 0.682 | 5.10E-167 | Fibroblasts RASD1   | 0.249 |
| 1.84E-168 | 0.929001 | 0.845 | 0.568 | 3.69E-165 | Fibroblasts COL5A1  | 0.277 |
| 7.70E-168 | 0.35885  | 0.949 | 0.687 | 1.54E-164 | Fibroblasts ZBTB16  | 0.262 |
| 2.80E-166 | 0.673147 | 0.933 | 0.735 | 5.59E-163 | Fibroblasts SMIM3   | 0.198 |
| 1.22E-165 | 0.610871 | 0.891 | 0.669 | 2.44E-162 | Fibroblasts TNS3    | 0.222 |
| 8.41E-165 | 1.068246 | 0.933 | 0.769 | 1.68E-161 | Fibroblasts DSTN    | 0.164 |
| 1.56E-164 | 0.304167 | 0.892 | 0.58  | 3.12E-161 | Fibroblasts CYTH3   | 0.312 |
| 2.64E-164 | 1.585245 | 0.864 | 0.544 | 5.27E-161 | Fibroblasts ACTA2   | 0.32  |
| 1.33E-163 | 0.835035 | 0.905 | 0.736 | 2.67E-160 | Fibroblasts APP     | 0.169 |
| 1.36E-163 | 1.001908 | 0.952 | 0.705 | 2.72E-160 | Fibroblasts ANXA5   | 0.247 |
| 1.41E-159 | 0.868896 | 0.889 | 0.636 | 2.81E-156 | Fibroblasts PLPP1   | 0.253 |
| 7.72E-159 | 0.772464 | 0.97  | 0.853 | 1.54E-155 | Fibroblasts LMNA    | 0.117 |
| 8.42E-159 | 0.969008 | 0.887 | 0.725 | 1.68E-155 | Fibroblasts LTBP4   | 0.162 |
| 7.72E-158 | 0.582796 | 0.919 | 0.703 | 1.54E-154 | Fibroblasts SPATS2L | 0.216 |
| 1.92E-156 | 0.917677 | 0.905 | 0.687 | 3.85E-153 | Fibroblasts CRTAP   | 0.218 |
| 2.20E-156 | 0.55073  | 0.951 | 0.723 | 4.40E-153 | Fibroblasts CD9     | 0.228 |
| 2.34E-153 | 0.506894 | 0.896 | 0.642 | 4.68E-150 | Fibroblasts CTSL    | 0.254 |
| 2.09E-152 | 0.812048 | 0.864 | 0.628 | 4.19E-149 | Fibroblasts BEX3    | 0.236 |
| 2.87E-152 | 0.432528 | 0.951 | 0.681 | 5.74E-149 | Fibroblasts COA3    | 0.27  |
| 3.80E-152 | 0.527292 | 0.898 | 0.613 | 7.60E-149 | Fibroblasts VAT1    | 0.285 |
| 7.08E-152 | 0.769093 | 0.885 | 0.628 | 1.42E-148 | Fibroblasts NFIC    | 0.257 |
| 4.98E-150 | 0.514094 | 0.924 | 0.619 | 9.96E-147 | Fibroblasts CTNNA1  | 0.305 |
| 6.83E-150 | 0.784965 | 0.924 | 0.699 | 1.37E-146 | Fibroblasts GRN     | 0.225 |
| 3.55E-149 | 0.722511 | 0.922 | 0.645 | 7.10E-146 | Fibroblasts STOM    | 0.277 |
| 7.13E-147 | 0.300693 | 0.917 | 0.657 | 1.43E-143 | Fibroblasts EIF2AK4 | 0.26  |
| 9.16E-147 | 0.511216 | 0.869 | 0.534 | 1.83E-143 | Fibroblasts RTL8A   | 0.335 |
| 1.81E-145 | 0.272355 | 0.947 | 0.639 | 3.62E-142 | Fibroblasts BCL7C   | 0.308 |
| 1.60E-142 | 0.781504 | 0.97  | 0.854 | 3.20E-139 | Fibroblasts PPIB    | 0.116 |
| 2.63E-141 | 0.534826 | 0.961 | 0.789 | 5.26E-138 | Fibroblasts CD81    | 0.172 |
| 4.34E-141 | 0.424472 | 0.956 | 0.756 | 8.68E-138 | Fibroblasts GADD45G | 0.2   |
| 7.24E-141 | 0.518648 | 0.841 | 0.497 | 1.45E-137 | Fibroblasts FBLN5   | 0.344 |
| 4.54E-135 | 0.512915 | 0.956 | 0.835 | 9.07E-132 | Fibroblasts KLF4    | 0.121 |
| 7.23E-135 | 0.267735 | 0.903 | 0.633 | 1.45E-131 | Fibroblasts GSTM2   | 0.27  |
| 1.18E-132 | 0.647078 | 0.951 | 0.708 | 2.36E-129 | Fibroblasts NPC2    | 0.243 |
| 1.85E-132 | 0.405424 | 0.908 | 0.718 | 3.70E-129 | Fibroblasts SPTSSA  | 0.19  |
| 3.32E-132 | 0.743937 | 0.947 | 0.782 | 6.65E-129 | Fibroblasts TPM4    | 0.165 |
| 1.05E-131 | 0.309523 | 0.852 | 0.575 | 2.10E-128 | Fibroblasts GPX7    | 0.277 |
| 3.10E-126 | 0.421675 | 0.896 | 0.681 | 6.21E-123 | Fibroblasts TCEAL8  | 0.215 |
| 1.52E-125 | 1.354327 | 0.965 | 0.776 | 3.04E-122 | Fibroblasts MT2A    | 0.189 |
| 3.70E-124 | 0.274179 | 0.944 | 0.67  | 7.39E-121 | Fibroblasts ALG5    | 0.274 |
| 6.42E-124 | 0.362821 | 0.912 | 0.614 | 1.28E-120 | Fibroblasts SIGMAR1 | 0.298 |
| 1.37E-123 | 0.456661 | 0.869 | 0.661 | 2.73E-120 | Fibroblasts KLF9    | 0.208 |



|           |          |       |       |           |                        |       |
|-----------|----------|-------|-------|-----------|------------------------|-------|
| 1.84E-123 | 0.713311 | 0.954 | 0.799 | 3.68E-120 | Fibroblasts PSAP       | 0.155 |
| 6.98E-123 | 0.848716 | 0.908 | 0.72  | 1.40E-119 | Fibroblasts FLNA       | 0.188 |
| 2.58E-122 | 0.313159 | 0.912 | 0.722 | 5.16E-119 | Fibroblasts PMEPA1     | 0.19  |
| 2.94E-122 | 0.834413 | 0.938 | 0.756 | 5.89E-119 | Fibroblasts ANXA2      | 0.182 |
| 2.12E-120 | 0.610363 | 0.82  | 0.583 | 4.25E-117 | Fibroblasts PAM        | 0.237 |
| 4.11E-118 | 0.551937 | 0.831 | 0.634 | 8.22E-115 | Fibroblasts VCL        | 0.197 |
| 6.75E-118 | 0.561527 | 0.966 | 0.769 | 1.35E-114 | Fibroblasts MT1X       | 0.197 |
| 7.88E-118 | 0.322526 | 0.959 | 0.711 | 1.58E-114 | Fibroblasts MRPL36     | 0.248 |
| 9.40E-118 | 0.549676 | 0.848 | 0.649 | 1.88E-114 | Fibroblasts TMEM204    | 0.199 |
| 1.62E-117 | 0.356656 | 0.921 | 0.664 | 3.24E-114 | Fibroblasts PRCP       | 0.257 |
| 2.59E-116 | 0.72794  | 0.958 | 0.835 | 5.18E-113 | Fibroblasts CEBPD      | 0.123 |
| 7.43E-116 | 0.721336 | 0.843 | 0.711 | 1.49E-112 | Fibroblasts ACTN1      | 0.132 |
| 7.93E-116 | 0.632529 | 0.963 | 0.868 | 1.59E-112 | Fibroblasts RAC1       | 0.095 |
| 7.37E-114 | 0.576671 | 0.834 | 0.681 | 1.47E-110 | Fibroblasts PKIG       | 0.153 |
| 8.29E-114 | 0.656745 | 0.831 | 0.616 | 1.66E-110 | Fibroblasts RTL8C      | 0.215 |
| 1.37E-113 | 0.314758 | 0.887 | 0.661 | 2.74E-110 | Fibroblasts HYI        | 0.226 |
| 2.09E-112 | 0.381454 | 0.942 | 0.647 | 4.19E-109 | Fibroblasts AKR1B1     | 0.295 |
| 4.01E-112 | 0.50712  | 0.998 | 0.991 | 8.01E-109 | Fibroblasts FTH1       | 0.007 |
| 2.18E-111 | 0.617542 | 0.917 | 0.73  | 4.36E-108 | Fibroblasts HDLBP      | 0.187 |
| 2.12E-109 | 0.54436  | 0.834 | 0.652 | 4.25E-106 | Fibroblasts TCF4       | 0.182 |
| 2.42E-109 | 0.462711 | 0.869 | 0.627 | 4.83E-106 | Fibroblasts OTULINL    | 0.242 |
| 6.99E-109 | 0.629839 | 0.892 | 0.808 | 1.40E-105 | Fibroblasts CD151      | 0.084 |
| 9.65E-108 | 0.363731 | 0.91  | 0.666 | 1.93E-104 | Fibroblasts LMO4       | 0.244 |
| 7.90E-107 | 0.504817 | 0.91  | 0.687 | 1.58E-103 | Fibroblasts MAGED2     | 0.223 |
| 1.15E-106 | 0.49261  | 0.84  | 0.707 | 2.29E-103 | Fibroblasts CHPF       | 0.133 |
| 4.15E-106 | 0.464897 | 0.949 | 0.716 | 8.30E-103 | Fibroblasts TM9SF2     | 0.233 |
| 1.38E-105 | 0.468382 | 0.857 | 0.642 | 2.76E-102 | Fibroblasts IKBIP      | 0.215 |
| 3.39E-105 | 0.711587 | 0.915 | 0.797 | 6.78E-102 | Fibroblasts P4HB       | 0.118 |
| 8.86E-103 | 0.720746 | 0.966 | 0.811 | 1.77E-99  | Fibroblasts SELENOW    | 0.155 |
| 3.16E-101 | 0.733641 | 0.857 | 0.684 | 6.32E-98  | Fibroblasts CSRP1      | 0.173 |
| 2.00E-99  | 0.73382  | 0.824 | 0.718 | 3.99E-96  | Fibroblasts GEM        | 0.106 |
| 6.64E-99  | 0.337623 | 0.924 | 0.675 | 1.33E-95  | Fibroblasts C20orf27   | 0.249 |
| 9.51E-97  | 0.422237 | 0.882 | 0.774 | 1.90E-93  | Fibroblasts RRBP1      | 0.108 |
| 5.69E-95  | 0.476182 | 0.794 | 0.54  | 1.14E-91  | Fibroblasts ISYNA1     | 0.254 |
| 2.24E-94  | 0.576447 | 0.806 | 0.666 | 4.48E-91  | Fibroblasts PDLIM7     | 0.14  |
| 2.51E-94  | 0.294794 | 0.974 | 0.757 | 5.01E-91  | Fibroblasts MRPL51     | 0.217 |
| 8.49E-93  | 0.36563  | 0.882 | 0.677 | 1.70E-89  | Fibroblasts FOXO3      | 0.205 |
| 2.99E-92  | 0.689755 | 0.792 | 0.622 | 5.98E-89  | Fibroblasts CALU       | 0.17  |
| 2.27E-91  | 0.507583 | 0.979 | 0.807 | 4.53E-88  | Fibroblasts EIF5A      | 0.172 |
| 1.46E-89  | 0.592974 | 0.952 | 0.759 | 2.93E-86  | Fibroblasts SOCS3      | 0.193 |
| 4.71E-89  | 0.34696  | 0.855 | 0.627 | 9.42E-86  | Fibroblasts SLC39A7    | 0.228 |
| 1.60E-88  | 0.394183 | 0.961 | 0.835 | 3.20E-85  | Fibroblasts FABP5      | 0.126 |
| 3.04E-86  | 0.421567 | 0.938 | 0.771 | 6.09E-83  | Fibroblasts MIR4435-20 | 0.167 |
| 3.78E-86  | 0.437432 | 0.864 | 0.75  | 7.56E-83  | Fibroblasts FCGRT      | 0.114 |
| 3.95E-86  | 0.593913 | 0.827 | 0.702 | 7.91E-83  | Fibroblasts TSPAN3     | 0.125 |
| 9.20E-86  | 0.680537 | 0.954 | 0.846 | 1.84E-82  | Fibroblasts TUBB       | 0.108 |
| 9.48E-86  | 0.411552 | 0.877 | 0.615 | 1.90E-82  | Fibroblasts CRELD2     | 0.262 |
| 1.96E-83  | 0.534109 | 0.875 | 0.658 | 3.91E-80  | Fibroblasts ITM2C      | 0.217 |
| 1.64E-81  | 0.464986 | 0.857 | 0.678 | 3.28E-78  | Fibroblasts PLD3       | 0.179 |
| 2.81E-81  | 0.493247 | 0.79  | 0.657 | 5.62E-78  | Fibroblasts SCARB2     | 0.133 |
| 2.57E-80  | 0.286648 | 0.956 | 0.847 | 5.13E-77  | Fibroblasts HSPB1      | 0.109 |
| 4.39E-80  | 0.490887 | 0.929 | 0.788 | 8.77E-77  | Fibroblasts HSP90B1    | 0.141 |
| 9.44E-80  | 0.478987 | 0.762 | 0.611 | 1.89E-76  | Fibroblasts SGCB       | 0.151 |
| 1.55E-79  | 0.538205 | 0.841 | 0.699 | 3.11E-76  | Fibroblasts MAP1LC3.0  | 0.142 |
| 1.62E-79  | 0.439591 | 0.84  | 0.706 | 3.24E-76  | Fibroblasts TNFRSF1A   | 0.134 |
| 3.54E-79  | 0.471769 | 0.854 | 0.632 | 7.09E-76  | Fibroblasts PTP4A3     | 0.222 |

|          |          |       |       |          |                     |       |
|----------|----------|-------|-------|----------|---------------------|-------|
| 8.87E-79 | 0.427023 | 0.94  | 0.716 | 1.77E-75 | Fibroblasts PRNP    | 0.224 |
| 2.07E-75 | 0.414118 | 0.898 | 0.737 | 4.15E-72 | Fibroblasts HSBP1   | 0.161 |
| 2.32E-75 | 0.450721 | 0.758 | 0.578 | 4.65E-72 | Fibroblasts P3H1    | 0.18  |
| 5.95E-75 | 0.412765 | 0.824 | 0.654 | 1.19E-71 | Fibroblasts PDLIM5  | 0.17  |
| 7.42E-75 | 0.393256 | 0.998 | 0.974 | 1.48E-71 | Fibroblasts FTL     | 0.024 |
| 2.52E-74 | 0.536545 | 0.959 | 0.802 | 5.04E-71 | Fibroblasts PKM     | 0.157 |
| 3.05E-74 | 0.520393 | 0.891 | 0.752 | 6.11E-71 | Fibroblasts KDELR2  | 0.139 |
| 3.95E-74 | 0.441474 | 0.878 | 0.733 | 7.91E-71 | Fibroblasts IL6ST   | 0.145 |
| 8.22E-74 | 0.437621 | 0.926 | 0.771 | 1.64E-70 | Fibroblasts COMT    | 0.155 |
| 3.57E-73 | 0.322844 | 0.808 | 0.632 | 7.14E-70 | Fibroblasts CSF1    | 0.176 |
| 1.15E-71 | 0.366444 | 0.88  | 0.814 | 2.31E-68 | Fibroblasts ID1     | 0.066 |
| 1.96E-71 | 0.329619 | 0.817 | 0.671 | 3.91E-68 | Fibroblasts FNDC3B  | 0.146 |
| 3.86E-70 | 0.493813 | 0.905 | 0.692 | 7.72E-67 | Fibroblasts RPN2    | 0.213 |
| 2.88E-69 | 0.58135  | 0.854 | 0.683 | 5.76E-66 | Fibroblasts AHNAK   | 0.171 |
| 7.74E-68 | 0.447199 | 0.91  | 0.769 | 1.55E-64 | Fibroblasts MYDGF   | 0.141 |
| 2.69E-66 | 0.435655 | 0.788 | 0.688 | 5.37E-63 | Fibroblasts PHACTR2 | 0.1   |
| 3.50E-66 | 0.349629 | 0.905 | 0.724 | 7.01E-63 | Fibroblasts ADI1    | 0.181 |
| 3.58E-66 | 0.301501 | 0.85  | 0.582 | 7.16E-63 | Fibroblasts ZEB2    | 0.268 |
| 2.28E-65 | 0.380462 | 0.908 | 0.689 | 4.57E-62 | Fibroblasts CNIH1   | 0.219 |
| 6.26E-65 | 0.48684  | 0.869 | 0.672 | 1.25E-61 | Fibroblasts HEXB    | 0.197 |
| 1.24E-64 | 0.436388 | 0.818 | 0.7   | 2.49E-61 | Fibroblasts SPTBN1  | 0.118 |
| 2.75E-64 | 0.619679 | 0.989 | 0.926 | 5.51E-61 | Fibroblasts ZFP36L1 | 0.063 |
| 1.12E-63 | 0.355979 | 0.797 | 0.661 | 2.24E-60 | Fibroblasts FUCA2   | 0.136 |
| 1.17E-63 | 0.319095 | 0.917 | 0.705 | 2.34E-60 | Fibroblasts FKBP2   | 0.212 |
| 3.09E-62 | 0.602118 | 0.972 | 0.918 | 6.19E-59 | Fibroblasts EGR1    | 0.054 |
| 5.44E-62 | 0.442706 | 0.908 | 0.705 | 1.09E-58 | Fibroblasts SSR3    | 0.203 |
| 6.88E-62 | 0.494197 | 0.859 | 0.736 | 1.38E-58 | Fibroblasts CANX    | 0.123 |
| 7.29E-62 | 0.437032 | 0.792 | 0.731 | 1.46E-58 | Fibroblasts TCEAL4  | 0.061 |
| 1.31E-61 | 0.361871 | 0.764 | 0.612 | 2.62E-58 | Fibroblasts MAGED1  | 0.152 |
| 1.17E-60 | 0.538298 | 0.97  | 0.869 | 2.34E-57 | Fibroblasts TUBA1A  | 0.101 |
| 3.47E-59 | 0.326436 | 0.977 | 0.904 | 6.95E-56 | Fibroblasts S100A11 | 0.073 |
| 4.58E-59 | 0.575897 | 0.984 | 0.901 | 9.17E-56 | Fibroblasts GADD45B | 0.083 |
| 1.72E-58 | 0.386025 | 0.832 | 0.61  | 3.44E-55 | Fibroblasts TYMP    | 0.222 |
| 4.27E-57 | 0.416639 | 0.875 | 0.751 | 8.54E-54 | Fibroblasts YWHAH   | 0.124 |
| 5.87E-57 | 0.277868 | 0.979 | 0.804 | 1.17E-53 | Fibroblasts NUCKS1  | 0.175 |
| 1.01E-56 | 0.284578 | 0.877 | 0.666 | 2.03E-53 | Fibroblasts VAMP5   | 0.211 |
| 1.09E-55 | 0.408436 | 0.982 | 0.841 | 2.18E-52 | Fibroblasts SEC61B  | 0.141 |
| 5.32E-55 | 0.523308 | 0.785 | 0.698 | 1.06E-51 | Fibroblasts PTTG1IP | 0.087 |
| 7.36E-55 | 0.302448 | 0.855 | 0.694 | 1.47E-51 | Fibroblasts UGCG    | 0.161 |
| 1.91E-54 | 0.42381  | 0.841 | 0.725 | 3.82E-51 | Fibroblasts CTSB    | 0.116 |
| 7.39E-54 | 0.263169 | 0.764 | 0.591 | 1.48E-50 | Fibroblasts MAGEF1  | 0.173 |
| 1.10E-53 | 0.512858 | 0.743 | 0.604 | 2.20E-50 | Fibroblasts WARS    | 0.139 |
| 1.50E-53 | 0.488113 | 0.794 | 0.659 | 3.01E-50 | Fibroblasts ERLEC1  | 0.135 |
| 3.97E-53 | 0.455359 | 0.937 | 0.813 | 7.94E-50 | Fibroblasts PRDX1   | 0.124 |
| 1.88E-52 | 0.424582 | 0.774 | 0.65  | 3.77E-49 | Fibroblasts PRDX4   | 0.124 |
| 2.65E-52 | 0.369287 | 0.914 | 0.755 | 5.29E-49 | Fibroblasts EMP3    | 0.159 |
| 9.50E-52 | 0.40635  | 0.901 | 0.73  | 1.90E-48 | Fibroblasts DUT     | 0.171 |
| 1.14E-51 | 0.424675 | 0.951 | 0.855 | 2.28E-48 | Fibroblasts RHOB    | 0.096 |
| 1.31E-51 | 0.307558 | 0.753 | 0.657 | 2.62E-48 | Fibroblasts ENG     | 0.096 |
| 1.88E-50 | 0.277286 | 0.78  | 0.593 | 3.77E-47 | Fibroblasts FEZ2    | 0.187 |
| 2.03E-50 | 0.359303 | 0.799 | 0.61  | 4.06E-47 | Fibroblasts CCPG1   | 0.189 |
| 3.96E-50 | 0.458552 | 0.854 | 0.772 | 7.91E-47 | Fibroblasts PHLDA1  | 0.082 |
| 4.72E-50 | 0.405809 | 0.792 | 0.704 | 9.44E-47 | Fibroblasts NORAD   | 0.088 |
| 8.27E-50 | 0.3491   | 0.732 | 0.563 | 1.65E-46 | Fibroblasts CPQ     | 0.169 |
| 1.98E-49 | 0.367732 | 0.982 | 0.838 | 3.96E-46 | Fibroblasts CSTB    | 0.144 |
| 5.04E-49 | 0.50205  | 0.85  | 0.735 | 1.01E-45 | Fibroblasts CTSC    | 0.115 |

|          |          |       |       |          |                       |       |
|----------|----------|-------|-------|----------|-----------------------|-------|
| 2.21E-48 | 0.355178 | 0.781 | 0.668 | 4.42E-45 | Fibroblasts QSOX1     | 0.113 |
| 6.10E-48 | 0.409563 | 0.995 | 0.903 | 1.22E-44 | Fibroblasts IFITM1    | 0.092 |
| 1.03E-47 | 0.404549 | 0.887 | 0.806 | 2.06E-44 | Fibroblasts CLTA      | 0.081 |
| 1.91E-47 | 0.409607 | 0.78  | 0.694 | 3.82E-44 | Fibroblasts NME4      | 0.086 |
| 1.34E-46 | 0.284141 | 0.831 | 0.687 | 2.67E-43 | Fibroblasts AGTRAP    | 0.144 |
| 2.29E-46 | 0.296885 | 0.772 | 0.634 | 4.58E-43 | Fibroblasts GNG10     | 0.138 |
| 4.21E-46 | 0.308344 | 0.744 | 0.644 | 8.42E-43 | Fibroblasts FHL3      | 0.1   |
| 5.77E-45 | 0.402179 | 0.908 | 0.76  | 1.15E-41 | Fibroblasts PGAM1     | 0.148 |
| 9.92E-44 | 0.322049 | 0.942 | 0.843 | 1.98E-40 | Fibroblasts MYADM     | 0.099 |
| 1.82E-43 | 0.345328 | 0.815 | 0.658 | 3.63E-40 | Fibroblasts CTNNB1    | 0.157 |
| 1.26E-42 | 0.366907 | 0.802 | 0.676 | 2.52E-39 | Fibroblasts CTSA      | 0.126 |
| 1.52E-41 | 0.344388 | 0.877 | 0.794 | 3.05E-38 | Fibroblasts IER3      | 0.083 |
| 2.91E-41 | 0.358938 | 0.836 | 0.697 | 5.82E-38 | Fibroblasts IMPDH2    | 0.139 |
| 1.17E-40 | 0.392452 | 0.771 | 0.674 | 2.33E-37 | Fibroblasts REXO2     | 0.097 |
| 3.88E-40 | 0.367394 | 0.827 | 0.719 | 7.75E-37 | Fibroblasts PDIA6     | 0.108 |
| 9.82E-40 | 0.264474 | 0.924 | 0.836 | 1.96E-36 | Fibroblasts LGALS3    | 0.088 |
| 1.91E-39 | 0.350285 | 0.924 | 0.776 | 3.82E-36 | Fibroblasts FKBP1A    | 0.148 |
| 2.26E-39 | 0.362215 | 0.753 | 0.554 | 4.52E-36 | Fibroblasts IFI6      | 0.199 |
| 4.58E-39 | 0.389746 | 0.908 | 0.795 | 9.15E-36 | Fibroblasts SOD2      | 0.113 |
| 1.39E-38 | 0.273448 | 0.965 | 0.784 | 2.79E-35 | Fibroblasts ARPC5     | 0.181 |
| 2.35E-38 | 0.399971 | 0.947 | 0.904 | 4.69E-35 | Fibroblasts TUBA1B    | 0.043 |
| 5.09E-37 | 0.39123  | 0.698 | 0.557 | 1.02E-33 | Fibroblasts ITGA1     | 0.141 |
| 9.94E-37 | 0.284202 | 0.817 | 0.763 | 1.99E-33 | Fibroblasts ETS2      | 0.054 |
| 2.47E-36 | 0.336278 | 0.958 | 0.873 | 4.94E-33 | Fibroblasts NME2      | 0.085 |
| 1.33E-35 | 0.374915 | 0.728 | 0.671 | 2.65E-32 | Fibroblasts WASL      | 0.057 |
| 6.91E-34 | 0.575209 | 0.991 | 0.978 | 1.38E-30 | Fibroblasts FOS       | 0.013 |
| 2.06E-33 | 0.267812 | 0.82  | 0.684 | 4.12E-30 | Fibroblasts SELENOS   | 0.136 |
| 2.58E-33 | 0.323306 | 0.843 | 0.707 | 5.16E-30 | Fibroblasts UQCRC1    | 0.136 |
| 6.68E-33 | 0.270568 | 0.97  | 0.856 | 1.34E-29 | Fibroblasts HMGN2     | 0.114 |
| 1.13E-32 | 0.296103 | 0.861 | 0.724 | 2.25E-29 | Fibroblasts PHPT1     | 0.137 |
| 1.98E-32 | 0.365341 | 0.728 | 0.62  | 3.95E-29 | Fibroblasts LPP       | 0.108 |
| 1.24E-31 | 0.293339 | 0.975 | 0.873 | 2.47E-28 | Fibroblasts HSPA1A    | 0.102 |
| 1.40E-30 | 0.339452 | 0.776 | 0.764 | 2.81E-27 | Fibroblasts EPS8      | 0.012 |
| 2.89E-30 | 0.273084 | 0.753 | 0.591 | 5.78E-27 | Fibroblasts GSTO1     | 0.162 |
| 8.12E-30 | 0.305007 | 0.67  | 0.518 | 1.62E-26 | Fibroblasts LMCD1     | 0.152 |
| 8.34E-30 | 0.354098 | 0.949 | 0.866 | 1.67E-26 | Fibroblasts ZFAND5    | 0.083 |
| 1.60E-29 | 0.354799 | 0.774 | 0.673 | 3.19E-26 | Fibroblasts SSRP1     | 0.101 |
| 4.98E-29 | 0.370344 | 0.795 | 0.747 | 9.97E-26 | Fibroblasts ICAM1     | 0.048 |
| 5.02E-28 | 0.279371 | 0.698 | 0.624 | 1.00E-24 | Fibroblasts TCEAL3    | 0.074 |
| 6.47E-28 | 0.265673 | 0.848 | 0.759 | 1.29E-24 | Fibroblasts OSTC      | 0.089 |
| 2.26E-27 | 0.341357 | 0.78  | 0.686 | 4.52E-24 | Fibroblasts TMED3     | 0.094 |
| 3.59E-26 | 0.294465 | 0.746 | 0.62  | 7.18E-23 | Fibroblasts LMAN1     | 0.126 |
| 2.82E-25 | 0.281514 | 0.928 | 0.842 | 5.64E-22 | Fibroblasts POMP      | 0.086 |
| 8.20E-24 | 0.327392 | 0.637 | 0.422 | 1.64E-20 | Fibroblasts F2R       | 0.215 |
| 7.44E-23 | 0.320234 | 0.709 | 0.642 | 1.49E-19 | Fibroblasts ZEB1      | 0.067 |
| 3.86E-22 | 0.376493 | 0.693 | 0.607 | 7.72E-19 | Fibroblasts APLP2     | 0.086 |
| 1.71E-21 | 0.276205 | 0.698 | 0.681 | 3.41E-18 | Fibroblasts TNFRSF120 | 0.017 |
| 1.17E-20 | 0.278563 | 0.704 | 0.655 | 2.34E-17 | Fibroblasts ECE1      | 0.049 |
| 4.00E-10 | 0.263371 | 0.905 | 0.858 | 7.99E-07 | Fibroblasts CDKN1A    | 0.047 |
| 1.64E-70 | 0.824398 | 0.975 | 0.759 | 3.29E-67 | Mast cells AF213884   | 0.216 |
| 7.60E-63 | 0.681469 | 0.975 | 0.612 | 1.52E-59 | Mast cells SLC44A1    | 0.363 |
| 1.88E-62 | 0.630018 | 0.967 | 0.638 | 3.77E-59 | Mast cells GSTM2      | 0.329 |
| 3.71E-61 | 0.267094 | 0.984 | 0.643 | 7.42E-58 | Mast cells UBAC1      | 0.341 |
| 3.09E-60 | 1.358892 | 0.926 | 0.5   | 6.19E-57 | Mast cells LTC4S      | 0.426 |
| 4.38E-59 | 1.447693 | 0.967 | 0.735 | 8.76E-56 | Mast cells GLUL       | 0.232 |
| 1.74E-58 | 0.426635 | 0.959 | 0.598 | 3.47E-55 | Mast cells WDFY1      | 0.361 |

|          |          |       |       |          |            |          |       |
|----------|----------|-------|-------|----------|------------|----------|-------|
| 3.55E-58 | 1.820988 | 0.943 | 0.715 | 7.10E-55 | Mast cells | HPGD     | 0.228 |
| 9.36E-58 | 0.941807 | 0.992 | 0.837 | 1.87E-54 | Mast cells | NFKB1    | 0.155 |
| 1.13E-57 | 0.716666 | 0.975 | 0.691 | 2.26E-54 | Mast cells | RIN3     | 0.284 |
| 2.52E-57 | 0.319924 | 0.984 | 0.658 | 5.05E-54 | Mast cells | MTHFD1   | 0.326 |
| 4.38E-57 | 0.420956 | 0.967 | 0.653 | 8.76E-54 | Mast cells | SIAH1    | 0.314 |
| 1.42E-56 | 1.260488 | 1     | 0.842 | 2.83E-53 | Mast cells | NFKBIZ   | 0.158 |
| 1.10E-55 | 0.328031 | 0.984 | 0.684 | 2.19E-52 | Mast cells | TCEAL8   | 0.3   |
| 3.16E-55 | 0.314347 | 0.967 | 0.737 | 6.32E-52 | Mast cells | RRP12    | 0.23  |
| 7.11E-54 | 0.538335 | 0.992 | 0.705 | 1.42E-50 | Mast cells | DUSP10   | 0.287 |
| 7.89E-54 | 0.316865 | 0.959 | 0.63  | 1.58E-50 | Mast cells | WDR77    | 0.329 |
| 2.82E-53 | 0.297682 | 0.951 | 0.58  | 5.64E-50 | Mast cells | DSE      | 0.371 |
| 3.94E-53 | 1.13423  | 1     | 0.756 | 7.88E-50 | Mast cells | TIMP1    | 0.244 |
| 7.81E-53 | 0.859956 | 0.992 | 0.74  | 1.56E-49 | Mast cells | NR4A3    | 0.252 |
| 1.18E-52 | 1.681854 | 0.975 | 0.871 | 2.35E-49 | Mast cells | AREG     | 0.104 |
| 1.49E-52 | 0.277481 | 0.943 | 0.634 | 2.99E-49 | Mast cells | TRERF1   | 0.309 |
| 3.98E-52 | 0.664059 | 0.934 | 0.665 | 7.97E-49 | Mast cells | ADRB2    | 0.269 |
| 8.21E-52 | 0.966674 | 0.951 | 0.678 | 1.64E-48 | Mast cells | TYROBP   | 0.273 |
| 1.30E-51 | 0.832992 | 1     | 0.991 | 2.61E-48 | Mast cells | FTH1     | 0.009 |
| 2.85E-50 | 0.566781 | 0.959 | 0.626 | 5.71E-47 | Mast cells | PCNX4    | 0.333 |
| 3.85E-50 | 1.169009 | 0.885 | 0.504 | 7.70E-47 | Mast cells | VWA5A    | 0.381 |
| 5.30E-50 | 0.414443 | 0.975 | 0.67  | 1.06E-46 | Mast cells | ZDHHC12  | 0.305 |
| 7.52E-50 | 0.584265 | 0.943 | 0.638 | 1.50E-46 | Mast cells | GNA15    | 0.305 |
| 3.07E-49 | 0.623543 | 0.984 | 0.739 | 6.14E-46 | Mast cells | IL4R     | 0.245 |
| 3.66E-49 | 0.410911 | 0.975 | 0.63  | 7.31E-46 | Mast cells | STX11    | 0.345 |
| 4.57E-48 | 0.957971 | 0.926 | 0.64  | 9.14E-45 | Mast cells | RNF130   | 0.286 |
| 1.17E-47 | 1.132261 | 0.91  | 0.667 | 2.34E-44 | Mast cells | FCER1G   | 0.243 |
| 1.41E-47 | 0.380656 | 0.943 | 0.581 | 2.82E-44 | Mast cells | RASSF2   | 0.362 |
| 1.77E-47 | 0.695155 | 0.959 | 0.747 | 3.55E-44 | Mast cells | ICAM1    | 0.212 |
| 2.51E-46 | 0.35595  | 0.951 | 0.699 | 5.03E-43 | Mast cells | 3-Mar    | 0.252 |
| 2.77E-46 | 0.793614 | 0.951 | 0.671 | 5.54E-43 | Mast cells | LMO4     | 0.28  |
| 1.13E-45 | 0.515267 | 0.984 | 0.763 | 2.26E-42 | Mast cells | BCL3     | 0.221 |
| 1.45E-45 | 1.032047 | 0.992 | 0.896 | 2.90E-42 | Mast cells | VIM      | 0.096 |
| 1.64E-45 | 0.85342  | 0.951 | 0.738 | 3.28E-42 | Mast cells | SMIM3    | 0.213 |
| 1.94E-45 | 0.971102 | 0.992 | 0.855 | 3.88E-42 | Mast cells | LMNA     | 0.137 |
| 3.88E-45 | 0.266566 | 0.959 | 0.707 | 7.76E-42 | Mast cells | SPATS2L  | 0.252 |
| 7.60E-45 | 0.590154 | 0.975 | 0.662 | 1.52E-41 | Mast cells | ANKRD28  | 0.313 |
| 1.49E-44 | 0.902681 | 0.926 | 0.694 | 2.98E-41 | Mast cells | TENT5A   | 0.232 |
| 5.75E-44 | 0.593495 | 0.934 | 0.654 | 1.15E-40 | Mast cells | IL18R1   | 0.28  |
| 1.15E-43 | 0.851963 | 0.984 | 0.818 | 2.31E-40 | Mast cells | AC020916 | 0.166 |
| 1.31E-43 | 0.482096 | 0.926 | 0.683 | 2.62E-40 | Mast cells | TSC22D2  | 0.243 |
| 7.65E-43 | 0.437681 | 0.918 | 0.643 | 1.53E-39 | Mast cells | SPTLC2   | 0.275 |
| 9.01E-43 | 0.513425 | 0.893 | 0.535 | 1.80E-39 | Mast cells | AC084033 | 0.358 |
| 5.99E-42 | 1.008222 | 0.992 | 0.844 | 1.20E-38 | Mast cells | MYADM    | 0.148 |
| 2.28E-41 | 1.01921  | 0.943 | 0.724 | 4.55E-38 | Mast cells | CD63     | 0.219 |
| 3.85E-41 | 0.451785 | 0.975 | 0.703 | 7.71E-38 | Mast cells | TIPARP   | 0.272 |
| 9.00E-41 | 0.313577 | 0.984 | 0.738 | 1.80E-37 | Mast cells | SHMT2    | 0.246 |
| 9.55E-41 | 0.862032 | 0.918 | 0.657 | 1.91E-37 | Mast cells | ARHGAP1  | 0.261 |
| 1.46E-40 | 0.757069 | 0.902 | 0.618 | 2.92E-37 | Mast cells | VAT1     | 0.284 |
| 1.83E-40 | 0.519818 | 0.885 | 0.631 | 3.66E-37 | Mast cells | GNS      | 0.254 |
| 2.84E-40 | 0.767768 | 0.959 | 0.737 | 5.69E-37 | Mast cells | GPR65    | 0.222 |
| 3.90E-40 | 0.661498 | 0.902 | 0.63  | 7.81E-37 | Mast cells | BEX4     | 0.272 |
| 2.37E-39 | 0.829619 | 0.934 | 0.728 | 4.75E-36 | Mast cells | CAPG     | 0.206 |
| 3.18E-39 | 0.929666 | 0.885 | 0.635 | 6.37E-36 | Mast cells | CSF1     | 0.25  |
| 3.38E-39 | 0.789462 | 0.902 | 0.728 | 6.76E-36 | Mast cells | CD9      | 0.174 |
| 6.11E-39 | 1.095563 | 0.984 | 0.854 | 1.22E-35 | Mast cells | SOCS1    | 0.13  |
| 6.42E-39 | 0.645459 | 0.984 | 0.757 | 1.28E-35 | Mast cells | MRPS6    | 0.227 |

|          |          |       |       |          |            |          |       |
|----------|----------|-------|-------|----------|------------|----------|-------|
| 1.80E-38 | 0.49262  | 0.943 | 0.629 | 3.61E-35 | Mast cells | ARMCX3   | 0.314 |
| 1.87E-38 | 0.31542  | 0.951 | 0.688 | 3.74E-35 | Mast cells | BCL2L1   | 0.263 |
| 3.24E-38 | 0.273641 | 0.975 | 0.717 | 6.49E-35 | Mast cells | CDK4     | 0.258 |
| 5.54E-38 | 0.89504  | 0.951 | 0.724 | 1.11E-34 | Mast cells | ALOX5AP  | 0.227 |
| 8.26E-38 | 0.940644 | 0.877 | 0.713 | 1.65E-34 | Mast cells | BACE2    | 0.164 |
| 5.72E-37 | 0.337277 | 0.967 | 0.587 | 1.14E-33 | Mast cells | RFTN1    | 0.38  |
| 5.94E-37 | 0.780456 | 0.951 | 0.712 | 1.19E-33 | Mast cells | NPC2     | 0.239 |
| 7.99E-37 | 0.634783 | 0.959 | 0.704 | 1.60E-33 | Mast cells | BHLHE40  | 0.255 |
| 8.66E-37 | 0.884379 | 0.992 | 0.919 | 1.73E-33 | Mast cells | EGR1     | 0.073 |
| 8.79E-37 | 0.957017 | 1     | 0.978 | 1.76E-33 | Mast cells | FOS      | 0.022 |
| 2.65E-36 | 0.279125 | 0.984 | 0.778 | 5.30E-33 | Mast cells | DNAJB9   | 0.206 |
| 9.04E-36 | 0.523552 | 0.934 | 0.617 | 1.81E-32 | Mast cells | ELMO1    | 0.317 |
| 4.29E-35 | 0.609861 | 0.926 | 0.703 | 8.57E-32 | Mast cells | AP1S2    | 0.223 |
| 5.39E-35 | 0.377504 | 0.844 | 0.553 | 1.08E-31 | Mast cells | STAP1    | 0.291 |
| 7.94E-35 | 0.286784 | 0.967 | 0.655 | 1.59E-31 | Mast cells | NUCB2    | 0.312 |
| 4.08E-34 | 0.831599 | 0.951 | 0.767 | 8.16E-31 | Mast cells | ANXA1    | 0.184 |
| 5.30E-34 | 0.369766 | 0.975 | 0.702 | 1.06E-30 | Mast cells | MLEC     | 0.273 |
| 1.28E-33 | 0.895723 | 1     | 0.953 | 2.55E-30 | Mast cells | FOSB     | 0.047 |
| 2.03E-33 | 0.761584 | 0.91  | 0.654 | 4.07E-30 | Mast cells | CD82     | 0.256 |
| 3.55E-33 | 0.747742 | 0.992 | 0.816 | 7.11E-30 | Mast cells | ANKRD37  | 0.176 |
| 6.02E-33 | 0.708423 | 0.984 | 0.848 | 1.20E-29 | Mast cells | TSPYL2   | 0.136 |
| 8.64E-33 | 0.451845 | 1     | 0.995 | 1.73E-29 | Mast cells | MALAT1   | 0.005 |
| 8.69E-33 | 0.583135 | 0.967 | 0.658 | 1.74E-29 | Mast cells | HIF1A    | 0.309 |
| 1.03E-32 | 0.283618 | 0.951 | 0.653 | 2.06E-29 | Mast cells | HTATIP2  | 0.298 |
| 1.22E-32 | 0.37641  | 0.967 | 0.837 | 2.45E-29 | Mast cells | KLF4     | 0.13  |
| 1.70E-32 | 0.805137 | 0.918 | 0.76  | 3.40E-29 | Mast cells | ZC3H12A  | 0.158 |
| 1.74E-32 | 0.421843 | 0.828 | 0.618 | 3.48E-29 | Mast cells | ST3GAL4  | 0.21  |
| 3.28E-32 | 0.519157 | 0.943 | 0.72  | 6.57E-29 | Mast cells | PRNP     | 0.223 |
| 6.46E-32 | 0.877985 | 0.992 | 0.925 | 1.29E-28 | Mast cells | NR4A1    | 0.067 |
| 1.07E-30 | 0.381637 | 0.893 | 0.681 | 2.15E-27 | Mast cells | TMEM154  | 0.212 |
| 2.62E-30 | 0.302879 | 0.877 | 0.636 | 5.25E-27 | Mast cells | TBXAS1   | 0.241 |
| 7.78E-30 | 0.774824 | 0.967 | 0.79  | 1.56E-26 | Mast cells | HSP90B1  | 0.177 |
| 1.14E-29 | 0.396755 | 0.893 | 0.694 | 2.27E-26 | Mast cells | MAST4    | 0.199 |
| 1.57E-29 | 0.757436 | 0.893 | 0.71  | 3.14E-26 | Mast cells | NSMCE1   | 0.183 |
| 1.61E-29 | 0.472378 | 0.992 | 0.975 | 3.22E-26 | Mast cells | FTL      | 0.017 |
| 5.31E-29 | 0.463153 | 0.852 | 0.639 | 1.06E-25 | Mast cells | PAK1     | 0.213 |
| 5.52E-28 | 0.648462 | 0.967 | 0.721 | 1.10E-24 | Mast cells | BIRC3    | 0.246 |
| 6.16E-28 | 0.64157  | 0.861 | 0.618 | 1.23E-24 | Mast cells | TNFSF10  | 0.243 |
| 1.12E-27 | 0.669147 | 0.967 | 0.757 | 2.23E-24 | Mast cells | EMP3     | 0.21  |
| 4.73E-27 | 0.694544 | 1     | 0.924 | 9.47E-24 | Mast cells | SRGN     | 0.076 |
| 5.55E-27 | 0.679935 | 0.975 | 0.82  | 1.11E-23 | Mast cells | REL      | 0.155 |
| 9.77E-27 | 0.356571 | 0.934 | 0.76  | 1.95E-23 | Mast cells | RBKS     | 0.174 |
| 9.94E-27 | 0.575034 | 0.836 | 0.593 | 1.99E-23 | Mast cells | CD38     | 0.243 |
| 2.14E-26 | 0.909072 | 1     | 0.945 | 4.27E-23 | Mast cells | BTG2     | 0.055 |
| 9.30E-26 | 0.654285 | 1     | 0.985 | 1.86E-22 | Mast cells | JUN      | 0.015 |
| 1.11E-25 | 0.410614 | 0.902 | 0.652 | 2.21E-22 | Mast cells | PSMD1    | 0.25  |
| 1.45E-25 | 0.266481 | 0.926 | 0.698 | 2.89E-22 | Mast cells | NFKB2    | 0.228 |
| 3.26E-25 | 0.692713 | 0.992 | 0.947 | 6.52E-22 | Mast cells | NFKBIA   | 0.045 |
| 3.63E-25 | 0.431632 | 0.91  | 0.74  | 7.26E-22 | Mast cells | SGK1     | 0.17  |
| 1.19E-24 | 0.408566 | 0.885 | 0.718 | 2.37E-21 | Mast cells | DDAH2    | 0.167 |
| 2.27E-23 | 0.460009 | 0.836 | 0.646 | 4.54E-20 | Mast cells | C1orf162 | 0.19  |
| 2.50E-23 | 0.622589 | 0.787 | 0.558 | 4.99E-20 | Mast cells | ACSL4    | 0.229 |
| 3.75E-23 | 0.692616 | 1     | 0.947 | 7.50E-20 | Mast cells | CD69     | 0.053 |
| 4.43E-23 | 0.294067 | 0.844 | 0.679 | 8.86E-20 | Mast cells | ANXA4    | 0.165 |
| 4.79E-23 | 0.536091 | 0.836 | 0.587 | 9.59E-20 | Mast cells | ZEB2     | 0.249 |
| 6.10E-23 | 0.645548 | 0.918 | 0.686 | 1.22E-19 | Mast cells | AHNAK    | 0.232 |

|          |          |       |       |          |            |         |       |
|----------|----------|-------|-------|----------|------------|---------|-------|
| 1.14E-22 | 0.305666 | 0.91  | 0.692 | 2.29E-19 | Mast cells | IFNGR1  | 0.218 |
| 1.17E-22 | 0.299779 | 0.934 | 0.766 | 2.35E-19 | Mast cells | LYPLA1  | 0.168 |
| 1.27E-22 | 0.434109 | 0.984 | 0.885 | 2.55E-19 | Mast cells | IFITM3  | 0.099 |
| 1.41E-22 | 0.498959 | 0.869 | 0.733 | 2.81E-19 | Mast cells | AHR     | 0.136 |
| 2.49E-22 | 0.836612 | 1     | 0.877 | 4.98E-19 | Mast cells | TNFAIP3 | 0.123 |
| 1.03E-21 | 0.332476 | 0.893 | 0.765 | 2.06E-18 | Mast cells | STMN1   | 0.128 |
| 1.07E-21 | 0.506975 | 0.91  | 0.673 | 2.14E-18 | Mast cells | BST2    | 0.237 |
| 1.50E-21 | 0.32027  | 0.926 | 0.738 | 3.00E-18 | Mast cells | CANX    | 0.188 |
| 1.62E-21 | 0.361553 | 0.951 | 0.801 | 3.24E-18 | Mast cells | PSAP    | 0.15  |
| 2.10E-21 | 0.530125 | 0.918 | 0.726 | 4.20E-18 | Mast cells | SAMSN1  | 0.192 |
| 2.83E-21 | 0.564991 | 0.926 | 0.792 | 5.66E-18 | Mast cells | RGS2    | 0.134 |
| 3.45E-21 | 0.350518 | 0.975 | 0.751 | 6.91E-18 | Mast cells | CDK2AP2 | 0.224 |
| 4.02E-21 | 0.420601 | 0.918 | 0.693 | 8.04E-18 | Mast cells | CNIH1   | 0.225 |
| 1.70E-20 | 0.29501  | 0.902 | 0.666 | 3.40E-17 | Mast cells | IFNGR2  | 0.236 |
| 2.10E-20 | 0.406803 | 0.811 | 0.675 | 4.21E-17 | Mast cells | FAM110A | 0.136 |
| 2.36E-20 | 0.328298 | 0.91  | 0.752 | 4.73E-17 | Mast cells | DDX39A  | 0.158 |
| 2.55E-20 | 0.417512 | 0.934 | 0.728 | 5.10E-17 | Mast cells | NR3C1   | 0.206 |
| 5.94E-20 | 0.422364 | 0.934 | 0.797 | 1.19E-16 | Mast cells | MTHFD2  | 0.137 |
| 1.02E-19 | 0.474816 | 0.893 | 0.777 | 2.03E-16 | Mast cells | TWISTNB | 0.116 |
| 1.39E-19 | 0.387243 | 0.803 | 0.717 | 2.77E-16 | Mast cells | LAT2    | 0.086 |
| 1.56E-19 | 0.350849 | 0.844 | 0.552 | 3.11E-16 | Mast cells | IGFLR1  | 0.292 |
| 1.76E-19 | 0.501429 | 0.844 | 0.728 | 3.52E-16 | Mast cells | LAPTM4A | 0.116 |
| 1.30E-18 | 0.478473 | 0.828 | 0.685 | 2.59E-15 | Mast cells | TESPA1  | 0.143 |
| 2.25E-18 | 0.37422  | 0.828 | 0.712 | 4.50E-15 | Mast cells | LAIR1   | 0.116 |
| 4.47E-18 | 0.499245 | 0.918 | 0.766 | 8.95E-15 | Mast cells | PLIN2   | 0.152 |
| 2.15E-17 | 0.466278 | 0.779 | 0.568 | 4.30E-14 | Mast cells | ARHGEF6 | 0.211 |
| 3.30E-17 | 0.314053 | 0.943 | 0.709 | 6.60E-14 | Mast cells | FKBP2   | 0.234 |
| 5.66E-17 | 0.428774 | 0.951 | 0.78  | 1.13E-13 | Mast cells | MT2A    | 0.171 |
| 6.59E-17 | 0.48222  | 0.738 | 0.584 | 1.32E-13 | Mast cells | BTK     | 0.154 |
| 1.31E-16 | 0.329685 | 0.811 | 0.663 | 2.63E-13 | Mast cells | MBOAT7  | 0.148 |
| 2.29E-16 | 0.506374 | 0.926 | 0.857 | 4.58E-13 | Mast cells | HSPA5   | 0.069 |
| 1.26E-15 | 0.410162 | 1     | 0.952 | 2.53E-12 | Mast cells | IER2    | 0.048 |
| 3.28E-15 | 0.335099 | 0.77  | 0.631 | 6.56E-12 | Mast cells | SWAP70  | 0.139 |
| 3.70E-15 | 0.387571 | 0.943 | 0.774 | 7.40E-12 | Mast cells | SYTL3   | 0.169 |
| 4.42E-15 | 0.362527 | 0.82  | 0.674 | 8.84E-12 | Mast cells | BCL2A1  | 0.146 |
| 1.30E-14 | 0.322997 | 0.828 | 0.714 | 2.60E-11 | Mast cells | SIL1    | 0.114 |
| 3.20E-14 | 0.300197 | 0.885 | 0.739 | 6.41E-11 | Mast cells | CHST12  | 0.146 |
| 3.68E-14 | 0.360463 | 0.779 | 0.672 | 7.37E-11 | Mast cells | ALAS1   | 0.107 |
| 1.10E-13 | 0.33176  | 1     | 0.857 | 2.21E-10 | Mast cells | CREM    | 0.143 |
| 1.53E-13 | 0.432615 | 0.828 | 0.763 | 3.07E-10 | Mast cells | TSC22D1 | 0.065 |
| 1.88E-13 | 0.377522 | 0.828 | 0.739 | 3.76E-10 | Mast cells | DNAJB4  | 0.089 |
| 2.89E-13 | 0.308916 | 0.943 | 0.802 | 5.79E-10 | Mast cells | TKT     | 0.141 |
| 1.29E-12 | 0.504227 | 0.992 | 0.892 | 2.58E-09 | Mast cells | DUSP2   | 0.1   |
| 2.70E-12 | 0.413186 | 0.738 | 0.587 | 5.40E-09 | Mast cells | BLVRA   | 0.151 |
| 1.29E-10 | 0.274065 | 0.689 | 0.556 | 2.58E-07 | Mast cells | ATP8B4  | 0.133 |
| 2.65E-10 | 0.315748 | 0.967 | 0.859 | 5.30E-07 | Mast cells | CDKN1A  | 0.108 |
| 1.54E-09 | 0.306843 | 0.967 | 0.819 | 3.07E-06 | Mast cells | DBI     | 0.148 |
| 2.45E-09 | 0.34815  | 0.975 | 0.895 | 4.90E-06 | Mast cells | NR4A2   | 0.08  |
| 2.88E-06 | 0.274064 | 0.951 | 0.916 | 0.005766 | Mast cells | DDIT4   | 0.035 |
| 0        | 2.635493 | 0.993 | 0.669 | 0        | Myeloid ce | TYROBP  | 0.324 |
| 0        | 2.174833 | 0.992 | 0.755 | 0        | Myeloid ce | HLA-DRA | 0.237 |
| 0        | 2.060709 | 0.989 | 0.775 | 0        | Myeloid ce | HLA-DRB | 0.214 |
| 0        | 1.996107 | 0.972 | 0.768 | 0        | Myeloid ce | HLA-DPA | 0.204 |
| 0        | 1.968425 | 1     | 0.974 | 0        | Myeloid ce | FTL     | 0.026 |
| 0        | 1.911501 | 0.987 | 0.796 | 0        | Myeloid ce | PSAP    | 0.191 |
| 0        | 1.904417 | 0.994 | 0.876 | 0        | Myeloid ce | CD74    | 0.118 |

|           |          |       |       |           |                          |       |
|-----------|----------|-------|-------|-----------|--------------------------|-------|
| 0         | 1.750975 | 0.97  | 0.642 | 0         | Myeloid ce AIF1          | 0.328 |
| 0         | 1.695424 | 0.955 | 0.581 | 0         | Myeloid ce IFI30         | 0.374 |
| 0         | 1.689474 | 0.964 | 0.736 | 0         | Myeloid ce HLA-DPB10.228 |       |
| 0         | 1.658015 | 0.96  | 0.705 | 0         | Myeloid ce NPC2          | 0.255 |
| 0         | 1.640785 | 0.949 | 0.678 | 0         | Myeloid ce HLA-DRB:0.271 |       |
| 0         | 1.618813 | 0.954 | 0.658 | 0         | Myeloid ce FCER1G        | 0.296 |
| 0         | 1.618725 | 0.97  | 0.679 | 0         | Myeloid ce HLA-DQB       | 0.291 |
| 0         | 1.47173  | 0.945 | 0.696 | 0         | Myeloid ce GRN           | 0.249 |
| 0         | 1.303426 | 0.972 | 0.63  | 0         | Myeloid ce RNF130        | 0.342 |
| 0         | 1.292071 | 0.983 | 0.674 | 0         | Myeloid ce HLA-DMB0.309  |       |
| 0         | 1.242159 | 0.938 | 0.746 | 0         | Myeloid ce FCGRT         | 0.192 |
| 0         | 1.225109 | 0.962 | 0.689 | 0         | Myeloid ce HLA-DMA0.273  |       |
| 0         | 1.193854 | 0.998 | 0.93  | 0         | Myeloid ce SAT1          | 0.068 |
| 0         | 1.192666 | 0.95  | 0.675 | 0         | Myeloid ce CTSS          | 0.275 |
| 0         | 1.103897 | 0.999 | 0.991 | 0         | Myeloid ce FTH1          | 0.008 |
| 0         | 1.097281 | 0.943 | 0.584 | 0         | Myeloid ce LST1          | 0.359 |
| 0         | 1.019238 | 0.943 | 0.627 | 0         | Myeloid ce CTSZ          | 0.316 |
| 0         | 0.895292 | 0.905 | 0.425 | 0         | Myeloid ce FGL2          | 0.48  |
| 0         | 0.891351 | 0.939 | 0.637 | 0         | Myeloid ce C1orf162      | 0.302 |
| 0         | 0.580387 | 0.941 | 0.555 | 0         | Myeloid ce NUDT16        | 0.386 |
| 0         | 0.558058 | 0.939 | 0.615 | 0         | Myeloid ce CCRL2         | 0.324 |
| 0         | 0.53094  | 0.948 | 0.567 | 0         | Myeloid ce GPR34         | 0.381 |
| 0         | 0.37829  | 0.902 | 0.585 | 0         | Myeloid ce PLD4          | 0.317 |
| 6.42E-306 | 1.102897 | 0.93  | 0.675 | 1.28E-302 | Myeloid ce CTSD          | 0.255 |
| 1.03E-305 | 0.326607 | 0.949 | 0.62  | 2.05E-302 | Myeloid ce NFKBIE        | 0.329 |
| 1.99E-304 | 0.706817 | 0.922 | 0.628 | 3.99E-301 | Myeloid ce TBXAS1        | 0.294 |
| 6.02E-304 | 0.456186 | 0.96  | 0.66  | 1.20E-300 | Myeloid ce PRCP          | 0.3   |
| 1.96E-302 | 0.733463 | 0.949 | 0.662 | 3.92E-299 | Myeloid ce MFSD1         | 0.287 |
| 3.87E-302 | 1.356594 | 0.953 | 0.658 | 7.74E-299 | Myeloid ce LGALS1        | 0.295 |
| 1.49E-300 | 0.848186 | 0.913 | 0.58  | 2.99E-297 | Myeloid ce PLEK          | 0.333 |
| 5.30E-298 | 0.856756 | 0.892 | 0.61  | 1.06E-294 | Myeloid ce HMOX1         | 0.282 |
| 7.95E-297 | 1.167439 | 0.951 | 0.729 | 1.59E-293 | Myeloid ce GLUL          | 0.222 |
| 1.04E-296 | 0.552985 | 0.888 | 0.59  | 2.07E-293 | Myeloid ce CLEC7A        | 0.298 |
| 3.07E-296 | 0.291859 | 0.939 | 0.636 | 6.15E-293 | Myeloid ce FHL3          | 0.303 |
| 2.92E-292 | 0.50072  | 0.902 | 0.52  | 5.83E-289 | Myeloid ce C3AR1         | 0.382 |
| 1.15E-290 | 0.754971 | 0.902 | 0.625 | 2.30E-287 | Myeloid ce RAB31         | 0.277 |
| 2.56E-287 | 0.496167 | 0.956 | 0.706 | 5.13E-284 | Myeloid ce ARL5B         | 0.25  |
| 2.55E-281 | 0.576988 | 0.955 | 0.765 | 5.10E-278 | Myeloid ce LYN           | 0.19  |
| 4.78E-275 | 1.022486 | 0.937 | 0.671 | 9.56E-272 | Myeloid ce ASAH1         | 0.266 |
| 2.35E-270 | 1.10408  | 0.959 | 0.792 | 4.71E-267 | Myeloid ce SOD2          | 0.167 |
| 2.44E-269 | 0.450161 | 0.934 | 0.659 | 4.88E-266 | Myeloid ce AP1B1         | 0.275 |
| 7.03E-268 | 0.709435 | 0.927 | 0.577 | 1.41E-264 | Myeloid ce ZEB2          | 0.35  |
| 1.98E-266 | 0.609475 | 0.962 | 0.781 | 3.96E-263 | Myeloid ce MAN2B1        | 0.181 |
| 2.42E-258 | 0.320269 | 0.871 | 0.442 | 4.84E-255 | Myeloid ce CAMK1         | 0.429 |
| 4.65E-256 | 1.600782 | 0.92  | 0.721 | 9.30E-253 | Myeloid ce CTSB          | 0.199 |
| 1.72E-254 | 0.334143 | 0.926 | 0.738 | 3.44E-251 | Myeloid ce GRASP         | 0.188 |
| 1.92E-251 | 0.302745 | 0.883 | 0.641 | 3.85E-248 | Myeloid ce 1-Mar         | 0.242 |
| 1.20E-250 | 0.285866 | 0.904 | 0.571 | 2.40E-247 | Myeloid ce RASSF2        | 0.333 |
| 2.05E-249 | 0.396361 | 0.931 | 0.655 | 4.09E-246 | Myeloid ce MBOAT7        | 0.276 |
| 2.36E-246 | 0.58501  | 0.914 | 0.645 | 4.71E-243 | Myeloid ce PGD           | 0.269 |
| 4.94E-245 | 0.918413 | 0.953 | 0.731 | 9.88E-242 | Myeloid ce ITGB2         | 0.222 |
| 1.69E-244 | 0.47022  | 0.887 | 0.611 | 3.38E-241 | Myeloid ce BASP1         | 0.276 |
| 3.02E-241 | 0.395557 | 0.916 | 0.711 | 6.04E-238 | Myeloid ce LAT2          | 0.205 |
| 4.58E-241 | 1.091177 | 0.894 | 0.642 | 9.16E-238 | Myeloid ce CCL3          | 0.252 |
| 6.23E-239 | 0.62232  | 0.868 | 0.683 | 1.25E-235 | Myeloid ce RNASE6        | 0.185 |
| 9.59E-236 | 0.410141 | 0.852 | 0.507 | 1.92E-232 | Myeloid ce CCDC88A       | 0.345 |

|           |          |       |       |           |                     |       |
|-----------|----------|-------|-------|-----------|---------------------|-------|
| 2.77E-235 | 0.339988 | 0.896 | 0.553 | 5.54E-232 | Myeloid ce HEXA     | 0.343 |
| 3.89E-235 | 1.314666 | 0.902 | 0.691 | 7.77E-232 | Myeloid ce HLA-DQA  | 0.211 |
| 7.26E-235 | 0.615785 | 0.966 | 0.734 | 1.45E-231 | Myeloid ce NR4A3    | 0.232 |
| 1.67E-233 | 0.398626 | 0.897 | 0.575 | 3.35E-230 | Myeloid ce GCA      | 0.322 |
| 6.19E-229 | 0.88106  | 0.894 | 0.605 | 1.24E-225 | Myeloid ce TYMP     | 0.289 |
| 9.78E-229 | 0.80956  | 0.92  | 0.713 | 1.96E-225 | Myeloid ce CTSH     | 0.207 |
| 1.90E-227 | 0.494165 | 0.875 | 0.705 | 3.80E-224 | Myeloid ce LY86     | 0.17  |
| 9.95E-227 | 0.854046 | 0.888 | 0.674 | 1.99E-223 | Myeloid ce LGMN     | 0.214 |
| 4.53E-225 | 0.444809 | 0.87  | 0.566 | 9.06E-222 | Myeloid ce ADA2     | 0.304 |
| 5.76E-225 | 0.418586 | 0.939 | 0.649 | 1.15E-221 | Myeloid ce ARHGAP1  | 0.29  |
| 1.85E-223 | 0.291889 | 0.931 | 0.667 | 3.71E-220 | Myeloid ce IRF8     | 0.264 |
| 6.99E-223 | 0.303598 | 0.914 | 0.631 | 1.40E-219 | Myeloid ce STX7     | 0.283 |
| 1.23E-221 | 0.269948 | 0.913 | 0.606 | 2.46E-218 | Myeloid ce MEF2A    | 0.307 |
| 6.97E-219 | 0.782037 | 0.922 | 0.649 | 1.39E-215 | Myeloid ce PPT1     | 0.273 |
| 1.73E-215 | 0.535808 | 0.919 | 0.714 | 3.45E-212 | Myeloid ce SLC16A3  | 0.205 |
| 2.57E-214 | 0.274127 | 0.914 | 0.592 | 5.14E-211 | Myeloid ce FUOM     | 0.322 |
| 4.19E-214 | 0.956371 | 0.948 | 0.791 | 8.38E-211 | Myeloid ce IER3     | 0.157 |
| 1.11E-213 | 0.508421 | 0.917 | 0.594 | 2.21E-210 | Myeloid ce TPP1     | 0.323 |
| 5.38E-212 | 0.477557 | 0.941 | 0.644 | 1.08E-208 | Myeloid ce AKR1B1   | 0.297 |
| 2.81E-208 | 0.745211 | 0.944 | 0.702 | 5.62E-205 | Myeloid ce ANXA5    | 0.242 |
| 9.07E-208 | 0.334327 | 0.896 | 0.622 | 1.81E-204 | Myeloid ce FUCA1    | 0.274 |
| 4.15E-207 | 0.935605 | 0.869 | 0.64  | 8.31E-204 | Myeloid ce CTSL     | 0.229 |
| 4.48E-207 | 0.874541 | 0.968 | 0.834 | 8.95E-204 | Myeloid ce CEBPD    | 0.134 |
| 1.36E-206 | 0.787129 | 0.926 | 0.753 | 2.73E-203 | Myeloid ce GRINA    | 0.173 |
| 1.93E-206 | 0.449472 | 0.914 | 0.697 | 3.86E-203 | Myeloid ce AP1S2    | 0.217 |
| 2.94E-206 | 0.673943 | 0.914 | 0.685 | 5.88E-203 | Myeloid ce NINJ1    | 0.229 |
| 8.18E-206 | 0.409272 | 0.95  | 0.692 | 1.64E-202 | Myeloid ce RASGEF11 | 0.258 |
| 8.10E-204 | 0.375231 | 0.876 | 0.624 | 1.62E-200 | Myeloid ce GNS      | 0.252 |
| 1.24E-203 | 0.704142 | 0.971 | 0.84  | 2.49E-200 | Myeloid ce CD83     | 0.131 |
| 2.08E-201 | 0.340389 | 0.925 | 0.667 | 4.16E-198 | Myeloid ce FAM110A  | 0.258 |
| 2.69E-198 | 0.375696 | 0.865 | 0.641 | 5.38E-195 | Myeloid ce SYK      | 0.224 |
| 1.14E-196 | 0.454605 | 0.862 | 0.634 | 2.27E-193 | Myeloid ce THEMIS2  | 0.228 |
| 6.35E-195 | 0.687388 | 0.914 | 0.698 | 1.27E-191 | Myeloid ce PYCARD   | 0.216 |
| 2.87E-194 | 0.628384 | 0.917 | 0.759 | 5.73E-191 | Myeloid ce ETS2     | 0.158 |
| 8.10E-193 | 0.336422 | 0.911 | 0.677 | 1.62E-189 | Myeloid ce ABHD12   | 0.234 |
| 9.14E-192 | 0.496245 | 0.937 | 0.685 | 1.83E-188 | Myeloid ce IFNGR1   | 0.252 |
| 3.55E-188 | 0.683559 | 0.91  | 0.743 | 7.10E-185 | Myeloid ce ICAM1    | 0.167 |
| 1.14E-186 | 0.29255  | 0.882 | 0.698 | 2.28E-183 | Myeloid ce MEF2C    | 0.184 |
| 1.70E-186 | 0.545494 | 0.95  | 0.768 | 3.39E-183 | Myeloid ce COMT     | 0.182 |
| 3.09E-185 | 0.265256 | 0.877 | 0.652 | 6.17E-182 | Myeloid ce ENG      | 0.225 |
| 2.74E-182 | 0.319304 | 0.926 | 0.682 | 5.49E-179 | Myeloid ce AGTRAP   | 0.244 |
| 3.99E-182 | 0.870581 | 0.988 | 0.902 | 7.97E-179 | Myeloid ce S100A11  | 0.086 |
| 4.57E-181 | 0.399383 | 0.841 | 0.515 | 9.14E-178 | Myeloid ce SNX10    | 0.326 |
| 3.83E-178 | 0.337041 | 0.951 | 0.834 | 7.66E-175 | Myeloid ce KLF4     | 0.117 |
| 6.74E-177 | 0.401999 | 0.941 | 0.683 | 1.35E-173 | Myeloid ce CRTAP    | 0.258 |
| 6.81E-176 | 0.483458 | 0.863 | 0.684 | 1.36E-172 | Myeloid ce CREG1    | 0.179 |
| 1.21E-174 | 0.651357 | 0.96  | 0.746 | 2.42E-171 | Myeloid ce YWHAH    | 0.214 |
| 6.63E-174 | 0.444438 | 0.947 | 0.718 | 1.33E-170 | Myeloid ce GLRX     | 0.229 |
| 7.56E-174 | 0.673943 | 0.961 | 0.836 | 1.51E-170 | Myeloid ce RNASET2  | 0.125 |
| 2.56E-172 | 0.874608 | 0.921 | 0.718 | 5.13E-169 | Myeloid ce CD63     | 0.203 |
| 6.97E-172 | 0.375286 | 0.924 | 0.658 | 1.39E-168 | Myeloid ce SERPINB9 | 0.266 |
| 7.17E-172 | 0.505873 | 0.953 | 0.754 | 1.43E-168 | Myeloid ce RBKS     | 0.199 |
| 1.57E-171 | 0.414443 | 0.865 | 0.615 | 3.13E-168 | Myeloid ce LGALS9   | 0.25  |
| 2.60E-169 | 0.36186  | 0.953 | 0.736 | 5.21E-166 | Myeloid ce SPINT2   | 0.217 |
| 7.90E-169 | 0.677903 | 0.933 | 0.722 | 1.58E-165 | Myeloid ce CAPG     | 0.211 |
| 1.38E-168 | 1.112959 | 0.971 | 0.868 | 2.77E-165 | Myeloid ce AREG     | 0.103 |



|           |          |       |       |           |                      |       |
|-----------|----------|-------|-------|-----------|----------------------|-------|
| 1.25E-165 | 0.283665 | 0.93  | 0.749 | 2.51E-162 | Myeloid ce EIF4EBP1  | 0.181 |
| 1.39E-165 | 0.371787 | 0.947 | 0.683 | 2.79E-162 | Myeloid ce JAML      | 0.264 |
| 1.28E-164 | 1.038174 | 0.908 | 0.752 | 2.56E-161 | Myeloid ce TIMP1     | 0.156 |
| 1.15E-162 | 0.556509 | 0.857 | 0.661 | 2.31E-159 | Myeloid ce IFNGR2    | 0.196 |
| 1.50E-162 | 0.701073 | 0.972 | 0.836 | 3.01E-159 | Myeloid ce COTL1     | 0.136 |
| 3.42E-160 | 0.650156 | 0.966 | 0.8   | 6.84E-157 | Myeloid ce PKM       | 0.166 |
| 2.73E-158 | 0.348662 | 0.858 | 0.621 | 5.45E-155 | Myeloid ce SCPEP1    | 0.237 |
| 5.99E-156 | 0.36923  | 0.921 | 0.717 | 1.20E-152 | Myeloid ce SNX2      | 0.204 |
| 6.20E-156 | 0.521347 | 0.921 | 0.706 | 1.24E-152 | Myeloid ce MGAT1     | 0.215 |
| 2.63E-153 | 0.652611 | 0.956 | 0.831 | 5.27E-150 | Myeloid ce LITAF     | 0.125 |
| 2.98E-152 | 0.873641 | 0.848 | 0.669 | 5.95E-149 | Myeloid ce BCL2A1    | 0.179 |
| 2.13E-151 | 0.36351  | 0.903 | 0.766 | 4.27E-148 | Myeloid ce BRI3      | 0.137 |
| 1.44E-150 | 0.369501 | 0.9   | 0.663 | 2.87E-147 | Myeloid ce NCOA4     | 0.237 |
| 2.42E-148 | 0.735266 | 0.919 | 0.782 | 4.84E-145 | Myeloid ce NAMPT     | 0.137 |
| 3.68E-147 | 0.386741 | 0.914 | 0.668 | 7.35E-144 | Myeloid ce CD4       | 0.246 |
| 5.93E-147 | 0.299171 | 0.917 | 0.748 | 1.19E-143 | Myeloid ce GLA       | 0.169 |
| 8.50E-147 | 0.321936 | 0.809 | 0.51  | 1.70E-143 | Myeloid ce SKAP2     | 0.299 |
| 1.00E-146 | 0.70818  | 0.93  | 0.761 | 2.00E-143 | Myeloid ce PLIN2     | 0.169 |
| 4.16E-146 | 0.405423 | 0.801 | 0.592 | 8.32E-143 | Myeloid ce ACSL1     | 0.209 |
| 1.87E-144 | 0.57418  | 0.904 | 0.735 | 3.74E-141 | Myeloid ce SGK1      | 0.169 |
| 1.07E-143 | 0.571188 | 0.9   | 0.671 | 2.14E-140 | Myeloid ce CTSA      | 0.229 |
| 5.93E-143 | 0.430857 | 0.9   | 0.759 | 1.19E-139 | Myeloid ce GK        | 0.141 |
| 3.60E-140 | 0.53284  | 0.864 | 0.702 | 7.19E-137 | Myeloid ce PPIF      | 0.162 |
| 2.61E-138 | 0.413423 | 0.925 | 0.72  | 5.23E-135 | Myeloid ce CCL4      | 0.205 |
| 1.83E-137 | 0.411277 | 0.886 | 0.714 | 3.65E-134 | Myeloid ce PTPRE     | 0.172 |
| 2.15E-136 | 0.408771 | 0.941 | 0.702 | 4.30E-133 | Myeloid ce UQCRC1    | 0.239 |
| 1.60E-134 | 0.534043 | 0.958 | 0.842 | 3.19E-131 | Myeloid ce CEBPB     | 0.116 |
| 2.84E-134 | 0.636637 | 0.937 | 0.754 | 5.67E-131 | Myeloid ce ANXA2     | 0.183 |
| 6.59E-134 | 0.598236 | 0.932 | 0.792 | 1.32E-130 | Myeloid ce KDM6B     | 0.14  |
| 1.63E-132 | 0.485557 | 1     | 0.987 | 3.26E-129 | Myeloid ce ACTB      | 0.013 |
| 4.76E-132 | 0.563283 | 0.903 | 0.752 | 9.52E-129 | Myeloid ce AP2S1     | 0.151 |
| 2.13E-131 | 0.276985 | 0.897 | 0.655 | 4.26E-128 | Myeloid ce SEC14L1   | 0.242 |
| 1.44E-130 | 0.499303 | 0.903 | 0.676 | 2.89E-127 | Myeloid ce AKR1A1    | 0.227 |
| 2.85E-130 | 0.281565 | 0.955 | 0.757 | 5.70E-127 | Myeloid ce PTMS      | 0.198 |
| 1.77E-128 | 0.4678   | 0.837 | 0.601 | 3.54E-125 | Myeloid ce APLP2     | 0.236 |
| 8.70E-128 | 0.433102 | 0.835 | 0.651 | 1.74E-124 | Myeloid ce BID       | 0.184 |
| 8.23E-126 | 0.606422 | 0.885 | 0.675 | 1.65E-122 | Myeloid ce PLD3      | 0.21  |
| 7.33E-124 | 0.570303 | 0.943 | 0.665 | 1.47E-120 | Myeloid ce BST2      | 0.278 |
| 6.63E-122 | 0.475671 | 0.949 | 0.783 | 1.33E-118 | Myeloid ce ARPC5     | 0.166 |
| 1.04E-121 | 0.695561 | 0.953 | 0.73  | 2.08E-118 | Myeloid ce CTSC      | 0.223 |
| 1.82E-120 | 0.347744 | 0.865 | 0.691 | 3.64E-117 | Myeloid ce ATP2B1-A  | 0.174 |
| 3.53E-119 | 0.305226 | 0.959 | 0.781 | 7.06E-116 | Myeloid ce PER1      | 0.178 |
| 1.21E-118 | 0.518135 | 0.953 | 0.803 | 2.41E-115 | Myeloid ce CLTA      | 0.15  |
| 3.45E-118 | 0.5492   | 0.937 | 0.788 | 6.90E-115 | Myeloid ce RGS2      | 0.149 |
| 1.79E-115 | 0.502925 | 0.904 | 0.743 | 3.58E-112 | Myeloid ce VSIR      | 0.161 |
| 6.91E-115 | 0.282393 | 0.876 | 0.745 | 1.38E-111 | Myeloid ce BLVRB     | 0.131 |
| 4.21E-110 | 0.348574 | 0.931 | 0.761 | 8.42E-107 | Myeloid ce RILPL2    | 0.17  |
| 4.94E-108 | 0.52402  | 0.892 | 0.726 | 9.89E-105 | Myeloid ce TALDO1    | 0.166 |
| 4.05E-107 | 0.285198 | 0.816 | 0.623 | 8.11E-104 | Myeloid ce ATP6V1B20 | 0.193 |
| 2.95E-106 | 0.326337 | 0.899 | 0.735 | 5.89E-103 | Myeloid ce HSBP1     | 0.164 |
| 1.52E-102 | 0.429888 | 0.936 | 0.786 | 3.04E-99  | Myeloid ce SYNGR2    | 0.15  |
| 1.15E-100 | 0.277465 | 0.777 | 0.575 | 2.30E-97  | Myeloid ce DSE       | 0.202 |
| 2.18E-97  | 0.383798 | 0.972 | 0.855 | 4.36E-94  | Myeloid ce GSTP1     | 0.117 |
| 1.62E-96  | 0.439633 | 0.928 | 0.798 | 3.24E-93  | Myeloid ce TKT       | 0.13  |
| 3.33E-96  | 0.340696 | 0.907 | 0.733 | 6.66E-93  | Myeloid ce CANX      | 0.174 |
| 1.12E-95  | 0.352029 | 0.93  | 0.766 | 2.24E-92  | Myeloid ce MYDGF     | 0.164 |

|           |          |       |       |           |                     |       |
|-----------|----------|-------|-------|-----------|---------------------|-------|
| 1.20E-93  | 0.498371 | 0.948 | 0.781 | 2.39E-90  | Myeloid ce LSP1     | 0.167 |
| 9.83E-93  | 0.425821 | 0.891 | 0.714 | 1.97E-89  | Myeloid ce SERPINB1 | 0.177 |
| 5.77E-92  | 0.314704 | 0.916 | 0.759 | 1.15E-88  | Myeloid ce CHMP1B   | 0.157 |
| 1.71E-90  | 0.294034 | 0.881 | 0.68  | 3.42E-87  | Myeloid ce SAMHD1   | 0.201 |
| 3.16E-88  | 0.358406 | 0.927 | 0.781 | 6.32E-85  | Myeloid ce TPM4     | 0.146 |
| 1.55E-87  | 0.59111  | 0.853 | 0.704 | 3.10E-84  | Myeloid ce ACP5     | 0.149 |
| 8.56E-87  | 0.301785 | 0.778 | 0.581 | 1.71E-83  | Myeloid ce BLVRA    | 0.197 |
| 2.92E-84  | 0.276128 | 0.96  | 0.801 | 5.85E-81  | Myeloid ce JPT1     | 0.159 |
| 8.00E-83  | 0.418862 | 0.987 | 0.951 | 1.60E-79  | Myeloid ce H3F3A    | 0.036 |
| 4.67E-82  | 0.421446 | 0.892 | 0.732 | 9.34E-79  | Myeloid ce ATOX1    | 0.16  |
| 3.27E-80  | 0.47844  | 0.934 | 0.718 | 6.55E-77  | Myeloid ce ALOX5AP  | 0.216 |
| 5.40E-80  | 0.602109 | 0.758 | 0.565 | 1.08E-76  | Myeloid ce CCL4L2   | 0.193 |
| 1.02E-78  | 0.292624 | 0.945 | 0.834 | 2.04E-75  | Myeloid ce FABP5    | 0.111 |
| 3.22E-77  | 0.468737 | 0.994 | 0.922 | 6.44E-74  | Myeloid ce SRGN     | 0.072 |
| 3.23E-76  | 0.324223 | 0.956 | 0.815 | 6.45E-73  | Myeloid ce DBI      | 0.141 |
| 3.61E-75  | 0.319138 | 0.999 | 0.993 | 7.23E-72  | Myeloid ce TMSB10   | 0.006 |
| 8.59E-75  | 0.322653 | 0.954 | 0.868 | 1.72E-71  | Myeloid ce RAC1     | 0.086 |
| 6.30E-74  | 0.395118 | 0.933 | 0.752 | 1.26E-70  | Myeloid ce EMP3     | 0.181 |
| 2.37E-71  | 0.304943 | 0.934 | 0.807 | 4.73E-68  | Myeloid ce EIF4A3   | 0.127 |
| 1.13E-65  | 0.349362 | 0.976 | 0.897 | 2.27E-62  | Myeloid ce SLC25A5  | 0.079 |
| 1.20E-65  | 0.461251 | 0.934 | 0.839 | 2.41E-62  | Myeloid ce CSTB     | 0.095 |
| 4.12E-64  | 0.316206 | 0.976 | 0.843 | 8.24E-61  | Myeloid ce ATP5MC3  | 0.133 |
| 1.74E-63  | 0.322145 | 0.977 | 0.894 | 3.49E-60  | Myeloid ce VIM      | 0.083 |
| 2.41E-57  | 0.395469 | 0.976 | 0.872 | 4.82E-54  | Myeloid ce HSPA1A   | 0.104 |
| 5.49E-57  | 0.356874 | 0.945 | 0.817 | 1.10E-53  | Myeloid ce REL      | 0.128 |
| 2.37E-56  | 0.476485 | 0.752 | 0.627 | 4.74E-53  | Myeloid ce LIPA     | 0.125 |
| 3.20E-55  | 0.266155 | 0.769 | 0.589 | 6.40E-52  | Myeloid ce GSTO1    | 0.18  |
| 6.35E-55  | 0.280526 | 0.984 | 0.855 | 1.27E-51  | Myeloid ce HMGN2    | 0.129 |
| 1.18E-54  | 0.299162 | 1     | 0.988 | 2.36E-51  | Myeloid ce TMSB4X   | 0.012 |
| 4.32E-54  | 0.279024 | 0.718 | 0.563 | 8.64E-51  | Myeloid ce TNFSF13B | 0.155 |
| 5.05E-43  | 0.414082 | 0.822 | 0.769 | 1.01E-39  | Myeloid ce UPP1     | 0.053 |
| 3.50E-33  | 0.309787 | 0.62  | 0.378 | 7.01E-30  | Myeloid ce CALHM6   | 0.242 |
| 4.33E-30  | 0.302821 | 0.959 | 0.903 | 8.67E-27  | Myeloid ce TUBA1B   | 0.056 |
| 0         | 2.328513 | 0.995 | 0.758 | 0         | NK cells NKG7       | 0.237 |
| 0         | 2.107638 | 0.98  | 0.598 | 0         | NK cells KLRD1      | 0.382 |
| 5.07E-298 | 2.824422 | 0.975 | 0.723 | 1.01E-294 | NK cells GNLY       | 0.252 |
| 1.69E-272 | 1.596004 | 0.966 | 0.673 | 3.39E-269 | NK cells TYROBP     | 0.293 |
| 3.31E-261 | 1.675957 | 0.953 | 0.661 | 6.61E-258 | NK cells PRF1       | 0.292 |
| 3.77E-242 | 1.47914  | 0.944 | 0.69  | 7.53E-239 | NK cells CTSW       | 0.254 |
| 4.58E-233 | 1.462226 | 0.921 | 0.657 | 9.16E-230 | NK cells CLIC3      | 0.264 |
| 3.05E-232 | 1.729674 | 0.939 | 0.735 | 6.10E-229 | NK cells GZMB       | 0.204 |
| 1.56E-216 | 2.031765 | 0.975 | 0.869 | 3.13E-213 | NK cells AREG       | 0.106 |
| 6.43E-215 | 1.305068 | 0.96  | 0.698 | 1.29E-211 | NK cells CST7       | 0.262 |
| 5.55E-208 | 1.199604 | 0.897 | 0.663 | 1.11E-204 | NK cells FCER1G     | 0.234 |
| 5.68E-202 | 2.187539 | 0.937 | 0.722 | 1.14E-198 | NK cells CCL4       | 0.215 |
| 5.47E-201 | 0.715249 | 0.856 | 0.602 | 1.09E-197 | NK cells PTGDR      | 0.254 |
| 4.42E-195 | 0.694422 | 0.847 | 0.503 | 8.84E-192 | NK cells IGFBP2     | 0.344 |
| 9.14E-193 | 1.390989 | 0.991 | 0.89  | 1.83E-189 | NK cells DUSP2      | 0.101 |
| 1.19E-186 | 1.23834  | 0.987 | 0.816 | 2.39E-183 | NK cells CD7        | 0.171 |
| 3.70E-181 | 1.363008 | 0.901 | 0.695 | 7.40E-178 | NK cells SPON2      | 0.206 |
| 5.90E-175 | 0.999215 | 0.906 | 0.761 | 1.18E-171 | NK cells TMIGD2     | 0.145 |
| 1.38E-169 | 0.897969 | 0.993 | 0.923 | 2.77E-166 | NK cells SRGN       | 0.07  |
| 1.20E-166 | 1.745118 | 0.858 | 0.645 | 2.40E-163 | NK cells CCL3       | 0.213 |
| 4.65E-164 | 0.954737 | 0.876 | 0.674 | 9.30E-161 | NK cells TXK        | 0.202 |
| 3.44E-163 | 1.016109 | 0.897 | 0.715 | 6.88E-160 | NK cells CMC1       | 0.182 |
| 4.90E-155 | 0.932932 | 0.944 | 0.833 | 9.81E-152 | NK cells LITAF      | 0.111 |

|           |          |       |       |           |          |         |        |
|-----------|----------|-------|-------|-----------|----------|---------|--------|
| 6.39E-149 | 0.91     | 0.973 | 0.852 | 1.28E-145 | NK cells | SOCS1   | 0.121  |
| 1.11E-145 | 1.003679 | 0.939 | 0.779 | 2.22E-142 | NK cells | CCL5    | 0.16   |
| 1.73E-142 | 0.794184 | 0.951 | 0.836 | 3.46E-139 | NK cells | CEBPD   | 0.115  |
| 8.20E-140 | 0.959989 | 0.991 | 0.967 | 1.64E-136 | NK cells | ZFP36   | 0.024  |
| 8.76E-137 | 0.908656 | 0.858 | 0.652 | 1.75E-133 | NK cells | HOPX    | 0.206  |
| 9.36E-137 | 0.44539  | 0.825 | 0.681 | 1.87E-133 | NK cells | GFOD1   | 0.144  |
| 1.12E-132 | 0.791747 | 0.923 | 0.772 | 2.25E-129 | NK cells | SYTL3   | 0.151  |
| 1.25E-131 | 0.852866 | 0.917 | 0.795 | 2.50E-128 | NK cells | CD247   | 0.122  |
| 9.26E-130 | 0.726499 | 0.973 | 0.903 | 1.85E-126 | NK cells | IFITM1  | 0.07   |
| 1.69E-128 | 0.400971 | 0.85  | 0.742 | 3.38E-125 | NK cells | GRASP   | 0.108  |
| 2.40E-122 | 0.295476 | 0.825 | 0.671 | 4.79E-119 | NK cells | TLE1    | 0.154  |
| 3.81E-114 | 0.794281 | 0.95  | 0.809 | 7.62E-111 | NK cells | KLRB1   | 0.141  |
| 7.46E-113 | 0.609191 | 0.795 | 0.647 | 1.49E-109 | NK cells | AOAH    | 0.148  |
| 2.58E-111 | 0.518097 | 0.811 | 0.663 | 5.15E-108 | NK cells | ADRB2   | 0.148  |
| 2.58E-110 | 0.545855 | 0.858 | 0.737 | 5.16E-107 | NK cells | CHST12  | 0.121  |
| 3.67E-107 | 0.366234 | 1     | 0.982 | 7.34E-104 | NK cells | MT-CO1  | 0.018  |
| 3.33E-105 | 0.870044 | 0.87  | 0.702 | 6.66E-102 | NK cells | GZMA    | 0.168  |
| 3.71E-104 | 0.776346 | 0.95  | 0.894 | 7.43E-101 | NK cells | NR4A2   | 0.056  |
| 1.16E-98  | 0.689486 | 0.98  | 0.952 | 2.32E-95  | NK cells | IER2    | 0.028  |
| 1.45E-98  | 0.734685 | 0.993 | 0.961 | 2.90E-95  | NK cells | DUSP1   | 0.032  |
| 1.60E-95  | 0.604738 | 0.868 | 0.758 | 3.20E-92  | NK cells | RBKS    | 0.11   |
| 1.38E-91  | 0.498244 | 0.807 | 0.653 | 2.76E-88  | NK cells | PLAC8   | 0.154  |
| 1.76E-91  | 0.755198 | 0.96  | 0.902 | 3.53E-88  | NK cells | GADD45B | 0.058  |
| 7.38E-90  | 0.66672  | 0.814 | 0.662 | 1.48E-86  | NK cells | IL2RB   | 0.152  |
| 4.30E-86  | 0.596477 | 0.85  | 0.735 | 8.60E-83  | NK cells | GPR65   | 0.115  |
| 1.86E-81  | 0.346094 | 0.786 | 0.69  | 3.72E-78  | NK cells | RIN3    | 0.096  |
| 5.01E-81  | 0.613673 | 0.924 | 0.848 | 1.00E-77  | NK cells | PMAIP1  | 0.076  |
| 5.95E-81  | 0.37671  | 0.834 | 0.69  | 1.19E-77  | NK cells | ZBTB16  | 0.144  |
| 2.01E-79  | 0.598618 | 0.991 | 0.946 | 4.01E-76  | NK cells | CD69    | 0.045  |
| 2.07E-78  | 0.604494 | 0.995 | 0.978 | 4.14E-75  | NK cells | FOS     | 0.017  |
| 3.75E-78  | 0.32181  | 0.822 | 0.71  | 7.50E-75  | NK cells | LAIR1   | 0.112  |
| 1.22E-77  | 0.760918 | 0.975 | 0.945 | 2.43E-74  | NK cells | BTG2    | 0.03   |
| 1.74E-77  | 0.448291 | 0.894 | 0.816 | 3.48E-74  | NK cells | H2AFX   | 0.078  |
| 6.74E-77  | 0.575182 | 0.915 | 0.803 | 1.35E-73  | NK cells | LCP1    | 0.112  |
| 1.01E-75  | 0.493331 | 0.953 | 0.882 | 2.01E-72  | NK cells | CITED2  | 0.071  |
| 2.90E-75  | 0.526115 | 0.899 | 0.778 | 5.81E-72  | NK cells | CLEC2B  | 0.121  |
| 5.34E-75  | 0.582821 | 0.962 | 0.915 | 1.07E-71  | NK cells | DDIT4   | 0.047  |
| 1.95E-74  | 0.312671 | 0.85  | 0.758 | 3.91E-71  | NK cells | FAM53C  | 0.092  |
| 3.37E-72  | 0.499878 | 0.874 | 0.768 | 6.74E-69  | NK cells | UPP1    | 0.106  |
| 5.71E-71  | 0.543753 | 0.827 | 0.718 | 1.14E-67  | NK cells | EFHD2   | 0.109  |
| 5.50E-70  | 0.428095 | 0.753 | 0.651 | 1.10E-66  | NK cells | PTGER2  | 0.102  |
| 6.79E-70  | 0.370355 | 0.82  | 0.765 | 1.36E-66  | NK cells | PXN     | 0.055  |
| 3.37E-69  | 0.26749  | 0.825 | 0.703 | 6.75E-66  | NK cells | SH3BP1  | 0.122  |
| 1.13E-66  | 0.533541 | 0.777 | 0.637 | 2.26E-63  | NK cells | APOBEC3 | 0.14   |
| 1.31E-66  | 0.48753  | 0.84  | 0.739 | 2.63E-63  | NK cells | SH2D2A  | 0.101  |
| 5.01E-66  | 0.307939 | 0.843 | 0.695 | 1.00E-62  | NK cells | S1PR4   | 0.148  |
| 7.45E-66  | 0.392449 | 0.84  | 0.707 | 1.49E-62  | NK cells | ABI3    | 0.133  |
| 3.41E-64  | 0.435374 | 0.912 | 0.814 | 6.82E-61  | NK cells | ID2     | 0.098  |
| 6.91E-64  | 0.388777 | 0.802 | 0.704 | 1.38E-60  | NK cells | GABARAF | 0.098  |
| 2.16E-63  | 0.614264 | 0.955 | 0.901 | 4.32E-60  | NK cells | KLF2    | 0.054  |
| 2.22E-63  | 0.383333 | 0.903 | 0.842 | 4.44E-60  | NK cells | DDIT3   | 0.061  |
| 1.81E-60  | 0.483248 | 0.755 | 0.758 | 3.63E-57  | NK cells | ADGRG1  | -0.003 |
| 4.33E-60  | 0.293458 | 0.829 | 0.681 | 8.65E-57  | NK cells | LYST    | 0.148  |
| 6.90E-60  | 0.333368 | 0.832 | 0.698 | 1.38E-56  | NK cells | RASGEF1 | 0.134  |
| 2.05E-59  | 0.28971  | 0.845 | 0.762 | 4.10E-56  | NK cells | BCL3    | 0.083  |
| 6.72E-59  | 0.39786  | 0.712 | 0.589 | 1.34E-55  | NK cells | PLEK    | 0.123  |

|          |          |       |       |          |          |           |       |
|----------|----------|-------|-------|----------|----------|-----------|-------|
| 1.07E-58 | 0.632515 | 0.98  | 0.947 | 2.14E-55 | NK cells | NFKBIA    | 0.033 |
| 3.19E-57 | 0.440445 | 0.885 | 0.758 | 6.39E-54 | NK cells | ZC3H12A   | 0.127 |
| 1.91E-55 | 0.540243 | 0.865 | 0.722 | 3.83E-52 | NK cells | ALOX5AP   | 0.143 |
| 4.75E-54 | 0.302591 | 0.741 | 0.665 | 9.50E-51 | NK cells | LPCAT1    | 0.076 |
| 1.66E-53 | 0.389281 | 0.917 | 0.856 | 3.32E-50 | NK cells | RHOB      | 0.061 |
| 3.98E-53 | 0.410181 | 0.759 | 0.695 | 7.95E-50 | NK cells | GLIPR2    | 0.064 |
| 1.35E-52 | 0.285736 | 0.789 | 0.718 | 2.70E-49 | NK cells | PTPRE     | 0.071 |
| 2.50E-52 | 0.338808 | 0.807 | 0.689 | 5.00E-49 | NK cells | TNFRSF180 | 0.118 |
| 6.82E-52 | 0.332242 | 0.987 | 0.953 | 1.36E-48 | NK cells | PFN1      | 0.034 |
| 1.23E-51 | 0.335107 | 0.883 | 0.791 | 2.46E-48 | NK cells | RGS2      | 0.092 |
| 4.33E-51 | 0.452722 | 0.726 | 0.585 | 8.67E-48 | NK cells | ZEB2      | 0.141 |
| 2.02E-48 | 0.384048 | 0.829 | 0.711 | 4.03E-45 | NK cells | SLA       | 0.118 |
| 5.05E-45 | 0.315291 | 0.814 | 0.747 | 1.01E-41 | NK cells | ICAM1     | 0.067 |
| 7.57E-45 | 0.296564 | 0.809 | 0.702 | 1.51E-41 | NK cells | TIPARP    | 0.107 |
| 2.11E-44 | 0.434299 | 0.822 | 0.722 | 4.21E-41 | NK cells | GNG2      | 0.1   |
| 6.75E-44 | 0.386464 | 0.798 | 0.759 | 1.35E-40 | NK cells | MAP3K8    | 0.039 |
| 1.31E-43 | 0.548268 | 0.863 | 0.766 | 2.63E-40 | NK cells | ANXA1     | 0.097 |
| 1.50E-43 | 0.371437 | 0.975 | 0.953 | 3.00E-40 | NK cells | FOSB      | 0.022 |
| 4.19E-43 | 0.36128  | 0.787 | 0.704 | 8.37E-40 | NK cells | BHLHE40   | 0.083 |
| 2.67E-42 | 0.305244 | 0.82  | 0.711 | 5.35E-39 | NK cells | PIM1      | 0.109 |
| 4.61E-42 | 0.531264 | 0.912 | 0.882 | 9.22E-39 | NK cells | RGCC      | 0.03  |
| 6.41E-41 | 0.37273  | 0.759 | 0.704 | 1.28E-37 | NK cells | LYAR      | 0.055 |
| 9.77E-41 | 0.266173 | 0.856 | 0.766 | 1.95E-37 | NK cells | GIMAP7    | 0.09  |
| 9.22E-40 | 0.356396 | 0.823 | 0.736 | 1.84E-36 | NK cells | ITGB2     | 0.087 |
| 4.46E-39 | 0.317779 | 0.807 | 0.697 | 8.91E-36 | NK cells | ARL4C     | 0.11  |
| 2.27E-38 | 0.314679 | 0.818 | 0.754 | 4.54E-35 | NK cells | PTP4A1    | 0.064 |
| 2.44E-37 | 0.296879 | 0.942 | 0.887 | 4.87E-34 | NK cells | TAGAP     | 0.055 |
| 3.71E-37 | 0.374685 | 0.996 | 0.982 | 7.42E-34 | NK cells | JUNB      | 0.014 |
| 1.23E-36 | 0.332035 | 0.721 | 0.718 | 2.47E-33 | NK cells | LAT2      | 0.003 |
| 1.26E-36 | 0.301561 | 0.712 | 0.636 | 2.51E-33 | NK cells | RNF125    | 0.076 |
| 1.11E-35 | 0.354362 | 0.924 | 0.866 | 2.21E-32 | NK cells | LDHA      | 0.058 |
| 3.45E-35 | 0.287587 | 0.854 | 0.733 | 6.91E-32 | NK cells | GLIPR1    | 0.121 |
| 8.36E-35 | 0.279266 | 0.773 | 0.681 | 1.67E-31 | NK cells | DOK2      | 0.092 |
| 1.85E-34 | 0.466509 | 0.894 | 0.778 | 3.71E-31 | NK cells | MT2A      | 0.116 |
| 2.95E-34 | 0.488029 | 0.915 | 0.841 | 5.89E-31 | NK cells | NFKBIZ    | 0.074 |
| 3.01E-34 | 0.294169 | 0.95  | 0.925 | 6.01E-31 | NK cells | NR4A1     | 0.025 |
| 4.50E-34 | 0.329432 | 0.76  | 0.72  | 8.99E-31 | NK cells | SLC16A3   | 0.04  |
| 1.76E-33 | 0.32021  | 0.874 | 0.806 | 3.53E-30 | NK cells | XBP1      | 0.068 |
| 6.24E-33 | 0.283224 | 0.764 | 0.736 | 1.25E-29 | NK cells | RUNX3     | 0.028 |
| 3.08E-31 | 0.344439 | 0.912 | 0.878 | 6.17E-28 | NK cells | ATF3      | 0.034 |
| 9.30E-31 | 0.294323 | 0.852 | 0.837 | 1.86E-27 | NK cells | NFKB1     | 0.015 |
| 9.23E-27 | 0.583777 | 0.645 | 0.57  | 1.85E-23 | NK cells | CCL4L2    | 0.075 |
| 5.33E-26 | 0.268278 | 0.742 | 0.692 | 1.07E-22 | NK cells | IFNGR1    | 0.05  |
| 3.51E-25 | 0.315316 | 0.67  | 0.604 | 7.01E-22 | NK cells | TPST2     | 0.066 |
| 1.37E-24 | 0.271255 | 0.831 | 0.778 | 2.74E-21 | NK cells | NEU1      | 0.053 |
| 2.22E-23 | 0.263659 | 0.98  | 0.956 | 4.44E-20 | NK cells | KLF6      | 0.024 |
| 1.51E-22 | 0.39598  | 0.946 | 0.919 | 3.03E-19 | NK cells | EGR1      | 0.027 |
| 1.32E-17 | 0.266828 | 0.946 | 0.874 | 2.64E-14 | NK cells | HSPA1A    | 0.072 |
| 1.75E-12 | 0.32228  | 0.989 | 0.985 | 3.49E-09 | NK cells | JUN       | 0.004 |
| 0        | 1.843763 | 0.956 | 0.755 | 0        | T cells  | IL7R      | 0.201 |
| 0        | 1.692324 | 0.939 | 0.763 | 0        | T cells  | CD3D      | 0.176 |
| 0        | 1.504735 | 0.826 | 0.709 | 0        | T cells  | CCL5      | 0.117 |
| 0        | 1.413319 | 0.963 | 0.808 | 0        | T cells  | IL32      | 0.155 |
| 0        | 1.282829 | 0.958 | 0.743 | 0        | T cells  | TNFAIP3   | 0.215 |
| 0        | 1.16029  | 0.852 | 0.746 | 0        | T cells  | KLRB1     | 0.106 |
| 0        | 1.116741 | 0.906 | 0.774 | 0        | T cells  | S100A4    | 0.132 |

|   |          |       |       |   |         |               |       |
|---|----------|-------|-------|---|---------|---------------|-------|
| 0 | 1.067105 | 0.891 | 0.702 | 0 | T cells | CD7           | 0.189 |
| 0 | 1.04126  | 0.816 | 0.763 | 0 | T cells | BATF          | 0.053 |
| 0 | 0.996307 | 0.779 | 0.583 | 0 | T cells | GZMA          | 0.196 |
| 0 | 0.951372 | 0.93  | 0.804 | 0 | T cells | RGCC          | 0.126 |
| 0 | 0.914015 | 0.844 | 0.711 | 0 | T cells | SPOCK2        | 0.133 |
| 0 | 0.908658 | 0.982 | 0.829 | 0 | T cells | SRGN          | 0.153 |
| 0 | 0.85693  | 0.876 | 0.752 | 0 | T cells | RGS1          | 0.124 |
| 0 | 0.817469 | 0.847 | 0.735 | 0 | T cells | TRBC2         | 0.112 |
| 0 | 0.790858 | 0.816 | 0.692 | 0 | T cells | RORA          | 0.124 |
| 0 | 0.777678 | 0.99  | 0.937 | 0 | T cells | DNAJB1        | 0.053 |
| 0 | 0.773213 | 0.838 | 0.65  | 0 | T cells | ANXA1         | 0.188 |
| 0 | 0.771848 | 0.912 | 0.766 | 0 | T cells | CREM          | 0.146 |
| 0 | 0.770515 | 0.843 | 0.657 | 0 | T cells | LAT           | 0.186 |
| 0 | 0.759128 | 0.832 | 0.663 | 0 | T cells | GIMAP7        | 0.169 |
| 0 | 0.699581 | 0.841 | 0.726 | 0 | T cells | CD247         | 0.115 |
| 0 | 0.68482  | 0.978 | 0.897 | 0 | T cells | NFKBIA        | 0.081 |
| 0 | 0.684003 | 0.85  | 0.632 | 0 | T cells | AQP3          | 0.218 |
| 0 | 0.683002 | 0.933 | 0.801 | 0 | T cells | CITED2        | 0.132 |
| 0 | 0.673505 | 0.947 | 0.859 | 0 | T cells | CORO1A        | 0.088 |
| 0 | 0.667473 | 0.756 | 0.565 | 0 | T cells | ITM2A         | 0.191 |
| 0 | 0.661322 | 0.811 | 0.715 | 0 | T cells | SYTL3         | 0.096 |
| 0 | 0.642573 | 0.926 | 0.826 | 0 | T cells | TAGAP         | 0.1   |
| 0 | 0.633949 | 0.728 | 0.664 | 0 | T cells | CST7          | 0.064 |
| 0 | 0.613463 | 0.746 | 0.667 | 0 | T cells | DUSP4         | 0.079 |
| 0 | 0.605766 | 0.771 | 0.693 | 0 | T cells | SH2D2A        | 0.078 |
| 0 | 0.60437  | 0.948 | 0.799 | 0 | T cells | DUSP2         | 0.149 |
| 0 | 0.600451 | 0.729 | 0.564 | 0 | T cells | TNFRSF4       | 0.165 |
| 0 | 0.594523 | 0.735 | 0.637 | 0 | T cells | ITK           | 0.098 |
| 0 | 0.593671 | 0.84  | 0.712 | 0 | T cells | CD27          | 0.128 |
| 0 | 0.591493 | 0.984 | 0.911 | 0 | T cells | KLF6          | 0.073 |
| 0 | 0.580975 | 0.803 | 0.669 | 0 | T cells | SCML4         | 0.134 |
| 0 | 0.568496 | 0.814 | 0.582 | 0 | T cells | SAMSN1        | 0.232 |
| 0 | 0.56475  | 0.775 | 0.655 | 0 | T cells | TRAT1         | 0.12  |
| 0 | 0.555345 | 0.768 | 0.697 | 0 | T cells | GIMAP4        | 0.071 |
| 0 | 0.549118 | 0.987 | 0.935 | 0 | T cells | ZFP36         | 0.052 |
| 0 | 0.540688 | 0.908 | 0.766 | 0 | T cells | SOCS1         | 0.142 |
| 0 | 0.535264 | 0.978 | 0.895 | 0 | T cells | CD69          | 0.083 |
| 0 | 0.531173 | 0.897 | 0.773 | 0 | T cells | TUBA4A        | 0.124 |
| 0 | 0.529931 | 0.977 | 0.916 | 0 | T cells | PFN1          | 0.061 |
| 0 | 0.529697 | 0.832 | 0.672 | 0 | T cells | PTGER4        | 0.16  |
| 0 | 0.527766 | 0.749 | 0.655 | 0 | T cells | SLA           | 0.094 |
| 0 | 0.527515 | 0.71  | 0.543 | 0 | T cells | TRAC          | 0.167 |
| 0 | 0.526894 | 0.897 | 0.789 | 0 | T cells | CACYBP        | 0.108 |
| 0 | 0.521068 | 0.756 | 0.592 | 0 | T cells | SLAMF1        | 0.164 |
| 0 | 0.520858 | 0.63  | 0.511 | 0 | T cells | CTLA4         | 0.119 |
| 0 | 0.515418 | 0.783 | 0.73  | 0 | T cells | PRDM1         | 0.053 |
| 0 | 0.509915 | 0.742 | 0.607 | 0 | T cells | TNFRSF180.135 |       |
| 0 | 0.503974 | 0.936 | 0.776 | 0 | T cells | HSPA1A        | 0.16  |
| 0 | 0.497235 | 0.75  | 0.595 | 0 | T cells | FLT3LG        | 0.155 |
| 0 | 0.494905 | 0.786 | 0.621 | 0 | T cells | GNG2          | 0.165 |
| 0 | 0.493089 | 0.813 | 0.693 | 0 | T cells | PTPN7         | 0.12  |
| 0 | 0.492529 | 0.839 | 0.712 | 0 | T cells | FKBP5         | 0.127 |
| 0 | 0.479907 | 0.917 | 0.783 | 0 | T cells | LDHA          | 0.134 |
| 0 | 0.477217 | 0.935 | 0.851 | 0 | T cells | CD52          | 0.084 |
| 0 | 0.469643 | 0.793 | 0.707 | 0 | T cells | TNFRSF1E0.086 |       |
| 0 | 0.462558 | 0.764 | 0.67  | 0 | T cells | NR3C1         | 0.094 |

|   |          |       |       |   |         |           |       |
|---|----------|-------|-------|---|---------|-----------|-------|
| 0 | 0.456863 | 0.998 | 0.968 | 0 | T cells | ACTB      | 0.03  |
| 0 | 0.456798 | 0.832 | 0.696 | 0 | T cells | CLEC2B    | 0.136 |
| 0 | 0.442617 | 0.891 | 0.756 | 0 | T cells | COTL1     | 0.135 |
| 0 | 0.440009 | 0.792 | 0.641 | 0 | T cells | GLIPR1    | 0.151 |
| 0 | 0.438479 | 0.945 | 0.838 | 0 | T cells | IFITM1    | 0.107 |
| 0 | 0.434616 | 0.754 | 0.61  | 0 | T cells | ARL4C     | 0.144 |
| 0 | 0.424729 | 0.995 | 0.979 | 0 | T cells | TMSB4X    | 0.016 |
| 0 | 0.423541 | 0.994 | 0.964 | 0 | T cells | JUNB      | 0.03  |
| 0 | 0.422994 | 0.959 | 0.792 | 0 | T cells | VIM       | 0.167 |
| 0 | 0.416427 | 0.795 | 0.713 | 0 | T cells | TMIGD2    | 0.082 |
| 0 | 0.413754 | 0.796 | 0.631 | 0 | T cells | LEF1      | 0.165 |
| 0 | 0.411255 | 0.885 | 0.739 | 0 | T cells | PIM2      | 0.146 |
| 0 | 0.410618 | 0.833 | 0.761 | 0 | T cells | LCP1      | 0.072 |
| 0 | 0.408919 | 0.794 | 0.674 | 0 | T cells | PASK      | 0.12  |
| 0 | 0.408145 | 0.988 | 0.936 | 0 | T cells | ACTG1     | 0.052 |
| 0 | 0.404651 | 0.853 | 0.677 | 0 | T cells | LSP1      | 0.176 |
| 0 | 0.40267  | 0.904 | 0.804 | 0 | T cells | ZNF331    | 0.1   |
| 0 | 0.400605 | 0.67  | 0.558 | 0 | T cells | LINC01871 | 0.112 |
| 0 | 0.399986 | 0.803 | 0.624 | 0 | T cells | IL6ST     | 0.179 |
| 0 | 0.397774 | 0.731 | 0.518 | 0 | T cells | FAS       | 0.213 |
| 0 | 0.397038 | 0.732 | 0.521 | 0 | T cells | GBP5      | 0.211 |
| 0 | 0.384783 | 0.803 | 0.687 | 0 | T cells | TCF7      | 0.116 |
| 0 | 0.38268  | 0.723 | 0.618 | 0 | T cells | DOK2      | 0.105 |
| 0 | 0.381525 | 0.739 | 0.561 | 0 | T cells | CCL20     | 0.178 |
| 0 | 0.380374 | 0.83  | 0.643 | 0 | T cells | ARID5B    | 0.187 |
| 0 | 0.378728 | 0.999 | 0.989 | 0 | T cells | EEF1A1    | 0.01  |
| 0 | 0.378147 | 0.999 | 0.995 | 0 | T cells | RPLP1     | 0.004 |
| 0 | 0.376446 | 0.913 | 0.834 | 0 | T cells | SLC2A3    | 0.079 |
| 0 | 0.375108 | 0.835 | 0.729 | 0 | T cells | GPR183    | 0.106 |
| 0 | 0.373128 | 0.71  | 0.523 | 0 | T cells | LAG3      | 0.187 |
| 0 | 0.370667 | 0.838 | 0.698 | 0 | T cells | ITGAE     | 0.14  |
| 0 | 0.370556 | 0.795 | 0.666 | 0 | T cells | CORO1B    | 0.129 |
| 0 | 0.369132 | 0.724 | 0.558 | 0 | T cells | CARD16    | 0.166 |
| 0 | 0.36865  | 0.739 | 0.613 | 0 | T cells | ITGA4     | 0.126 |
| 0 | 0.366745 | 0.734 | 0.652 | 0 | T cells | SIT1      | 0.082 |
| 0 | 0.352309 | 0.882 | 0.714 | 0 | T cells | PDE4B     | 0.168 |
| 0 | 0.350744 | 0.716 | 0.653 | 0 | T cells | GPRIN3    | 0.063 |
| 0 | 0.350488 | 0.867 | 0.693 | 0 | T cells | UCP2      | 0.174 |
| 0 | 0.344644 | 0.766 | 0.627 | 0 | T cells | PIM1      | 0.139 |
| 0 | 0.337341 | 0.801 | 0.609 | 0 | T cells | FAM107B   | 0.192 |
| 0 | 0.335705 | 0.738 | 0.574 | 0 | T cells | CD4       | 0.164 |
| 0 | 0.334863 | 0.767 | 0.568 | 0 | T cells | JAML      | 0.199 |
| 0 | 0.32724  | 0.736 | 0.635 | 0 | T cells | PDE3B     | 0.101 |
| 0 | 0.326753 | 0.729 | 0.589 | 0 | T cells | FBLN7     | 0.14  |
| 0 | 0.320313 | 0.712 | 0.588 | 0 | T cells | IL2RB     | 0.124 |
| 0 | 0.311624 | 0.832 | 0.693 | 0 | T cells | FKBP1A    | 0.139 |
| 0 | 0.311178 | 0.812 | 0.682 | 0 | T cells | PGAM1     | 0.13  |
| 0 | 0.308524 | 0.819 | 0.67  | 0 | T cells | NKG7      | 0.149 |
| 0 | 0.306775 | 0.77  | 0.638 | 0 | T cells | SUSD3     | 0.132 |
| 0 | 0.306315 | 0.719 | 0.63  | 0 | T cells | TESPA1    | 0.089 |
| 0 | 0.30624  | 0.813 | 0.639 | 0 | T cells | VSIR      | 0.174 |
| 0 | 0.304082 | 0.741 | 0.596 | 0 | T cells | SAMHD1    | 0.145 |
| 0 | 0.302938 | 0.732 | 0.621 | 0 | T cells | FAM129A   | 0.111 |
| 0 | 0.300813 | 0.662 | 0.484 | 0 | T cells | GBP2      | 0.178 |
| 0 | 0.296323 | 0.772 | 0.68  | 0 | T cells | GPR65     | 0.092 |
| 0 | 0.285603 | 0.698 | 0.602 | 0 | T cells | JAK3      | 0.096 |

|           |          |       |       |           |         |           |       |
|-----------|----------|-------|-------|-----------|---------|-----------|-------|
| 0         | 0.269898 | 0.709 | 0.551 | 0         | T cells | TNIK      | 0.158 |
| 0         | 0.267442 | 0.762 | 0.611 | 0         | T cells | LYAR      | 0.151 |
| 0         | 0.266899 | 0.689 | 0.534 | 0         | T cells | TSPAN5    | 0.155 |
| 0         | 0.266362 | 0.813 | 0.682 | 0         | T cells | RAB9A     | 0.131 |
| 0         | 0.264118 | 0.919 | 0.783 | 0         | T cells | ZFAND5    | 0.136 |
| 1.07E-303 | 0.267656 | 0.926 | 0.779 | 2.14E-300 | T cells | TUBA1A    | 0.147 |
| 4.23E-299 | 0.475993 | 0.798 | 0.734 | 8.45E-296 | T cells | PHLDA1    | 0.064 |
| 5.26E-299 | 0.344054 | 0.783 | 0.663 | 1.05E-295 | T cells | CTSC      | 0.12  |
| 3.63E-298 | 0.348669 | 0.748 | 0.718 | 7.26E-295 | T cells | RUNX3     | 0.03  |
| 1.09E-294 | 0.40569  | 0.828 | 0.799 | 2.19E-291 | T cells | LTB       | 0.029 |
| 2.04E-290 | 0.321194 | 0.992 | 0.966 | 4.08E-287 | T cells | HSP90AA10 | 0.026 |
| 7.05E-290 | 0.354389 | 0.801 | 0.704 | 1.41E-286 | T cells | HMGB2     | 0.097 |
| 9.65E-286 | 0.314135 | 0.736 | 0.663 | 1.93E-282 | T cells | TNF       | 0.073 |
| 3.66E-284 | 0.311278 | 0.782 | 0.687 | 7.33E-281 | T cells | BTG3      | 0.095 |
| 1.82E-279 | 0.432732 | 0.708 | 0.644 | 3.64E-276 | T cells | CKLF      | 0.064 |
| 1.29E-278 | 0.354306 | 0.93  | 0.84  | 2.57E-275 | T cells | H2AFZ     | 0.09  |
| 3.41E-278 | 0.269981 | 0.989 | 0.916 | 6.83E-275 | T cells | DUSP1     | 0.073 |
| 1.55E-274 | 0.303747 | 0.785 | 0.678 | 3.09E-271 | T cells | LDLRAD4   | 0.107 |
| 3.50E-274 | 0.297557 | 0.913 | 0.847 | 6.99E-271 | T cells | RAN       | 0.066 |
| 3.58E-273 | 0.380272 | 0.656 | 0.545 | 7.15E-270 | T cells | CD8B      | 0.111 |
| 9.11E-273 | 0.311074 | 0.75  | 0.63  | 1.82E-269 | T cells | LIMS1     | 0.12  |
| 6.48E-272 | 0.337568 | 0.75  | 0.641 | 1.30E-268 | T cells | RBPJ      | 0.109 |
| 1.87E-269 | 0.307301 | 0.674 | 0.584 | 3.73E-266 | T cells | GALM      | 0.09  |
| 7.69E-267 | 0.44178  | 0.721 | 0.666 | 1.54E-263 | T cells | CCR6      | 0.055 |
| 1.76E-264 | 0.415951 | 0.733 | 0.688 | 3.52E-261 | T cells | CYTOR     | 0.045 |
| 3.94E-258 | 0.338337 | 0.662 | 0.555 | 7.87E-255 | T cells | PTPN22    | 0.107 |
| 1.46E-249 | 0.267293 | 0.772 | 0.723 | 2.92E-246 | T cells | PDE4D     | 0.049 |
| 3.38E-246 | 0.34051  | 0.636 | 0.563 | 6.77E-243 | T cells | GPR171    | 0.073 |
| 9.91E-242 | 0.390197 | 0.738 | 0.704 | 1.98E-238 | T cells | ALOX5AP   | 0.034 |
| 1.62E-239 | 0.376484 | 0.782 | 0.635 | 3.23E-236 | T cells | CCL4      | 0.147 |
| 4.30E-210 | 0.272637 | 0.817 | 0.751 | 8.59E-207 | T cells | H2AFV     | 0.066 |
| 9.37E-188 | 0.276383 | 0.756 | 0.698 | 1.87E-184 | T cells | ERN1      | 0.058 |

Table S6. A list of 29 CSC marker genes associated with DSS

|            | p.value   | HR        | Low 95%CI | High 95%CI |
|------------|-----------|-----------|-----------|------------|
| PHLDA2     | 0.0442528 | 1.3100187 | 1.0069674 | 1.7042745  |
| FKBP4      | 0.0084394 | 1.5981636 | 1.1274683 | 2.2653649  |
| LMNA       | 0.0025966 | 1.9363306 | 1.2595856 | 2.9766744  |
| BRI3       | 0.0360618 | 1.5789595 | 1.0301373 | 2.4201756  |
| IER5L      | 0.0015373 | 1.6100161 | 1.1990875 | 2.1617703  |
| EPS8L2     | 0.0201196 | 1.6566603 | 1.0823056 | 2.5358118  |
| CPNE7      | 0.0409451 | 1.2064298 | 1.007753  | 1.4442754  |
| LENG8      | 0.0181466 | 1.4400699 | 1.0641249 | 1.9488325  |
| DDX11      | 0.0111707 | 1.7101988 | 1.1298694 | 2.5886001  |
| HAGHL      | 0.0049022 | 1.3904706 | 1.1051657 | 1.7494286  |
| HOOK2      | 0.0313762 | 1.6544065 | 1.0460095 | 2.6166692  |
| BOP1       | 0.0299342 | 1.4216611 | 1.0347855 | 1.9531782  |
| AC087239.1 | 0.000221  | 2.2479922 | 1.4626036 | 3.4551184  |
| CEBPB      | 0.0361249 | 1.4619397 | 1.0248704 | 2.0854027  |
| COMTD1     | 0.0363979 | 1.3209917 | 1.0177829 | 1.7145299  |
| STXBP2     | 0.0159027 | 1.8457118 | 1.1215152 | 3.0375443  |
| HSPB1      | 0.0123111 | 1.3835061 | 1.0729779 | 1.7839034  |
| AGPAT2     | 0.028885  | 1.4823833 | 1.0413845 | 2.1101336  |
| PLCG2      | 0.000493  | 1.7455357 | 1.2759943 | 2.3878592  |
| PLEC       | 0.0011933 | 1.6686078 | 1.2242377 | 2.274274   |
| NCOA7      | 0.0208422 | 0.7298907 | 0.5588279 | 0.9533177  |
| USP38      | 0.0499219 | 0.6681203 | 0.4464461 | 0.9998625  |
| HMGCS1     | 0.0364108 | 0.7422845 | 0.5614714 | 0.9813256  |
| CD24       | 0.0007552 | 0.7193951 | 0.5939496 | 0.8713355  |
| GFPT1      | 0.017982  | 0.6716049 | 0.4829437 | 0.9339664  |
| ETS2       | 0.0007904 | 0.5840588 | 0.4266462 | 0.7995493  |
| NUDT4      | 0.0248463 | 0.713533  | 0.531337  | 0.9582043  |
| KIF9       | 0.0377269 | 0.6014288 | 0.3722994 | 0.9715746  |
| GK         | 0.0208628 | 0.7033306 | 0.5218009 | 0.9480129  |
